# Supplementary material for: Efficient Synthesis of Acylated, Dialkyl α-Hydroxy-Benzylphosphonates and Their Anticancer Activity
Source: MDPI journal article supplement (doi:10.3390/molecules27072067), 2022-03-23

## Supplementary Information

### Efficient synthesis of acylated, dialkyl $\alpha$ -hydroxy-benzylphosphonates and their anticancer activity

Petra R. Varga<sup>1</sup>, Alexandra Belovics<sup>1</sup>, Péter Bagi<sup>1</sup>, Szilárd Tóth<sup>2</sup>, Gergely Szakács<sup>3</sup>, Szilvia Bősze<sup>4</sup>, Rita Szabó<sup>4</sup>, László Drahos<sup>5</sup>, György Keglevich<sup>1,\*</sup>

<sup>1</sup>*Department of Organic Chemistry and Technology, Budapest University of Technology and Economics, 1521 Budapest, Hungary*

<sup>2</sup>*Research Centre for Natural Sciences, Institute of Enzymology, 1117 Budapest, Hungary*

<sup>3</sup>*Institute of Cancer Research, Medical University of Vienna, Borschkegasse 8a, A-1090 Vienna, Austria*

<sup>4</sup>*Eötvös Loránd Research Network (ELKH), Research Group of Peptide Chemistry, Eötvös Lorand University, 1117 Budapest, Hungary*

<sup>5</sup>*Research Centre for Natural Sciences, MS Proteomics Research Group, 1117 Budapest, Hungary*

#### **EXPERIMENTAL**

All chemicals were purchased from Sigma-Aldrich.

#### **<sup>31</sup>P, <sup>13</sup>C and <sup>1</sup>H NMR spectra**

$^{31}\text{P}$  NMR spectra for 1c

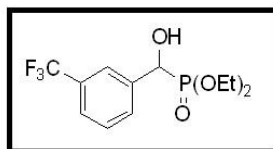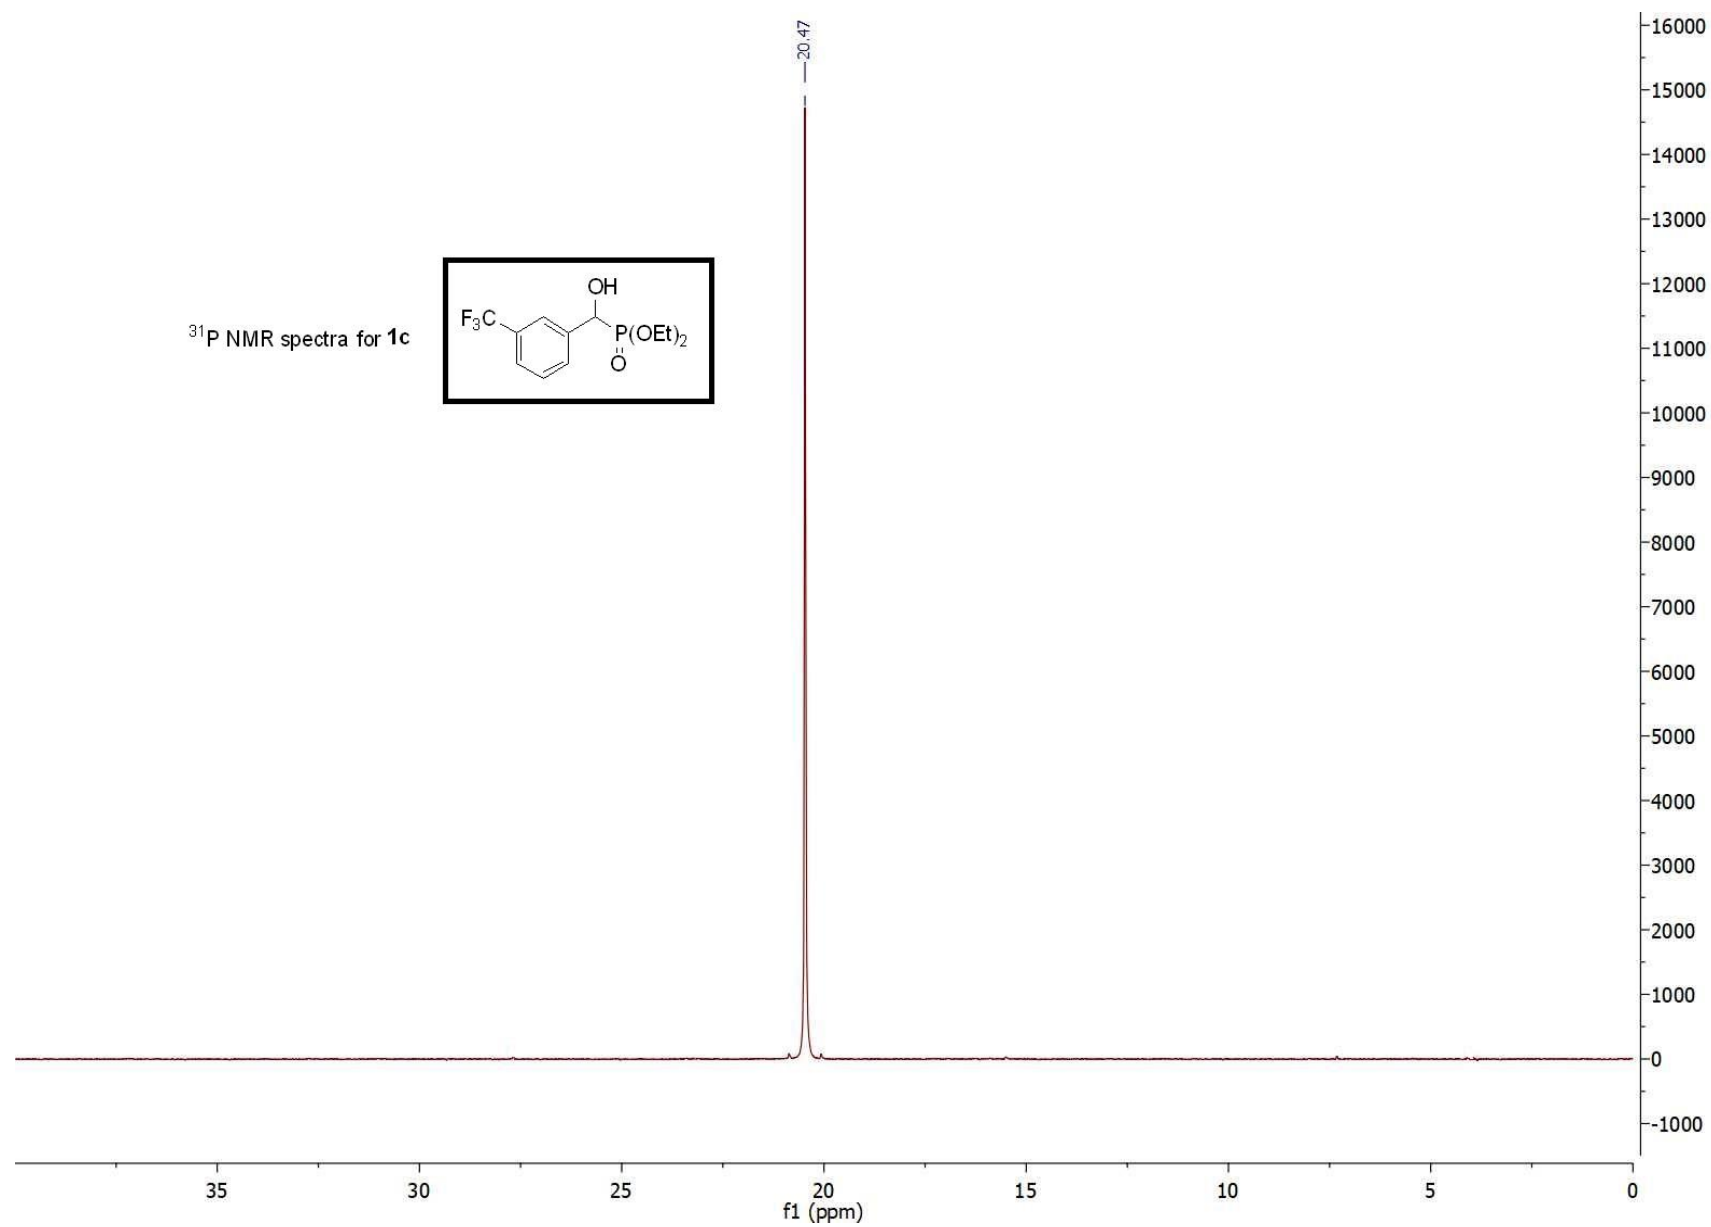

S2

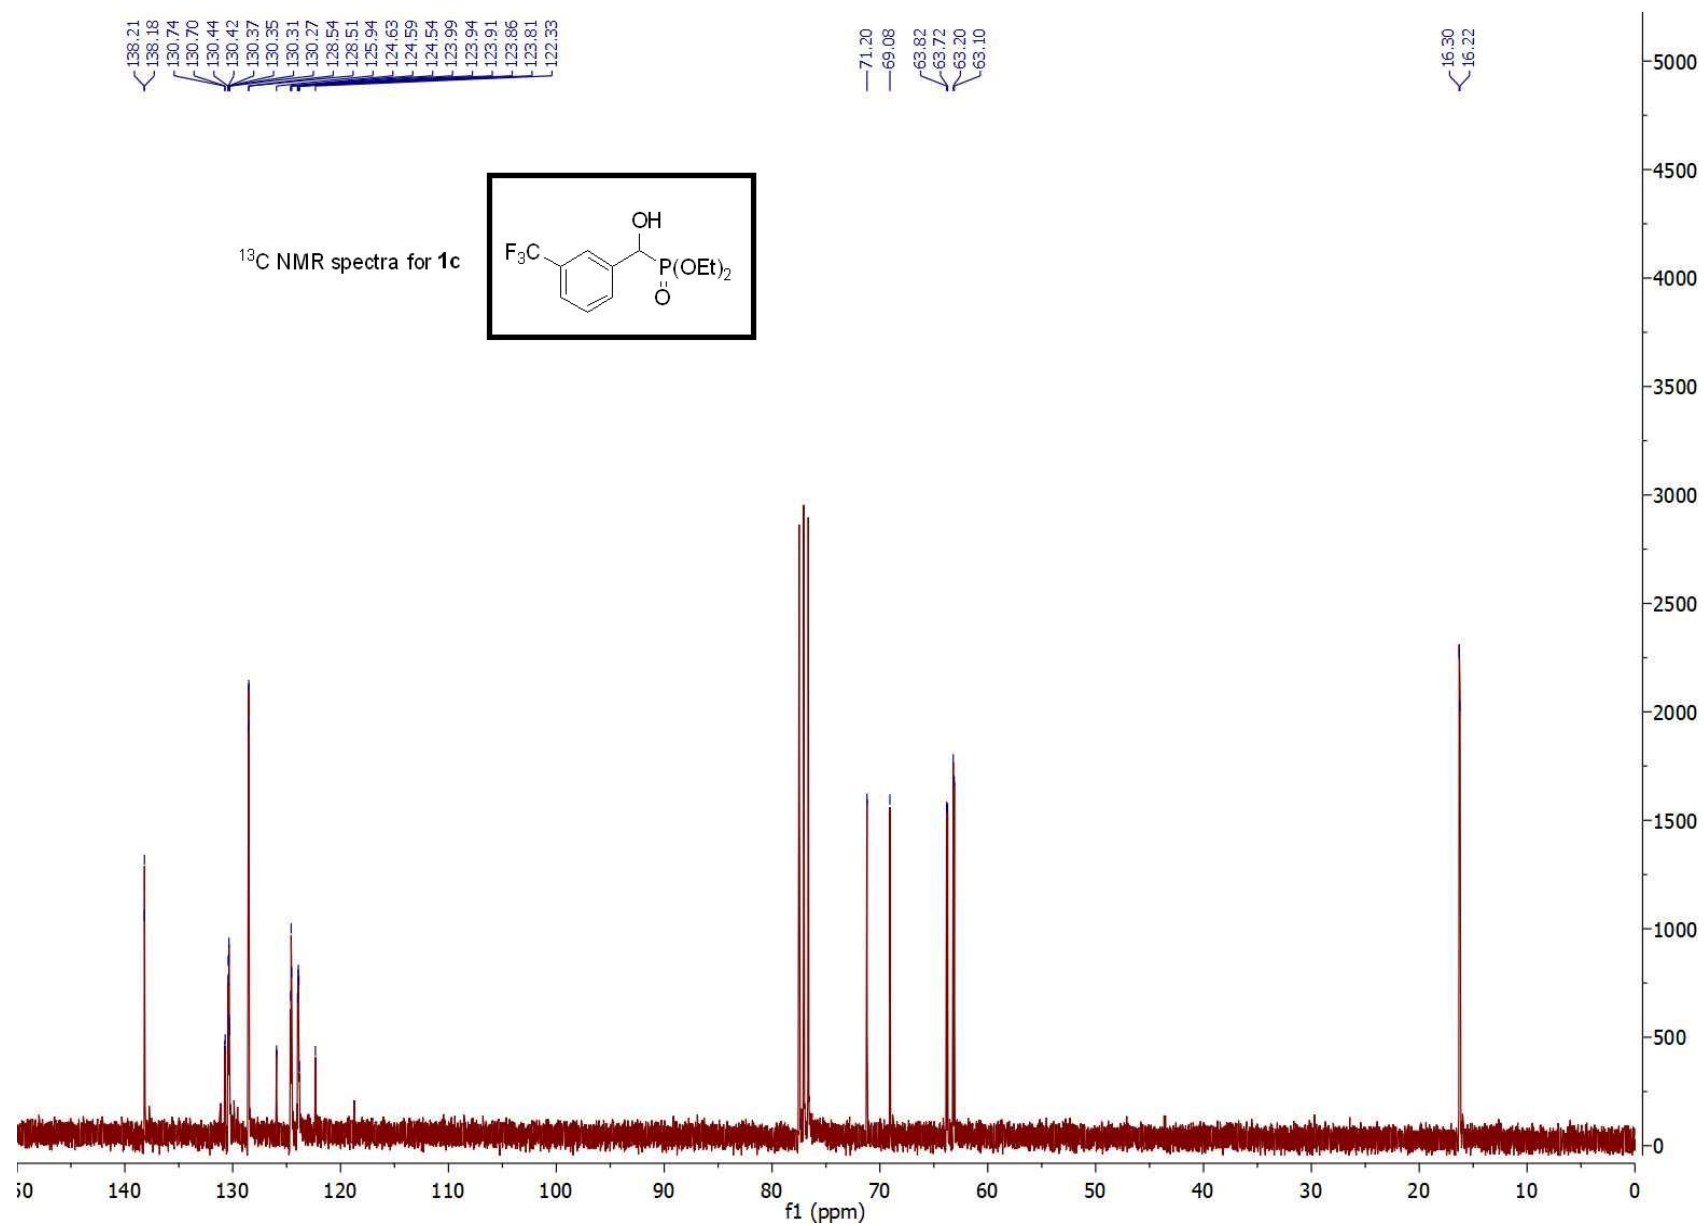

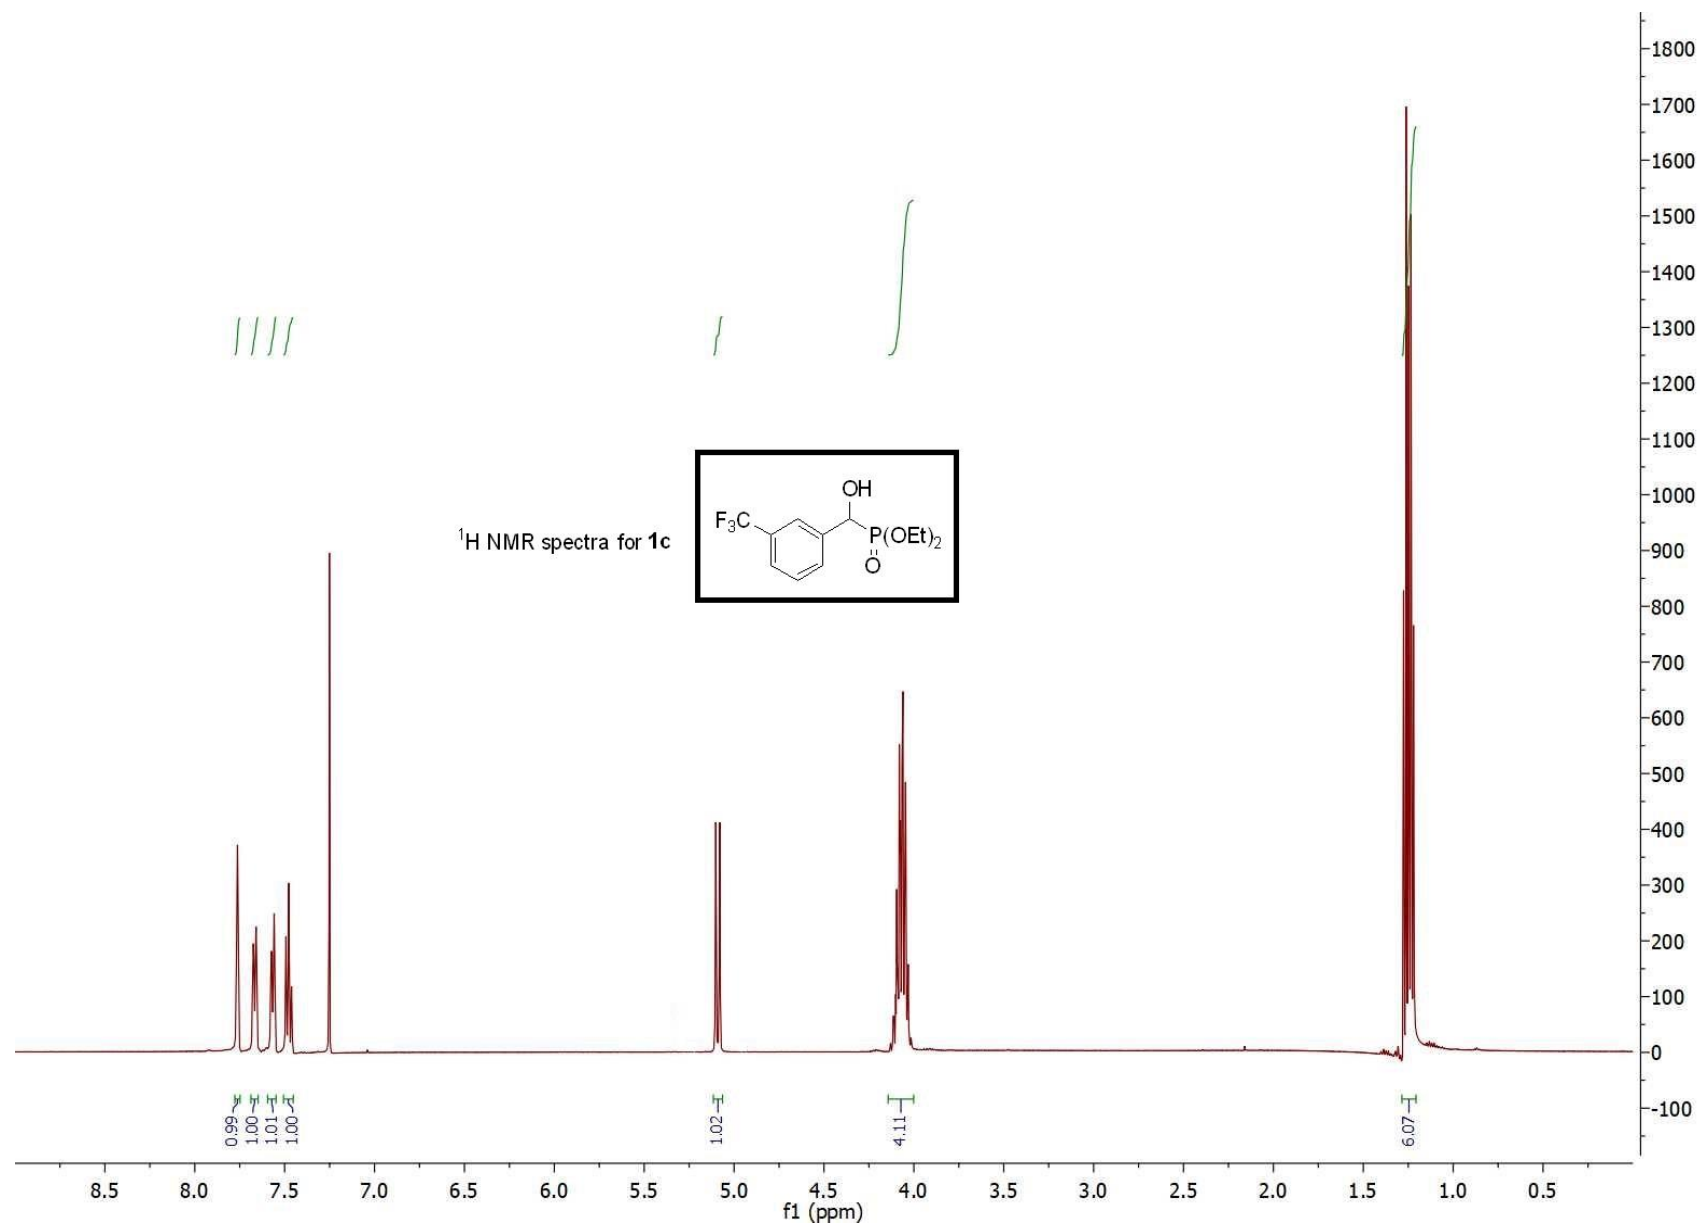

$^{31}\text{P}$  NMR spectra for **1d**

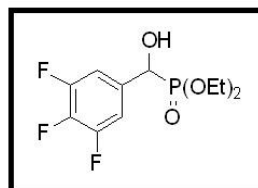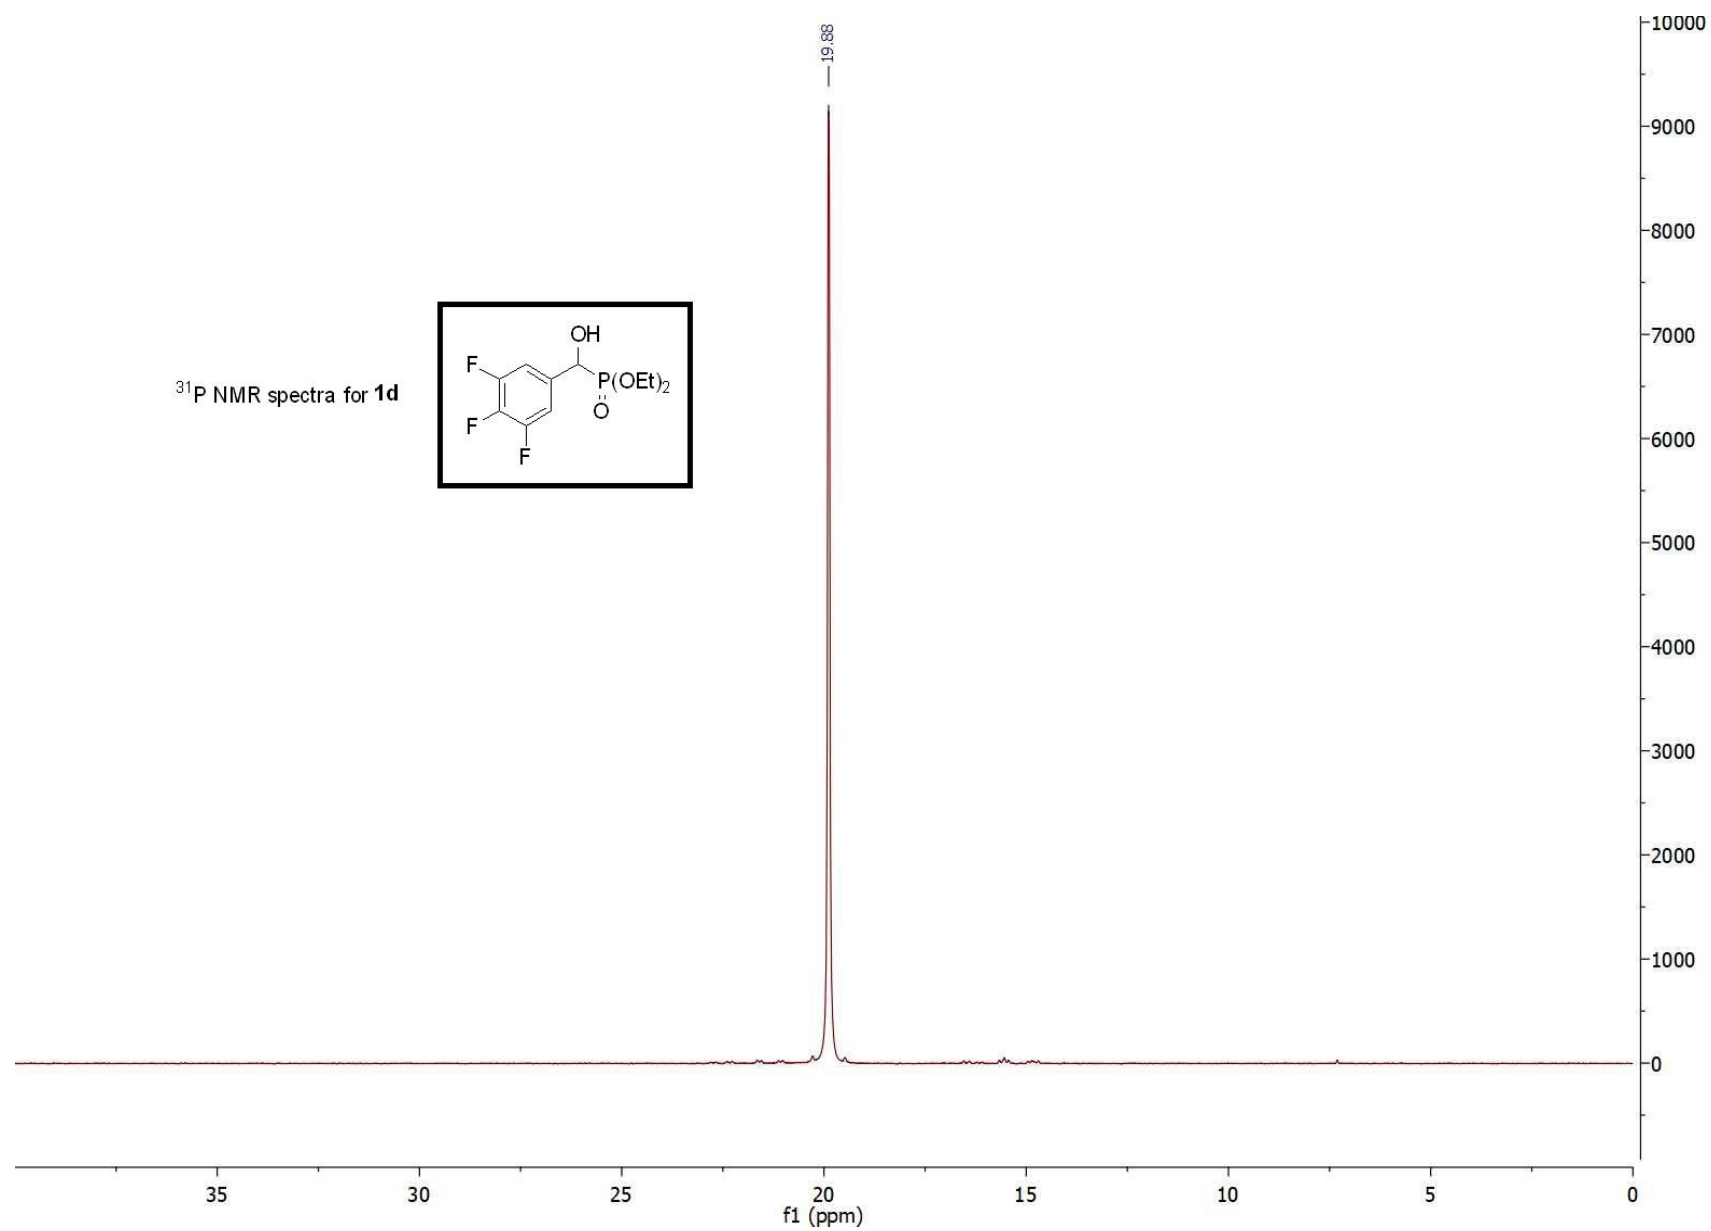

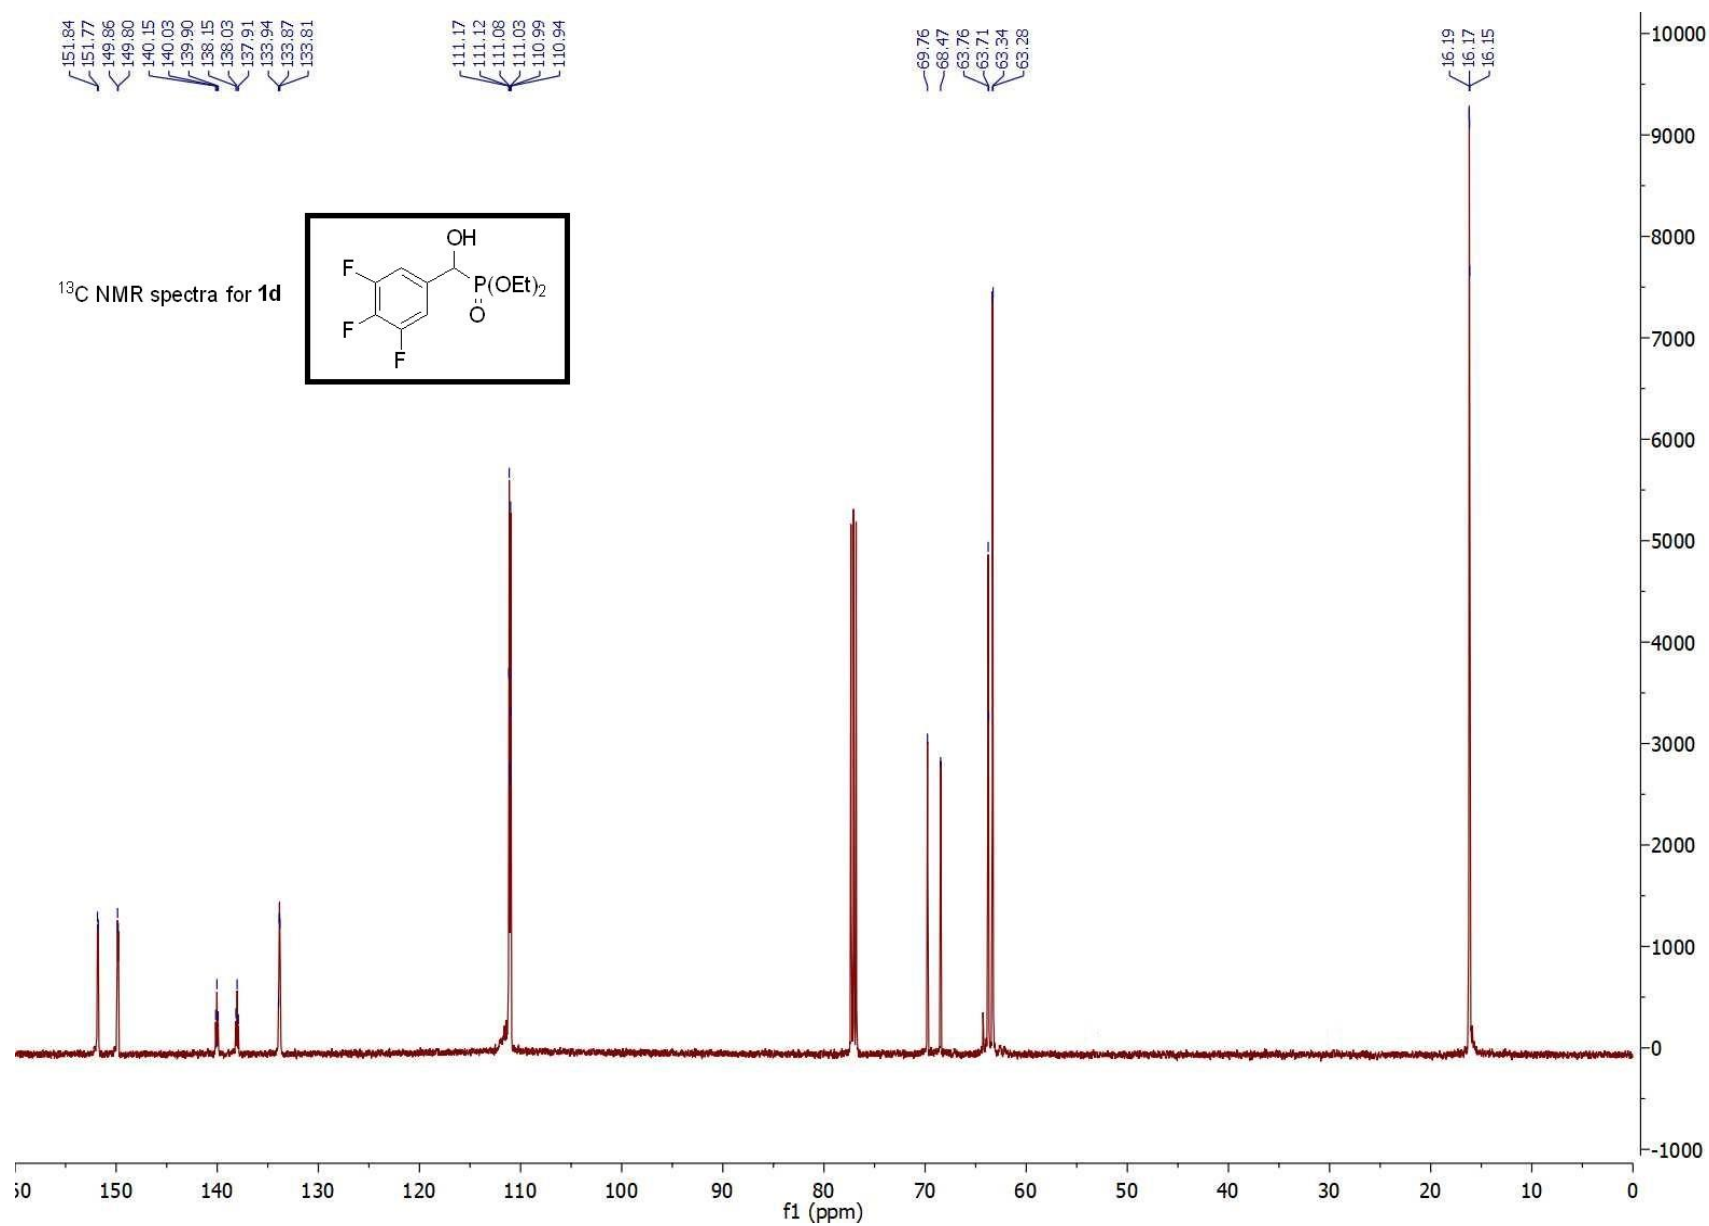

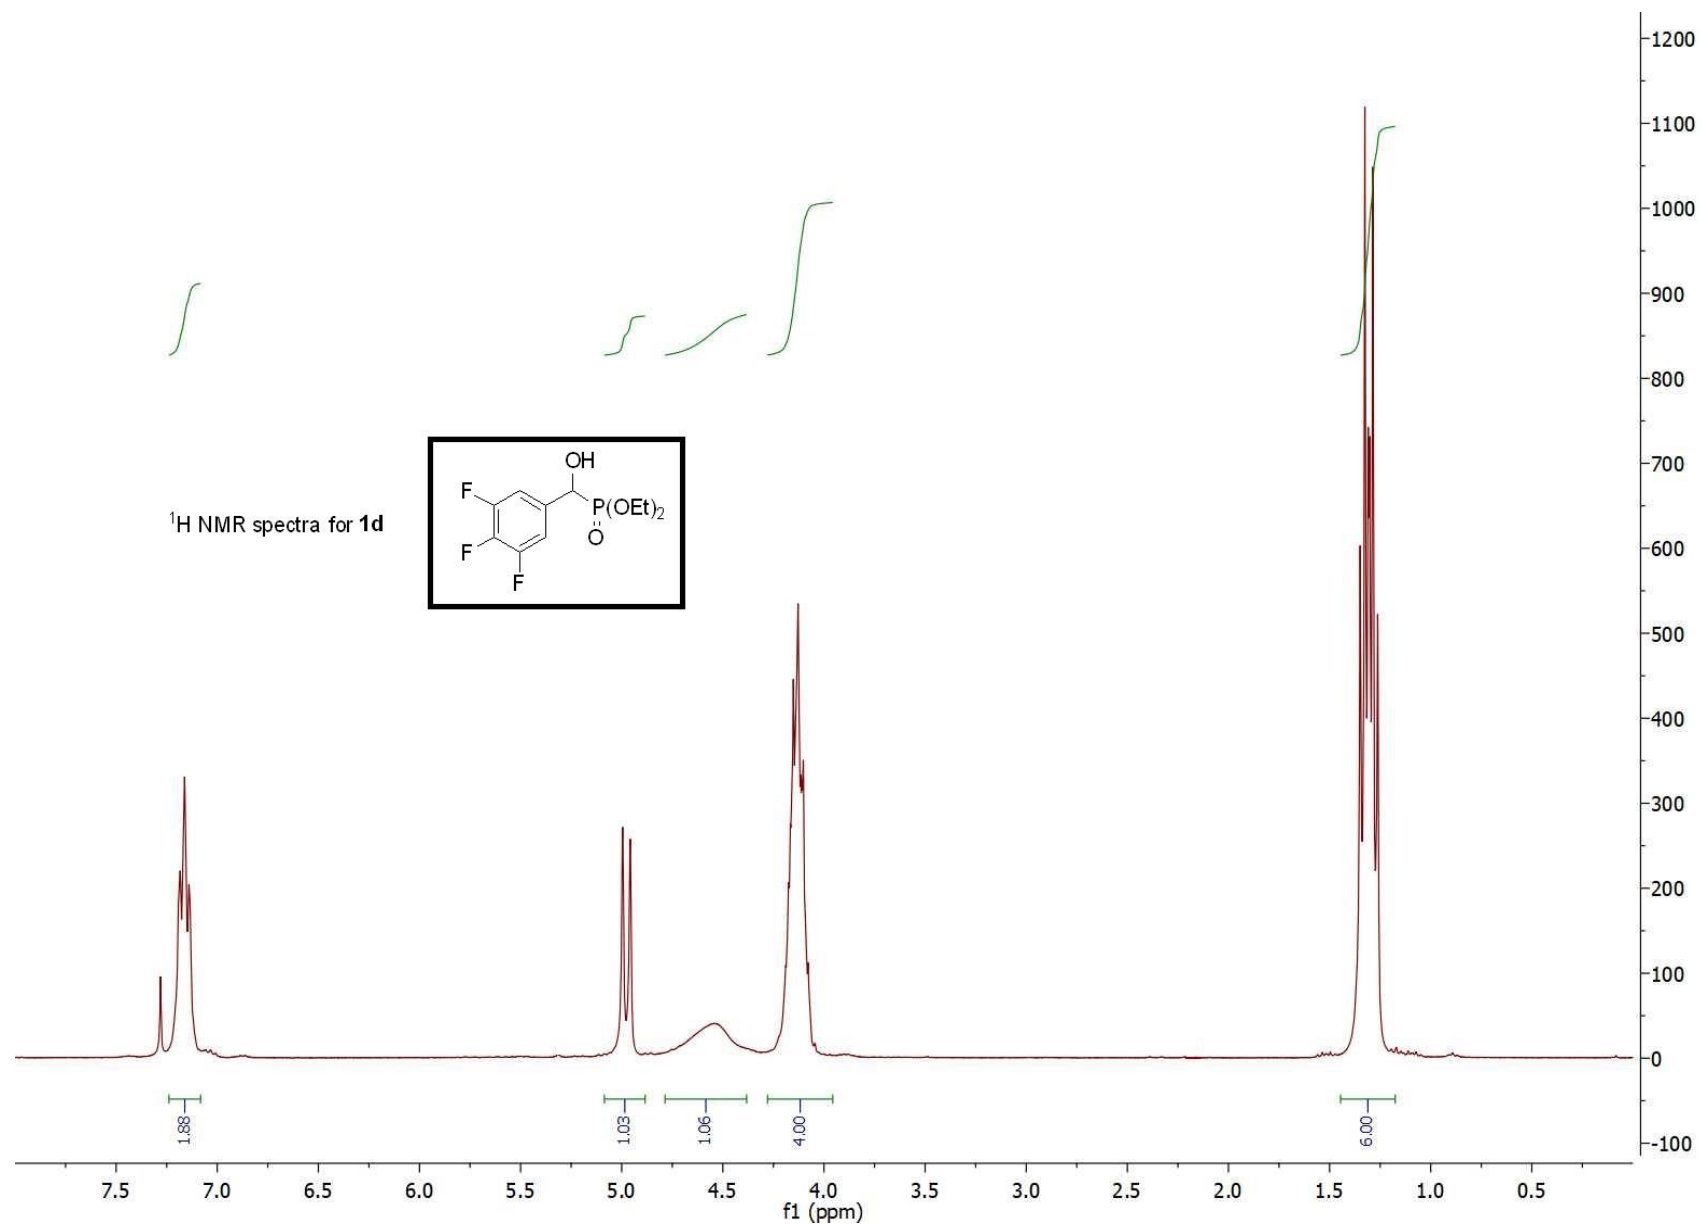

$^{31}\text{P}$  NMR spectra for 2a

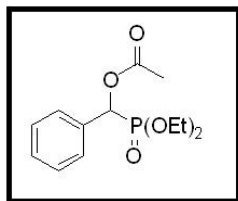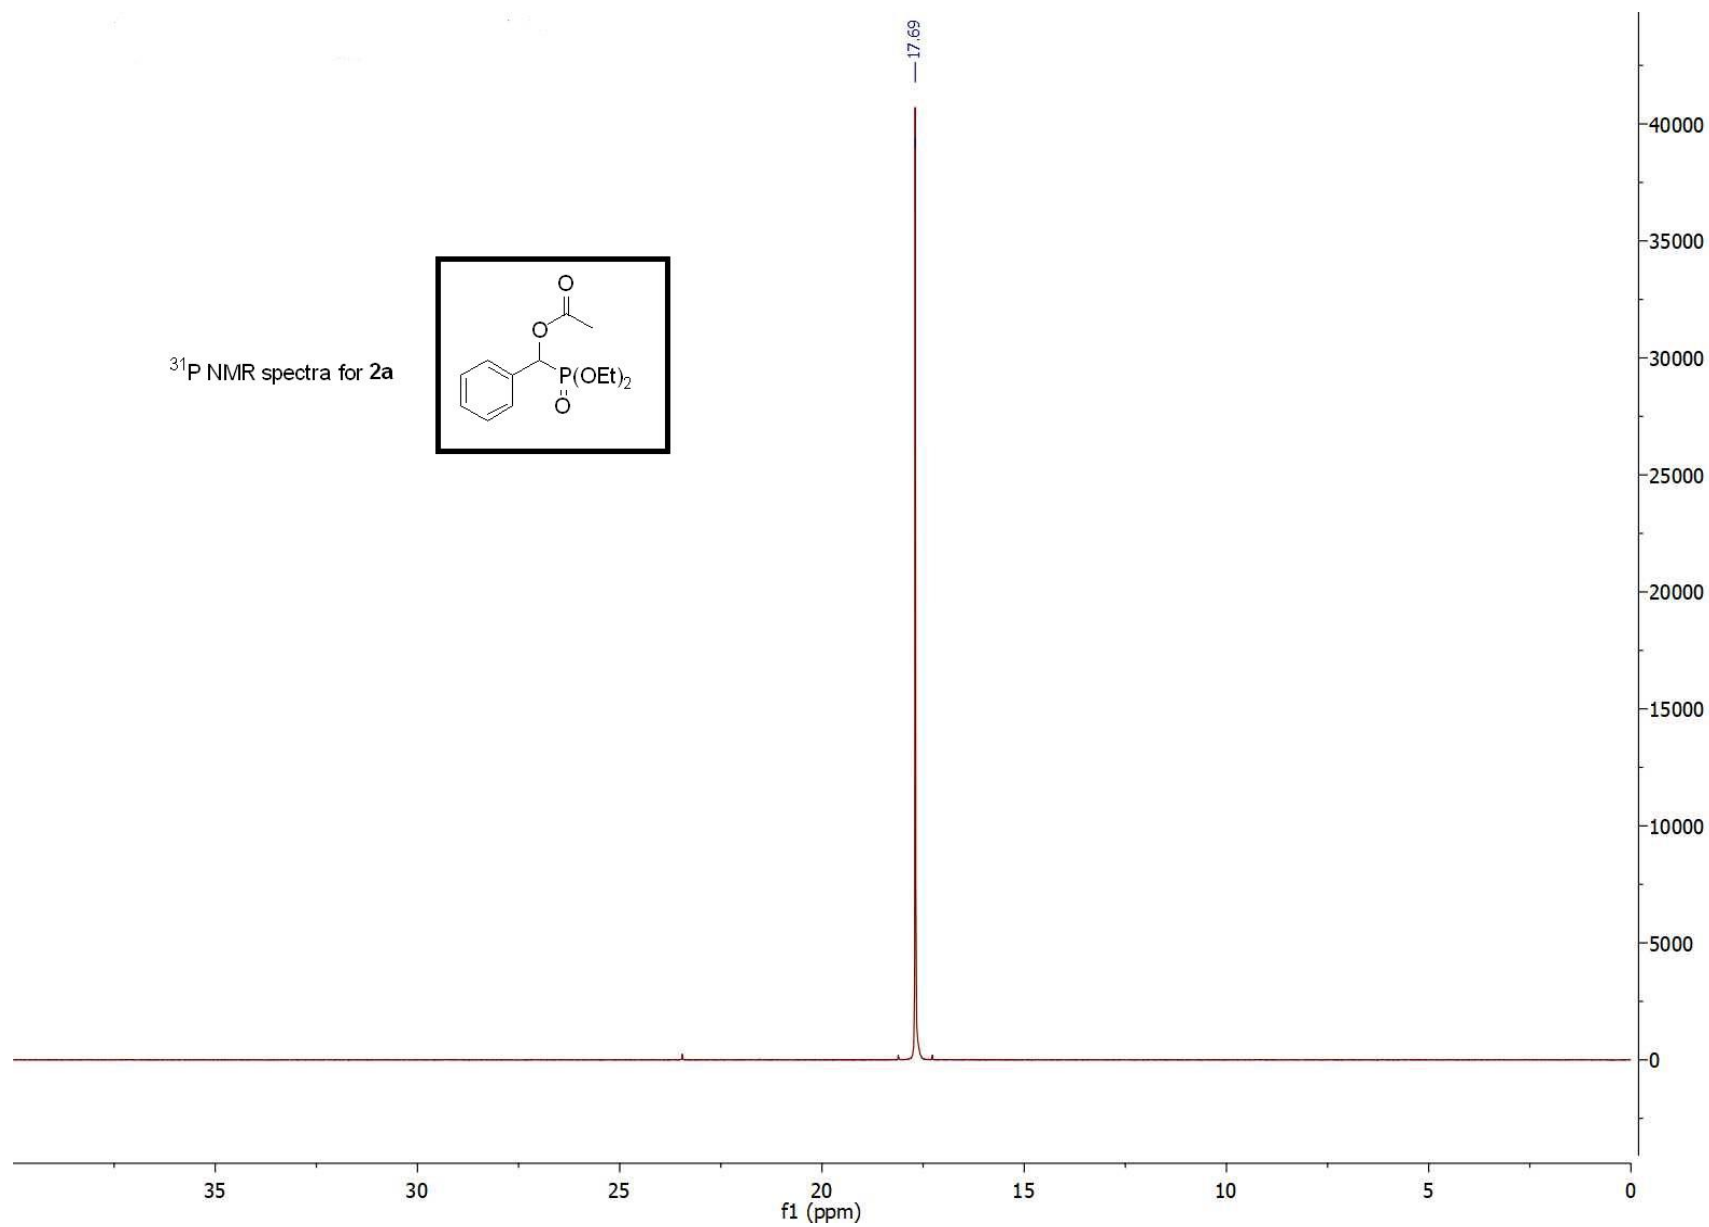

S8



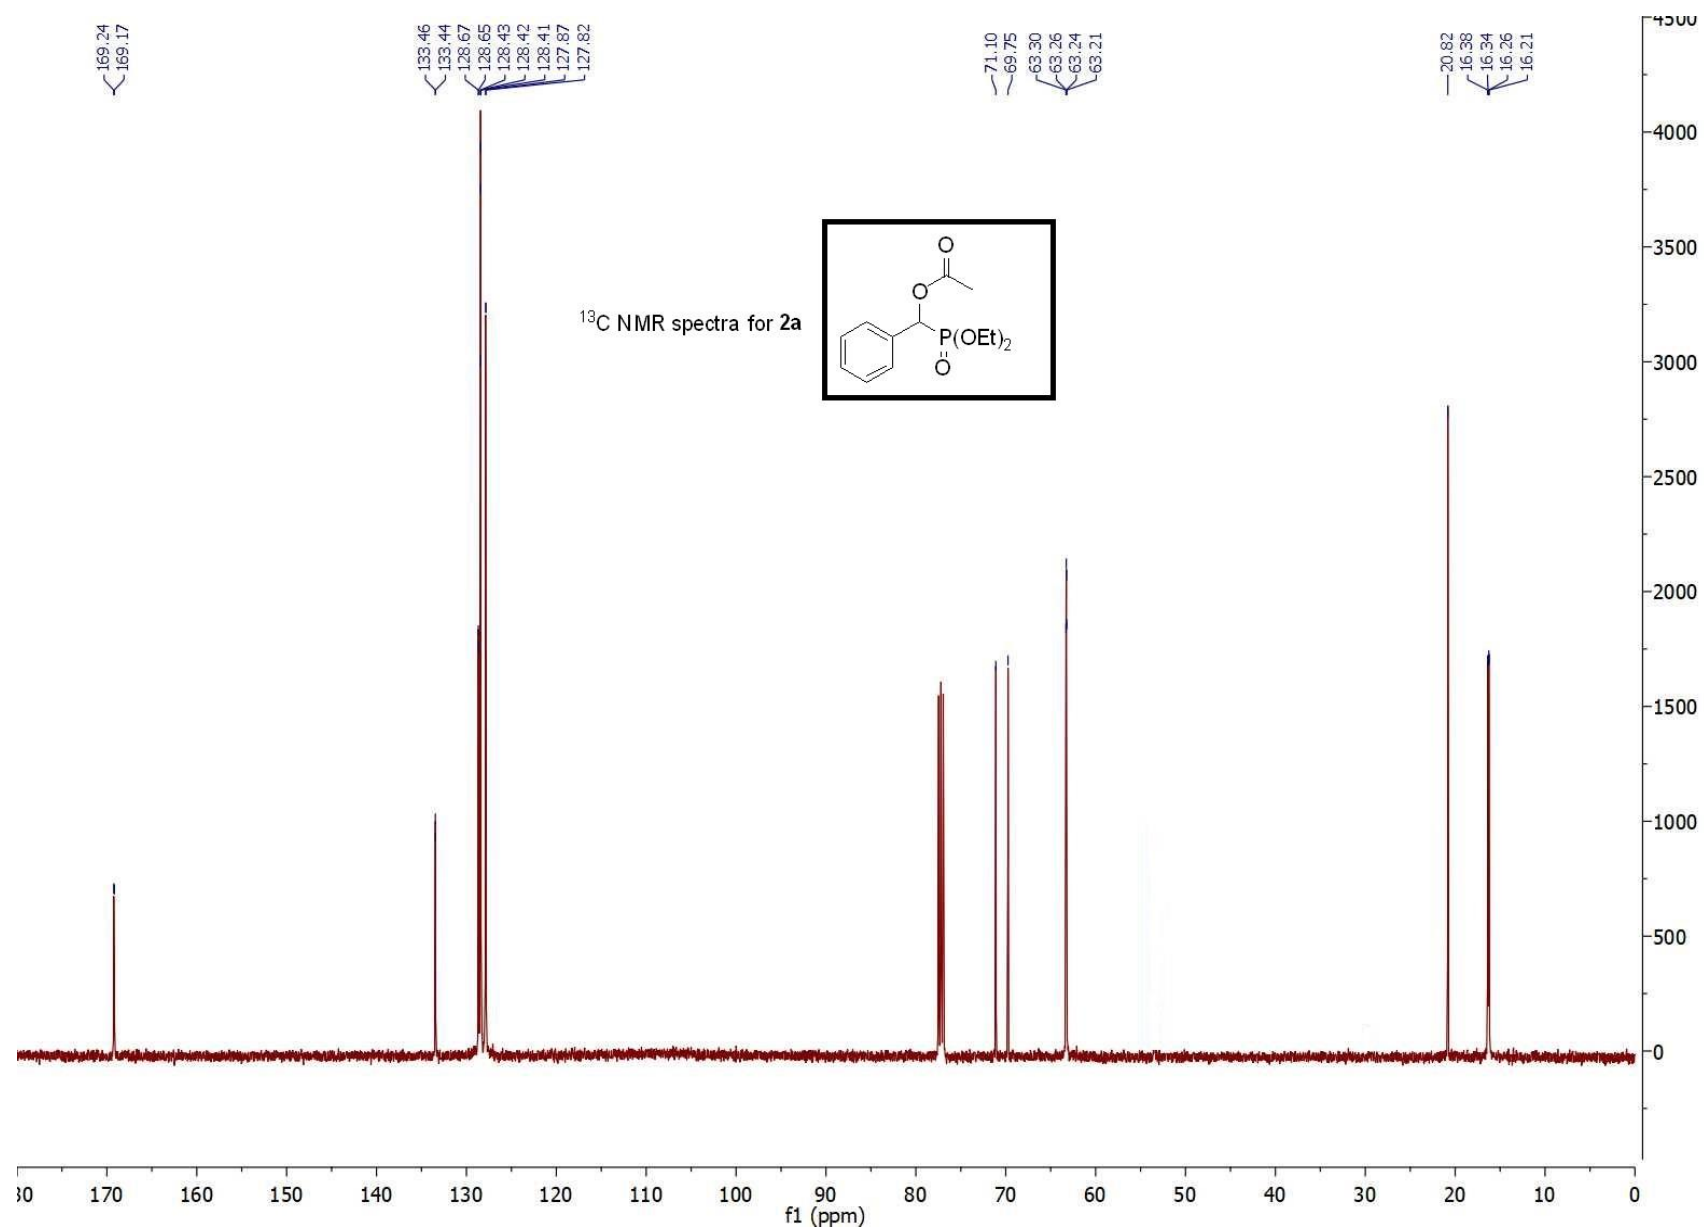

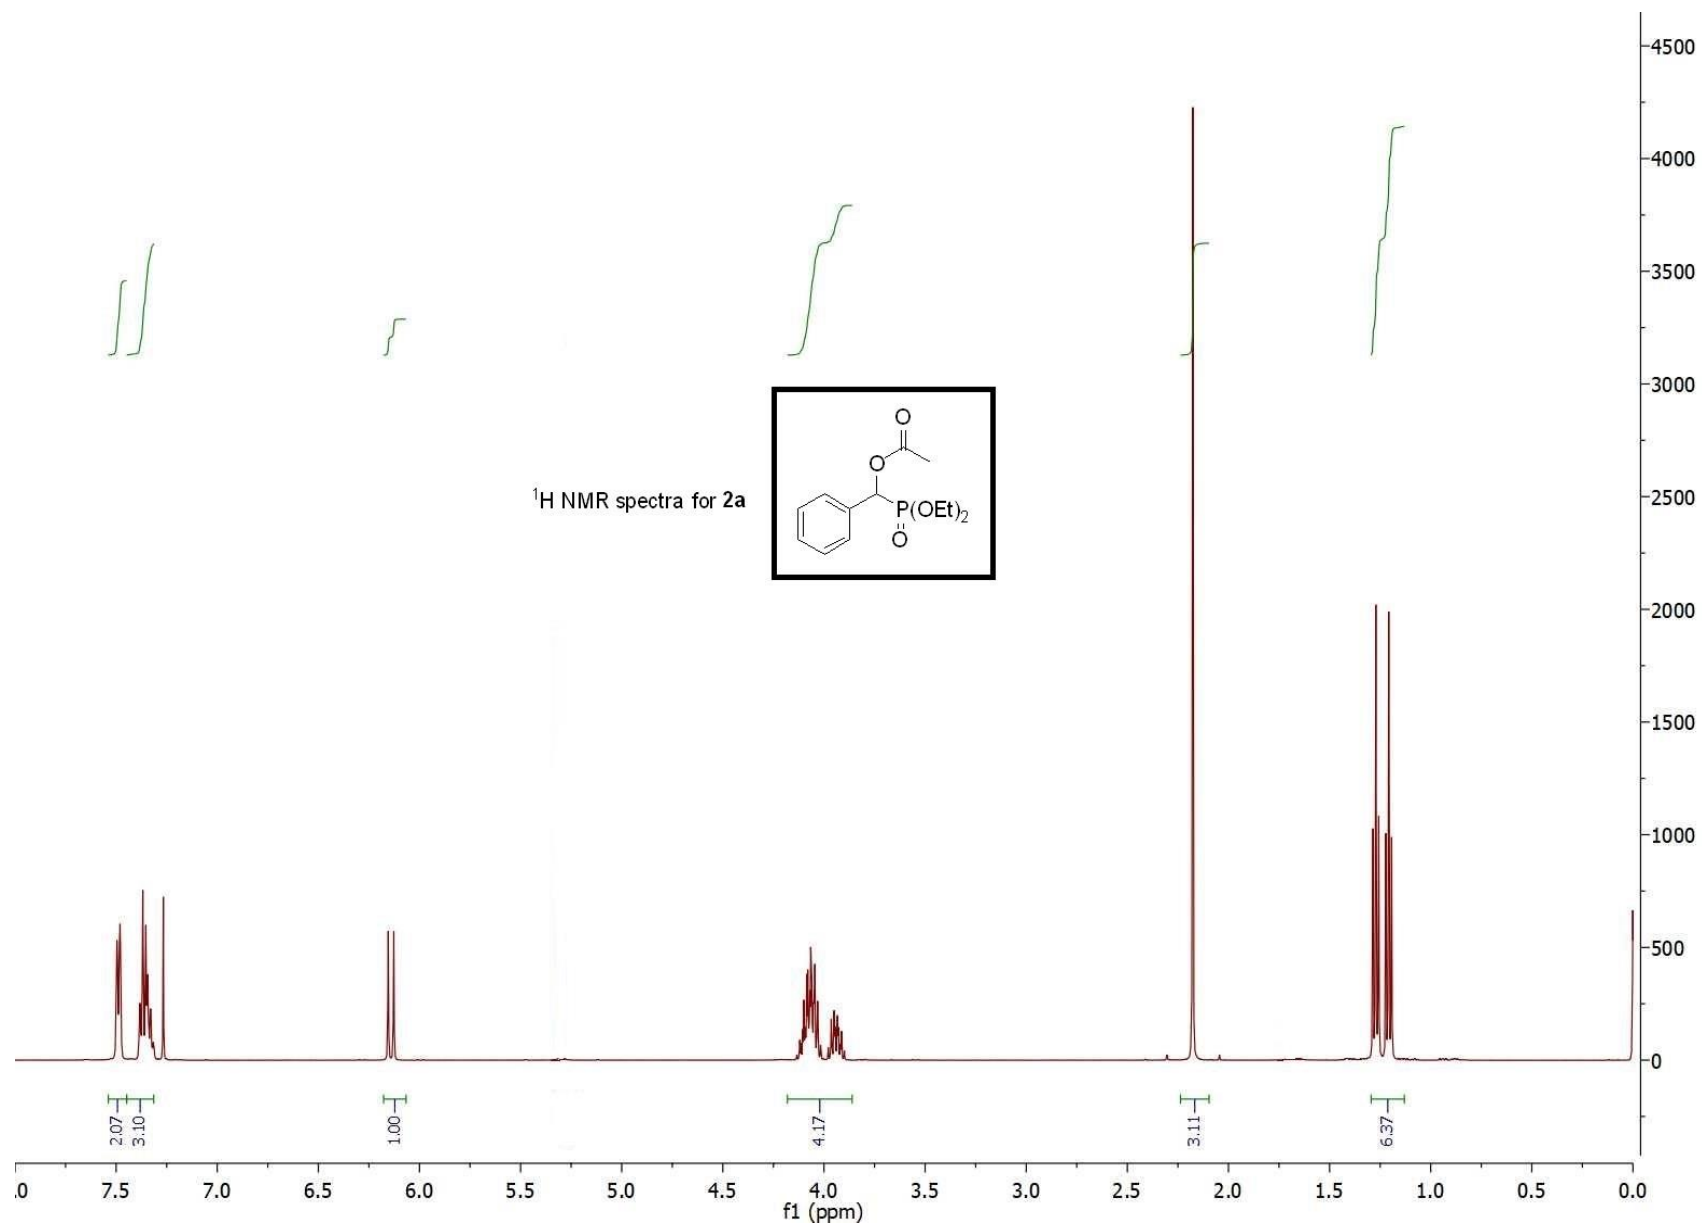

$^{31}\text{P}$  NMR spectra for **2b**

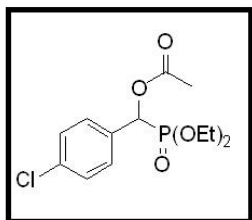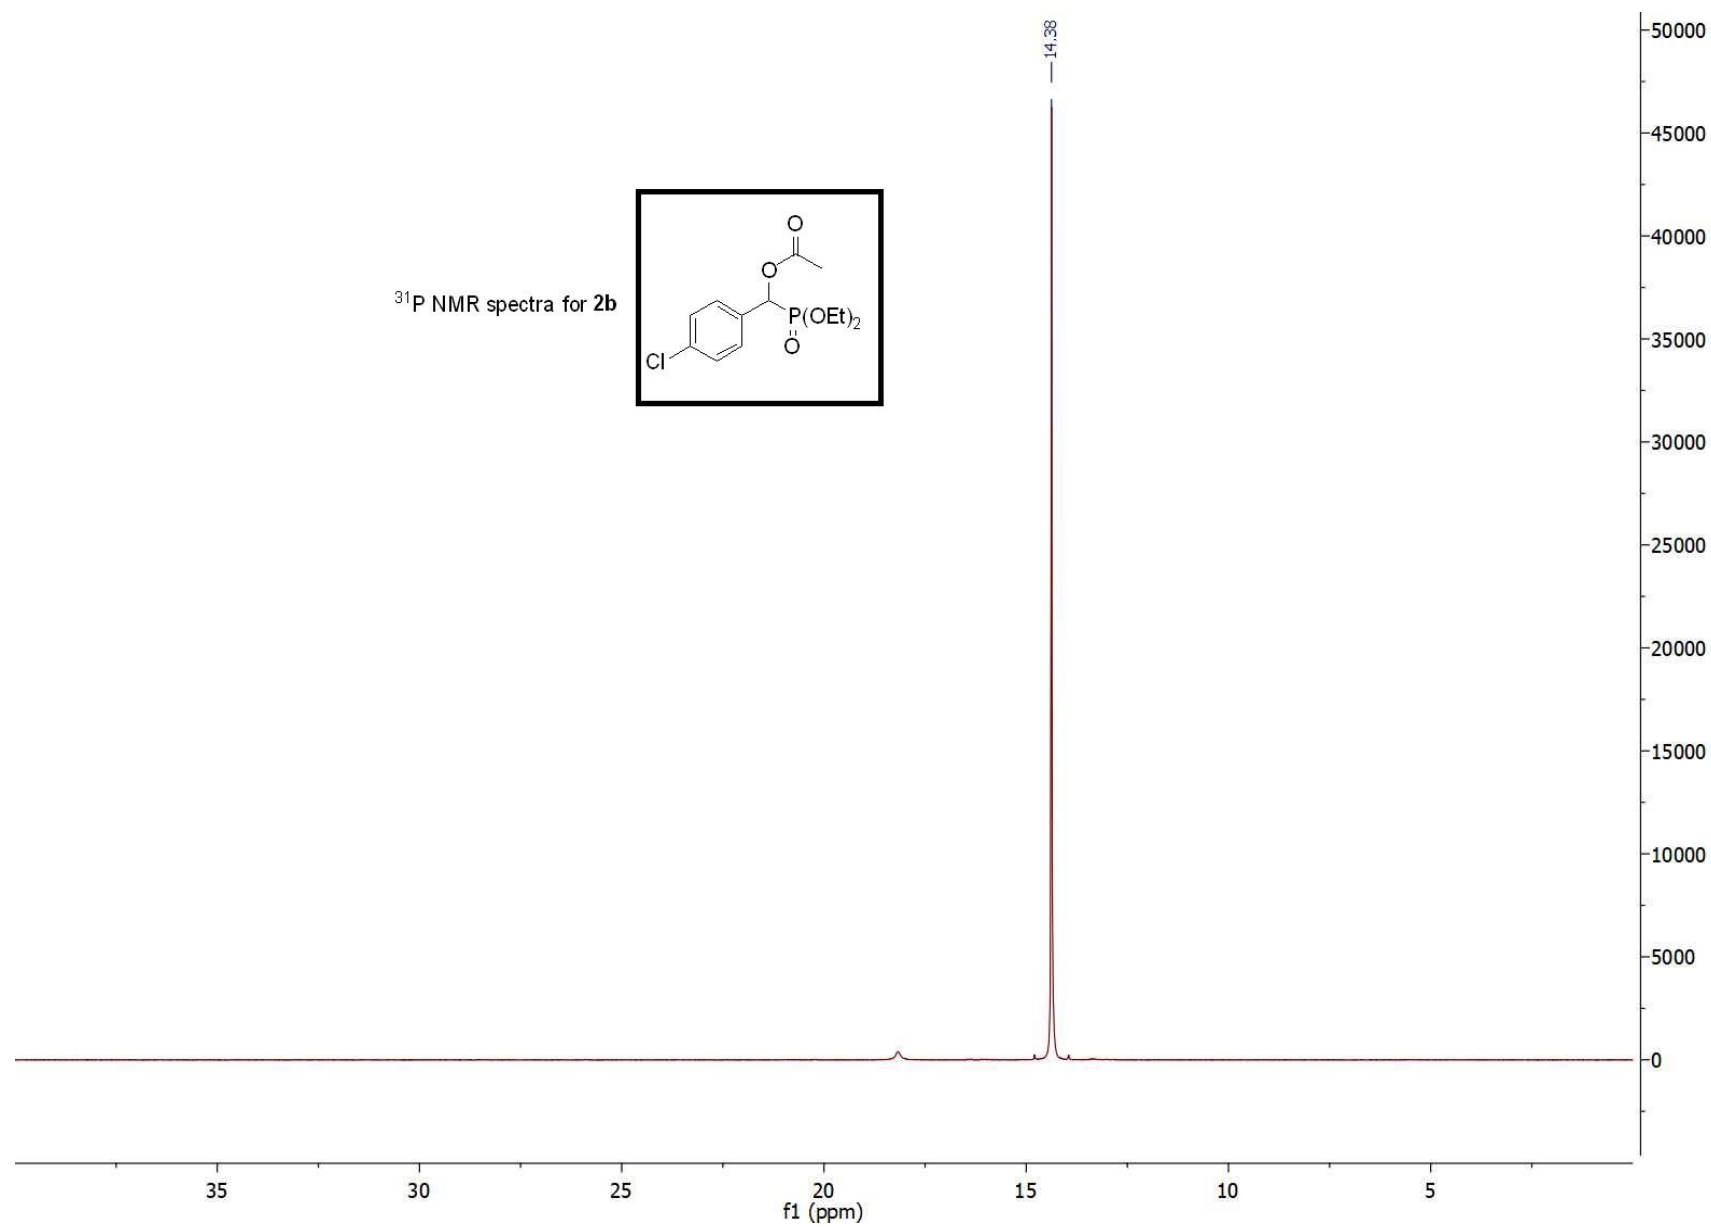

S11

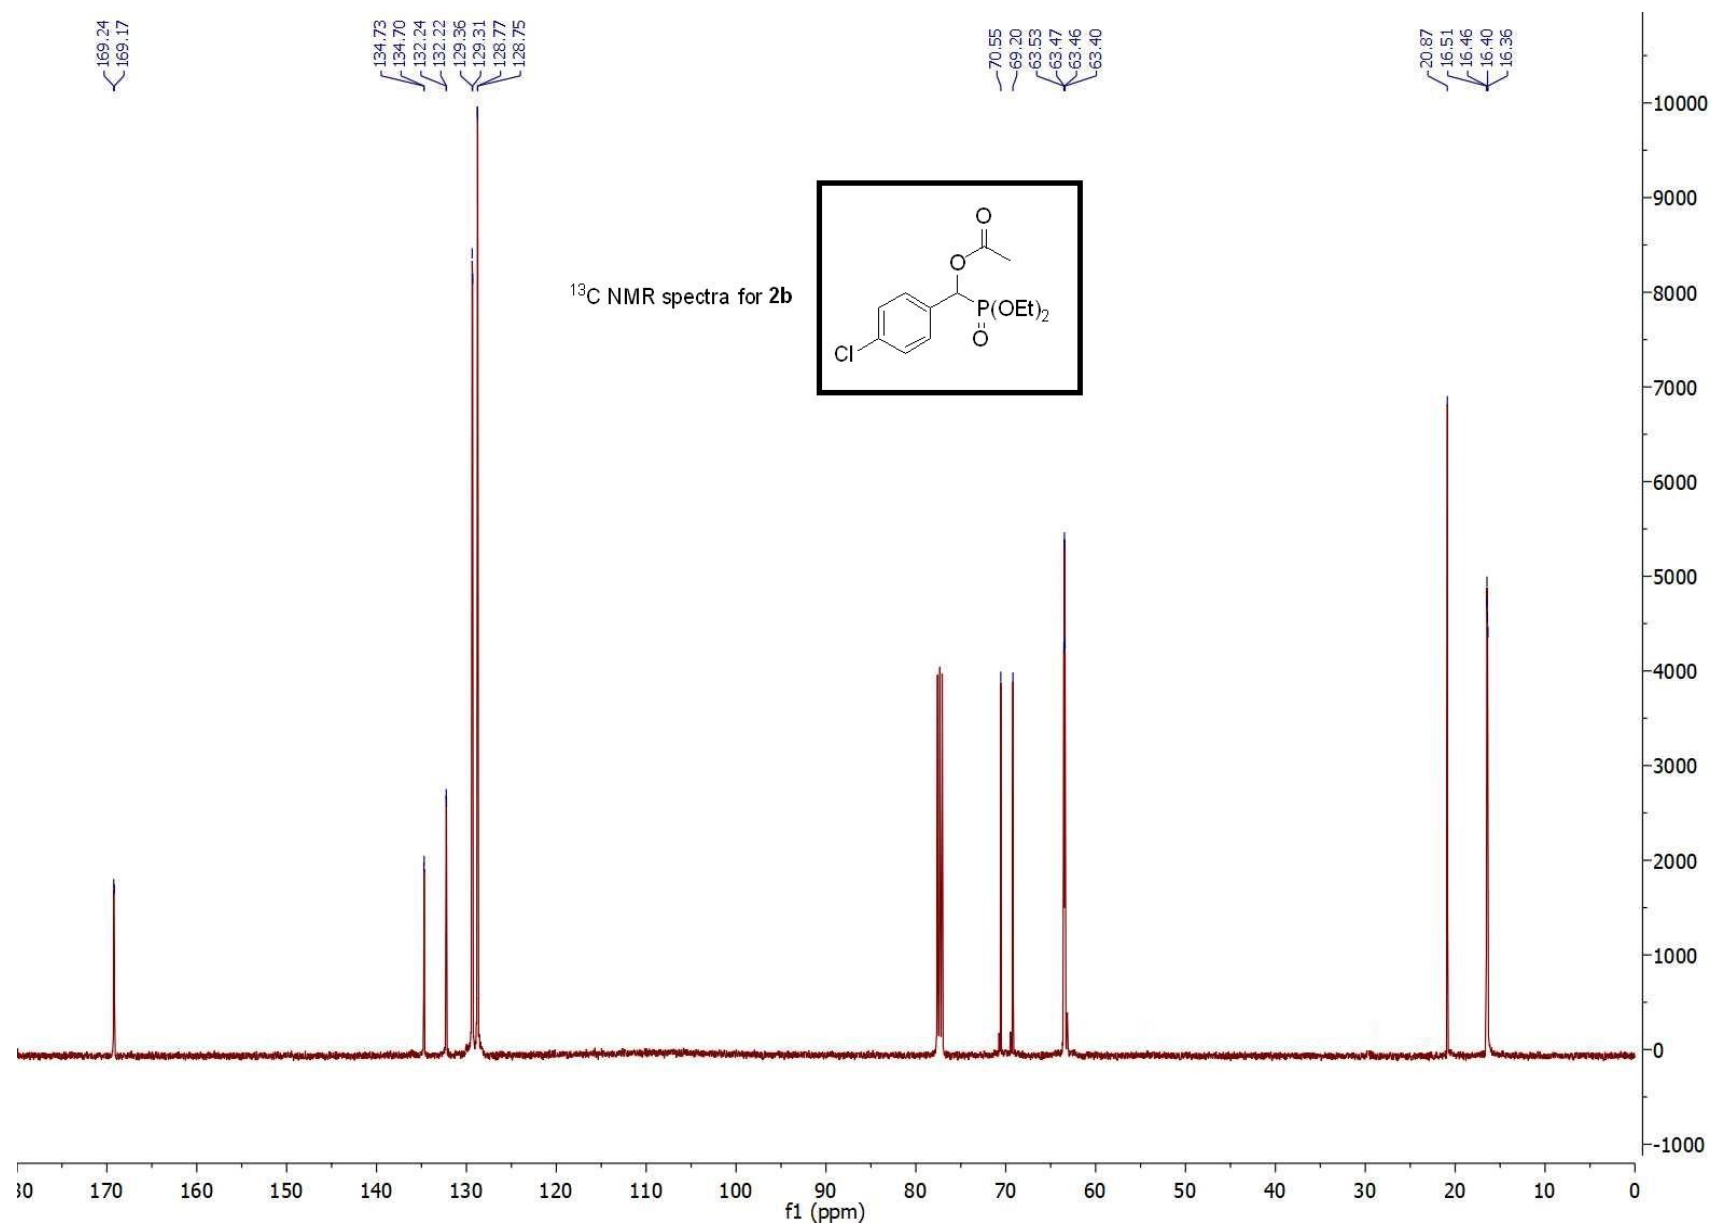

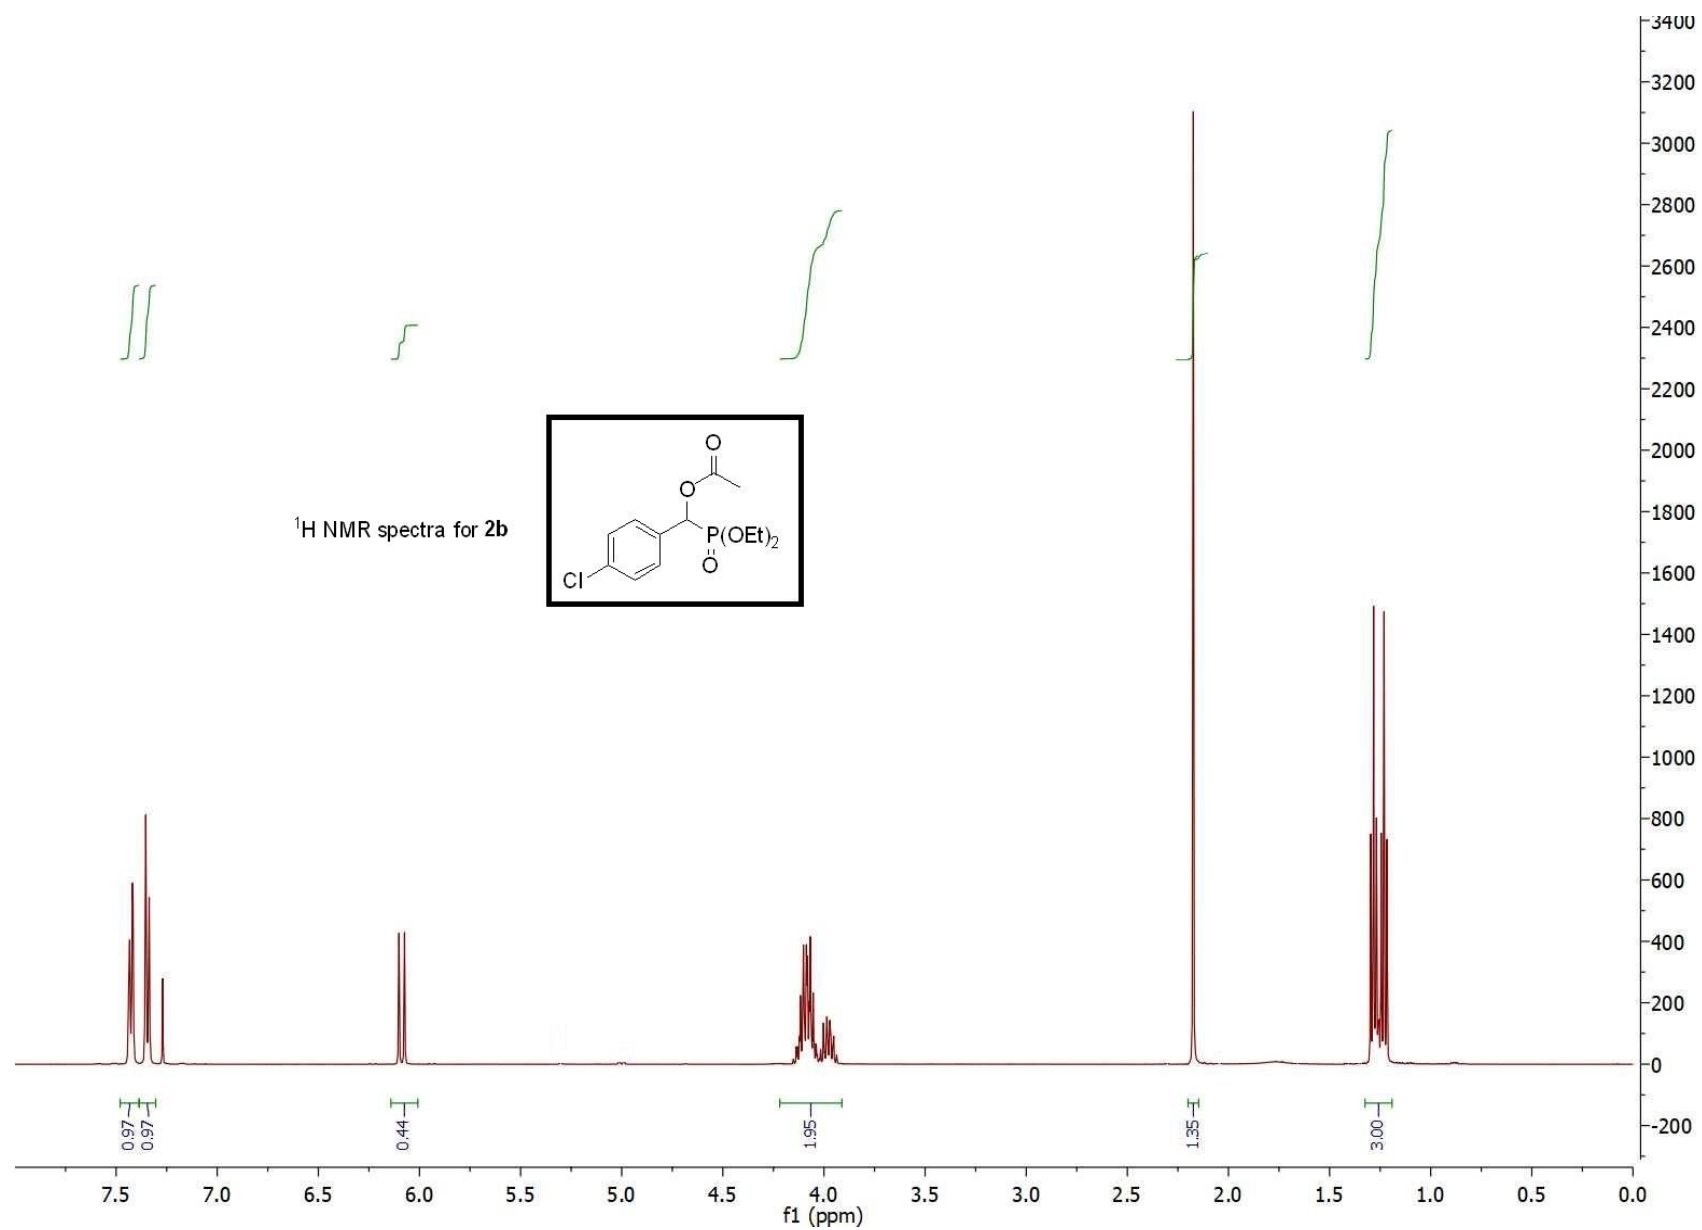

<sup>31</sup>P NMR spectra for 2c

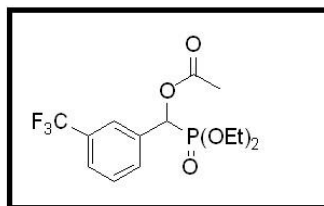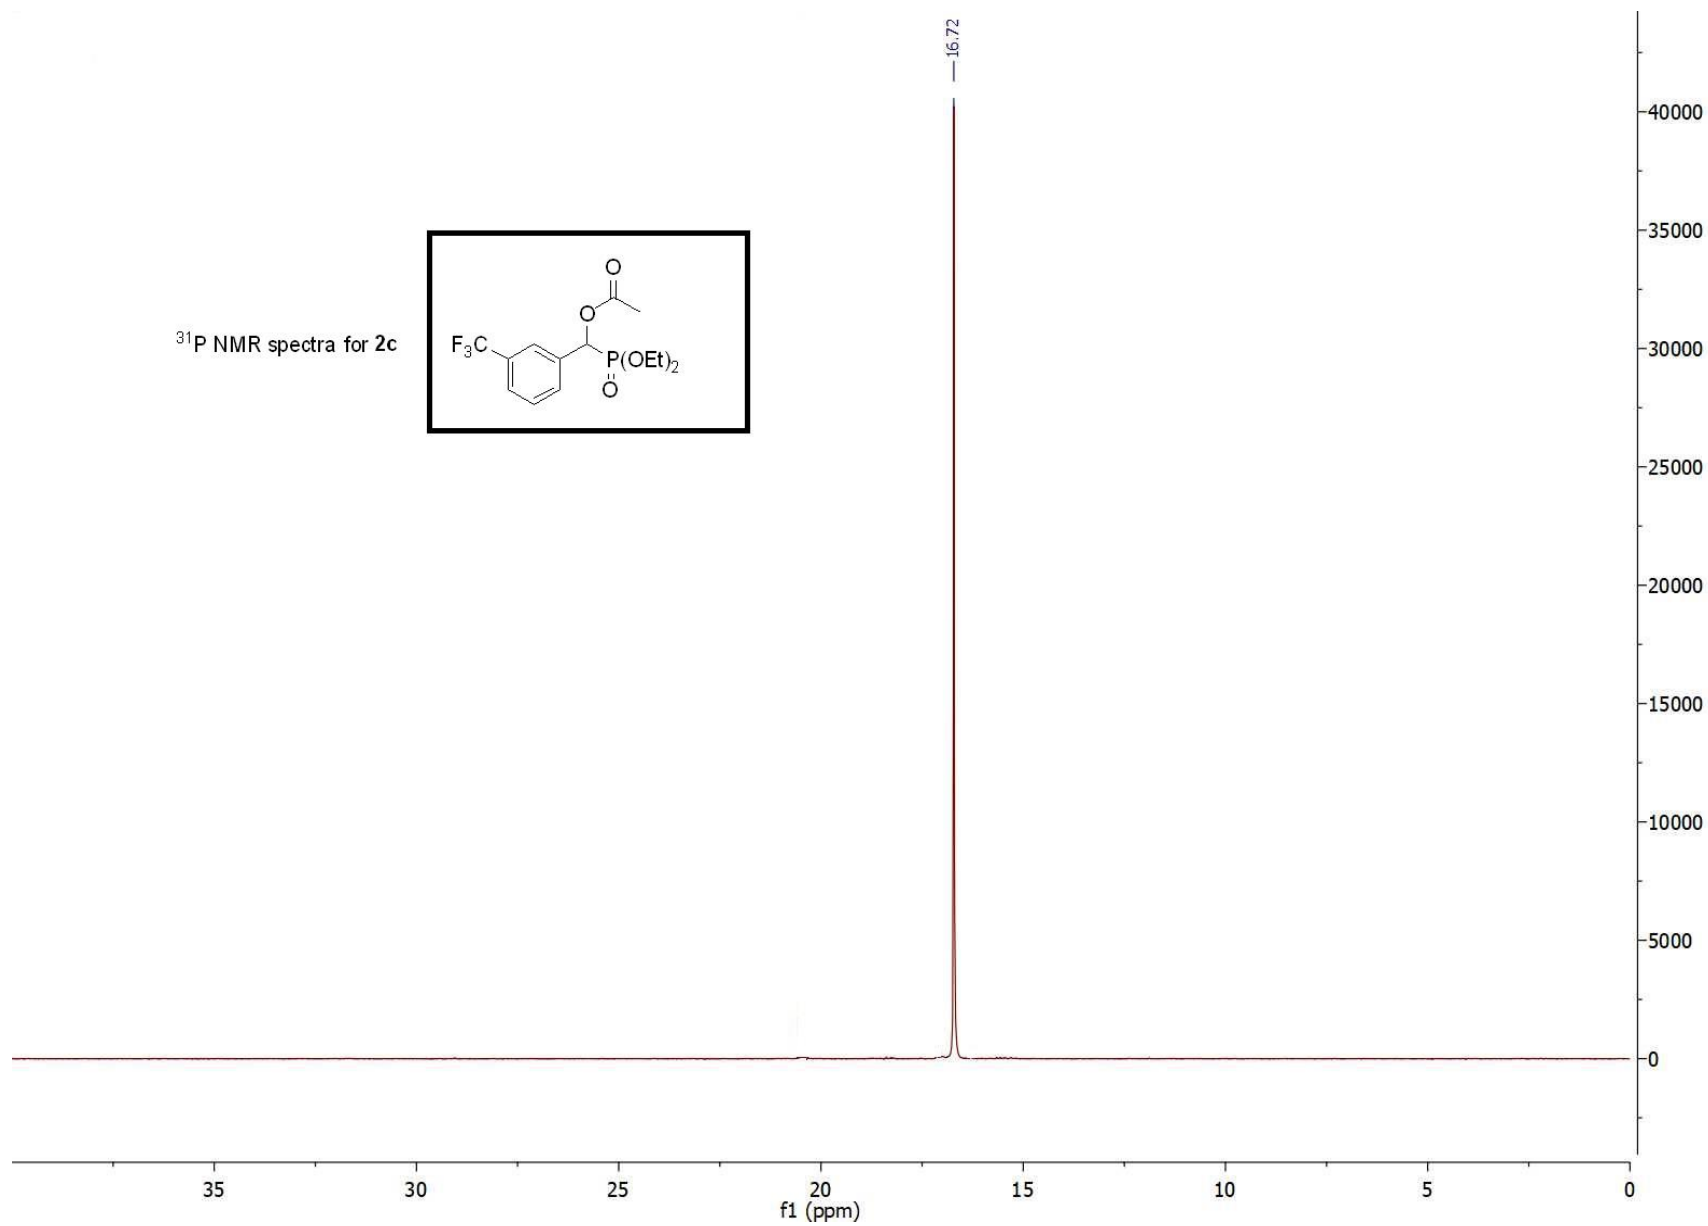

S14

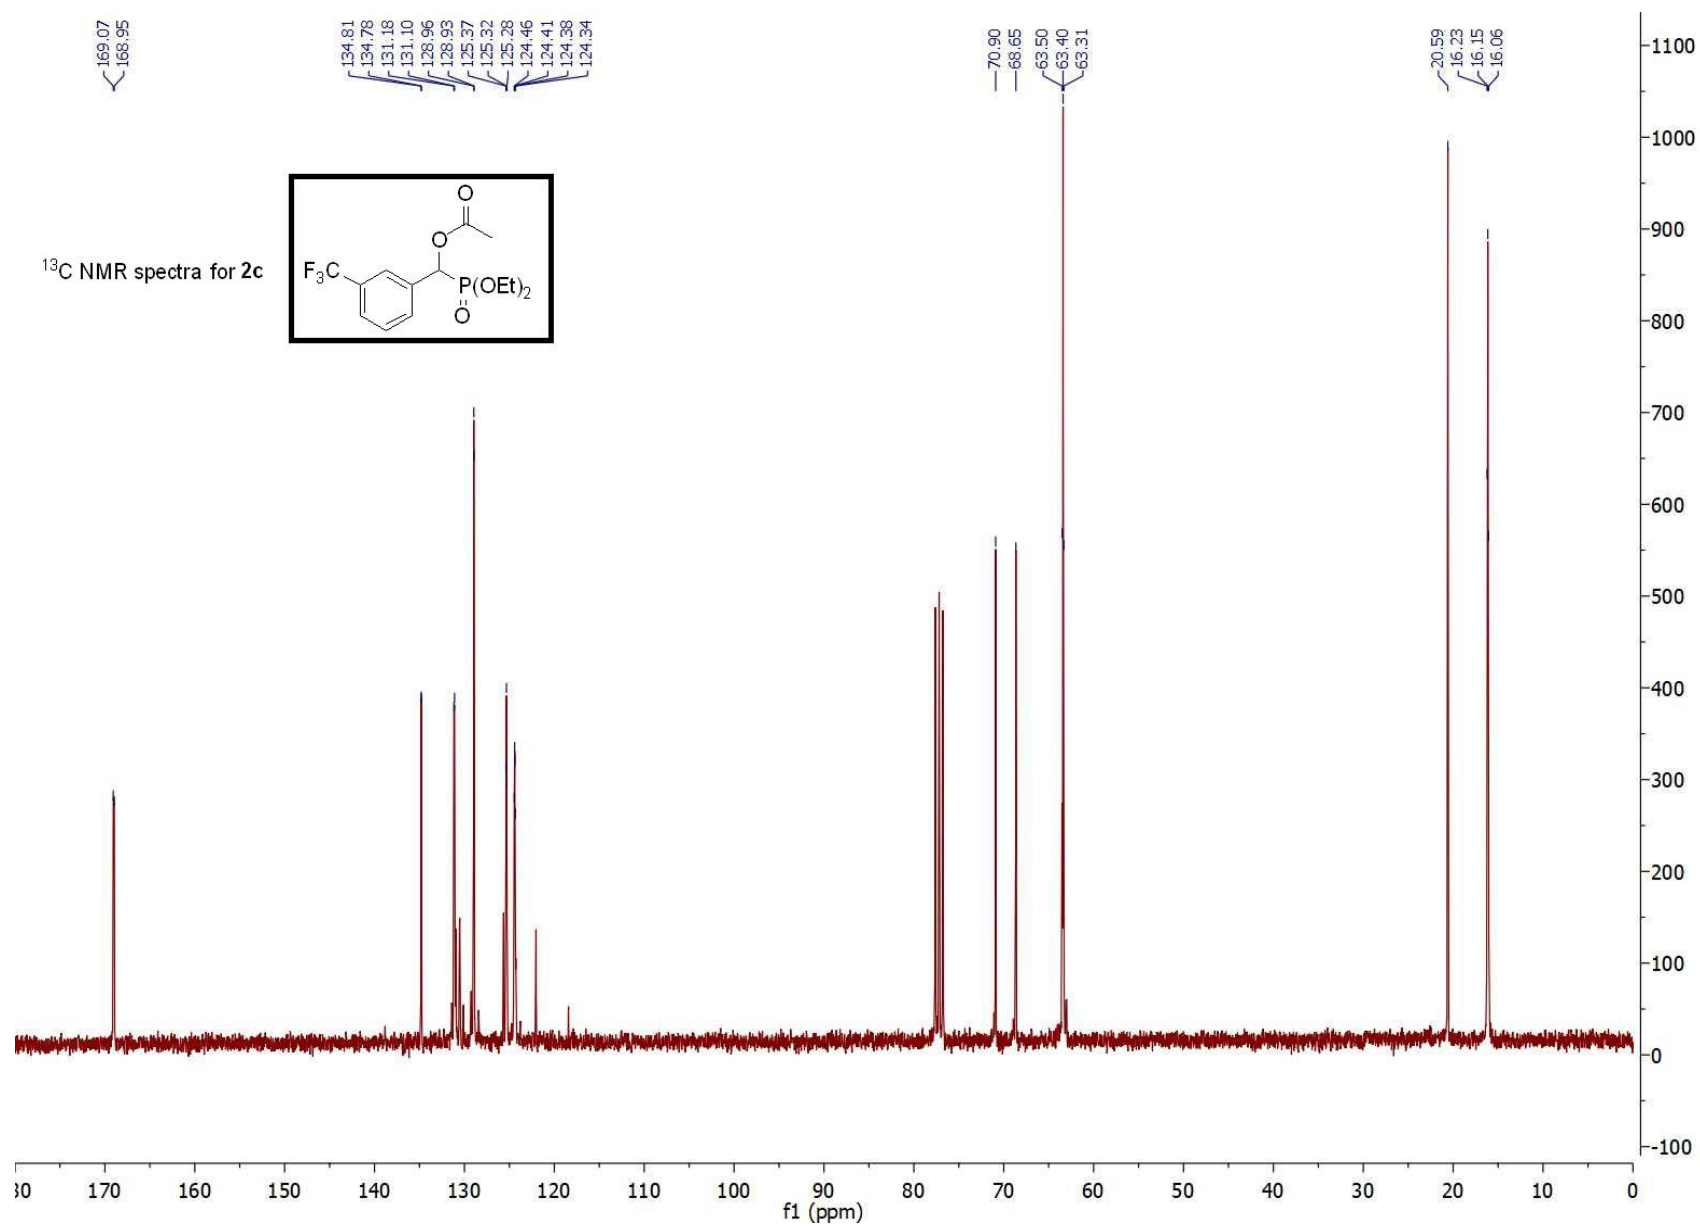

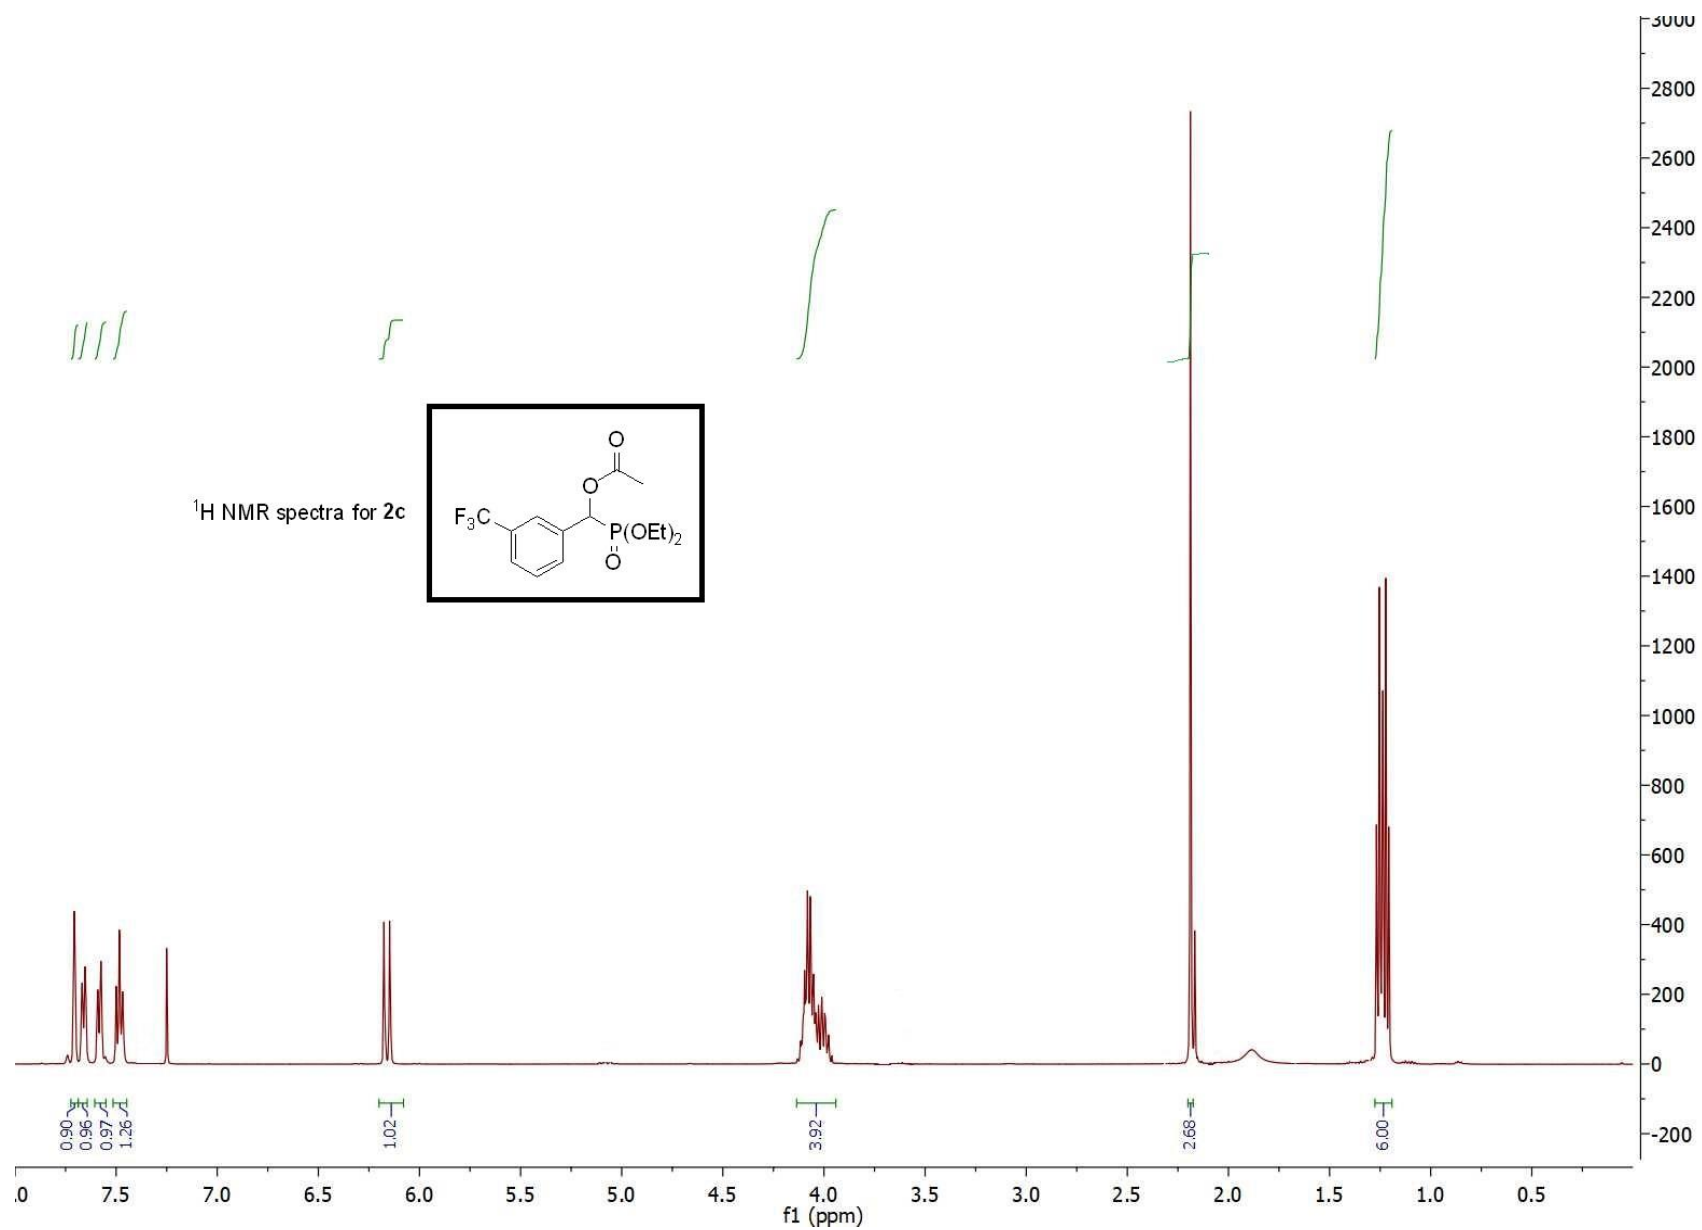



$^{31}\text{P}$  NMR spectra for 2d

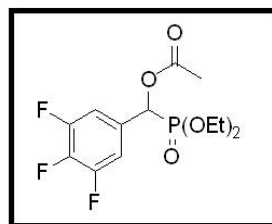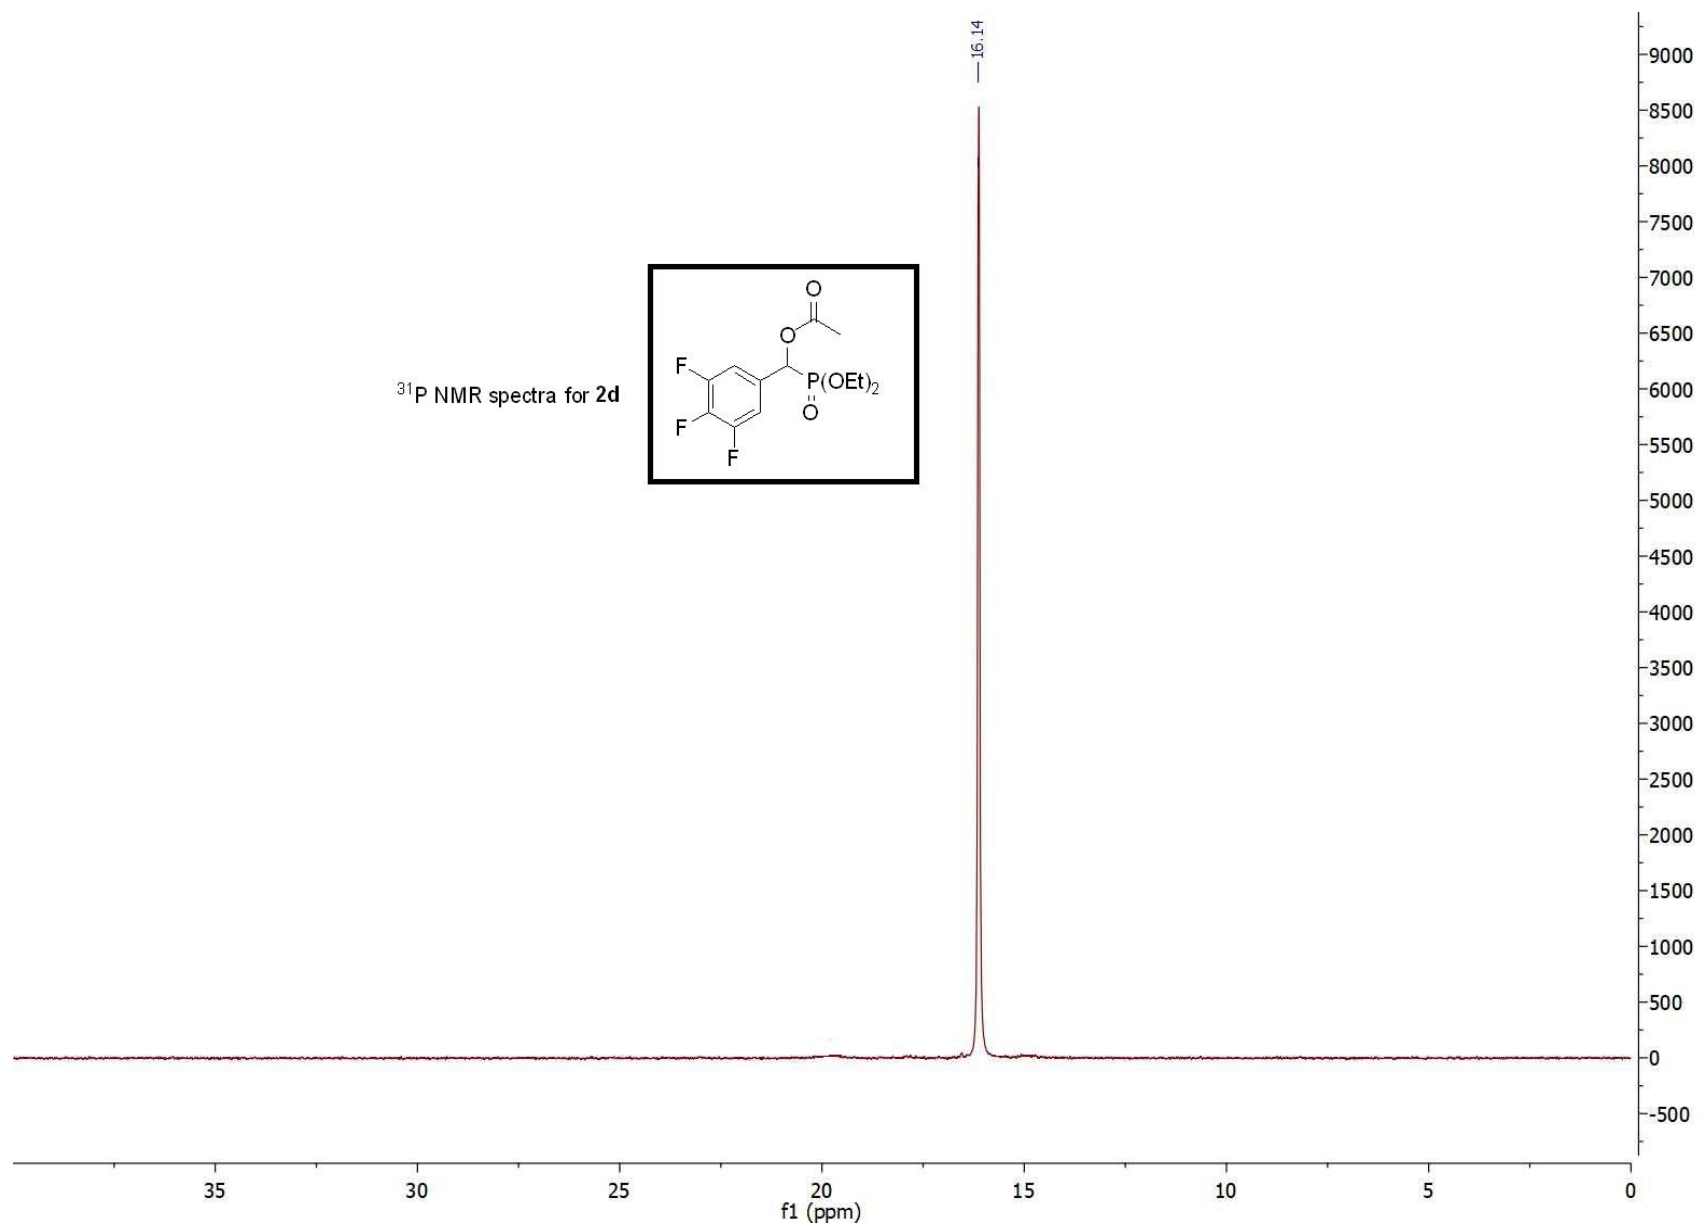

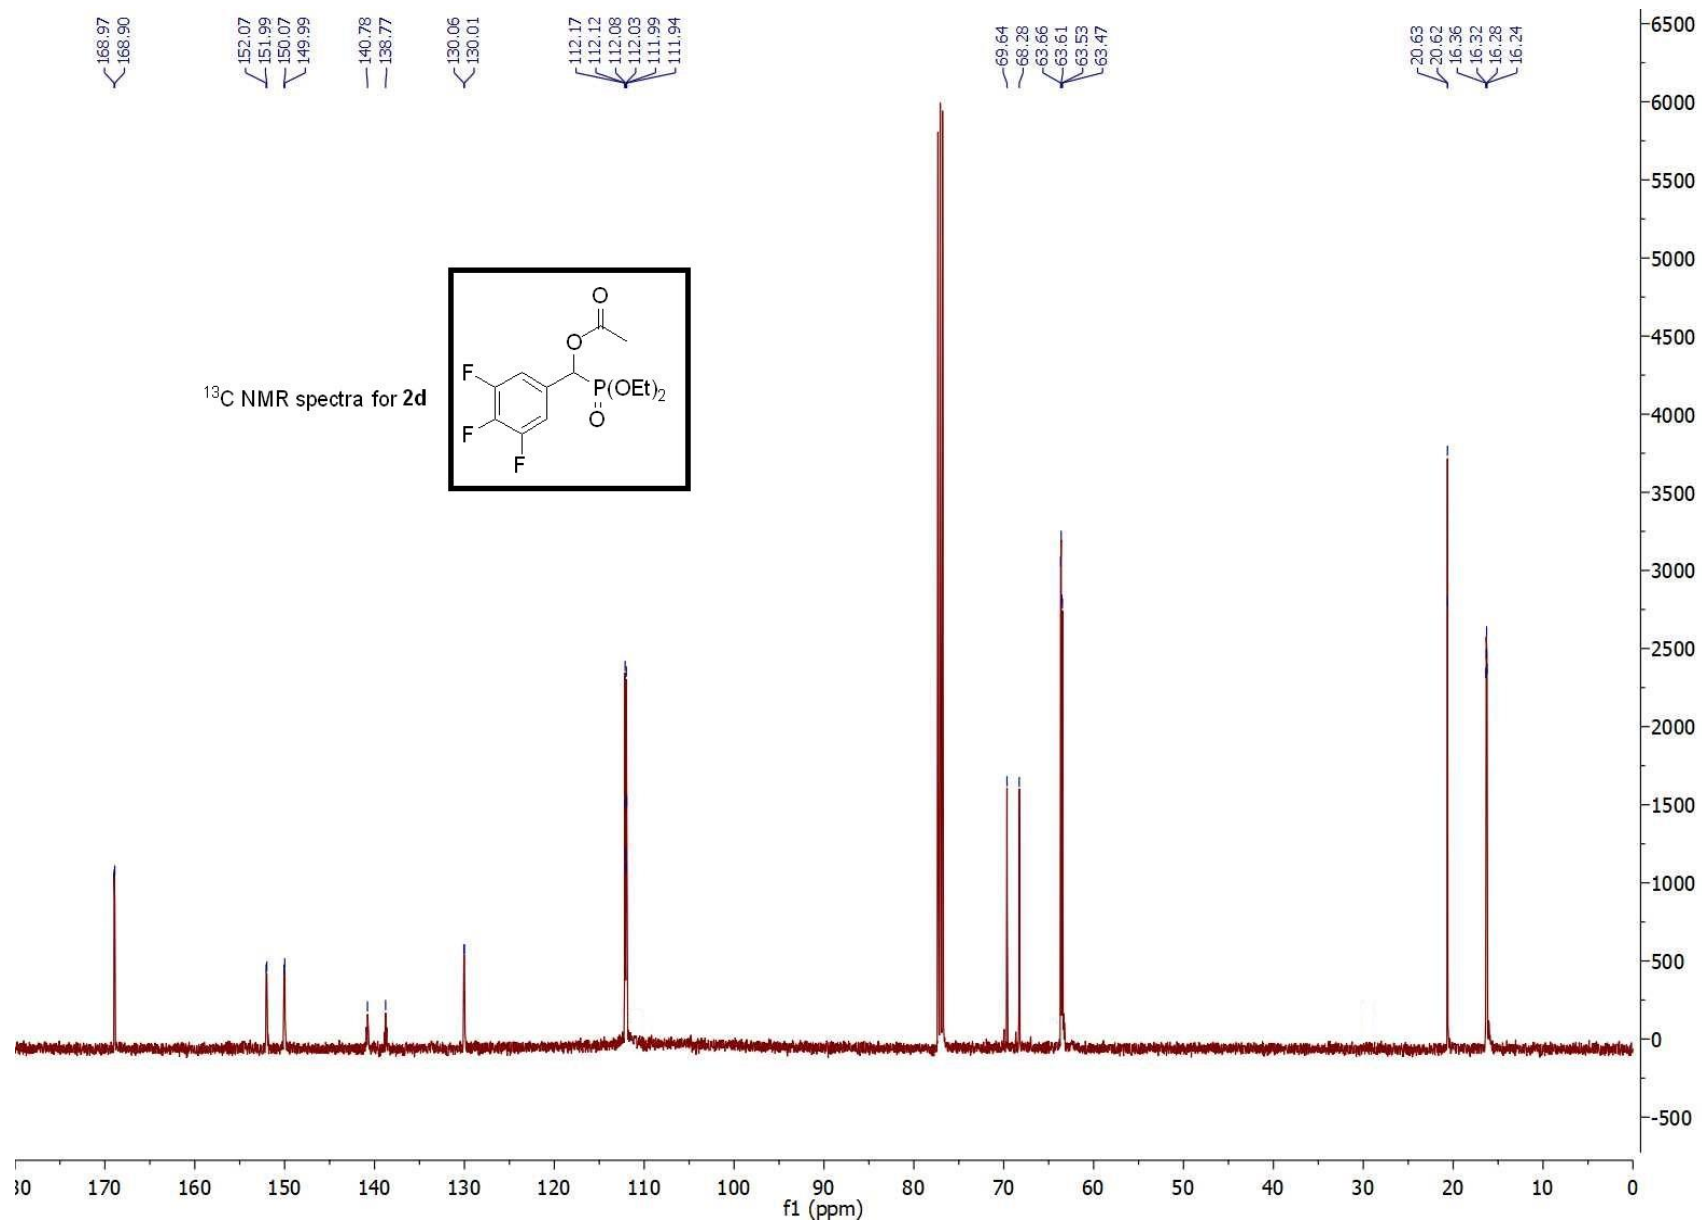

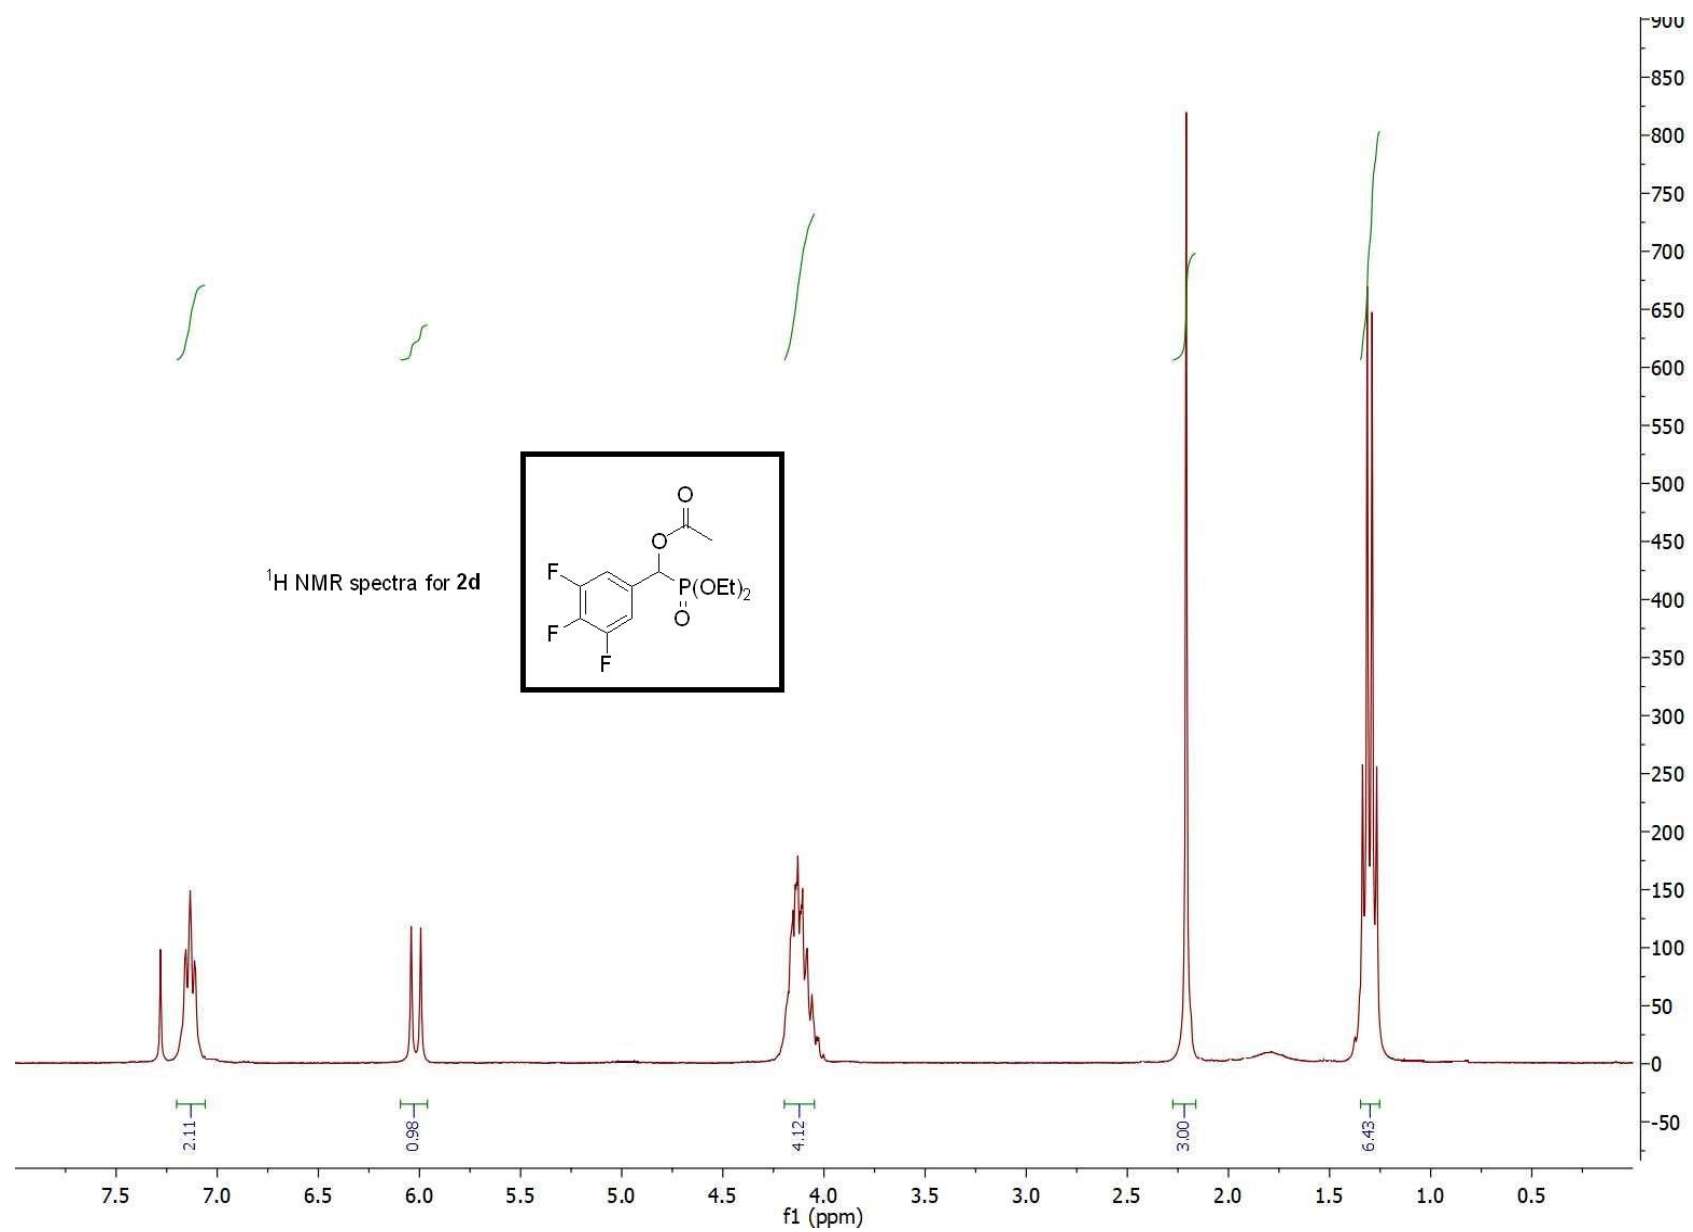

$^{31}\text{P}$  NMR spectra for 2e

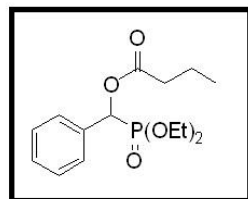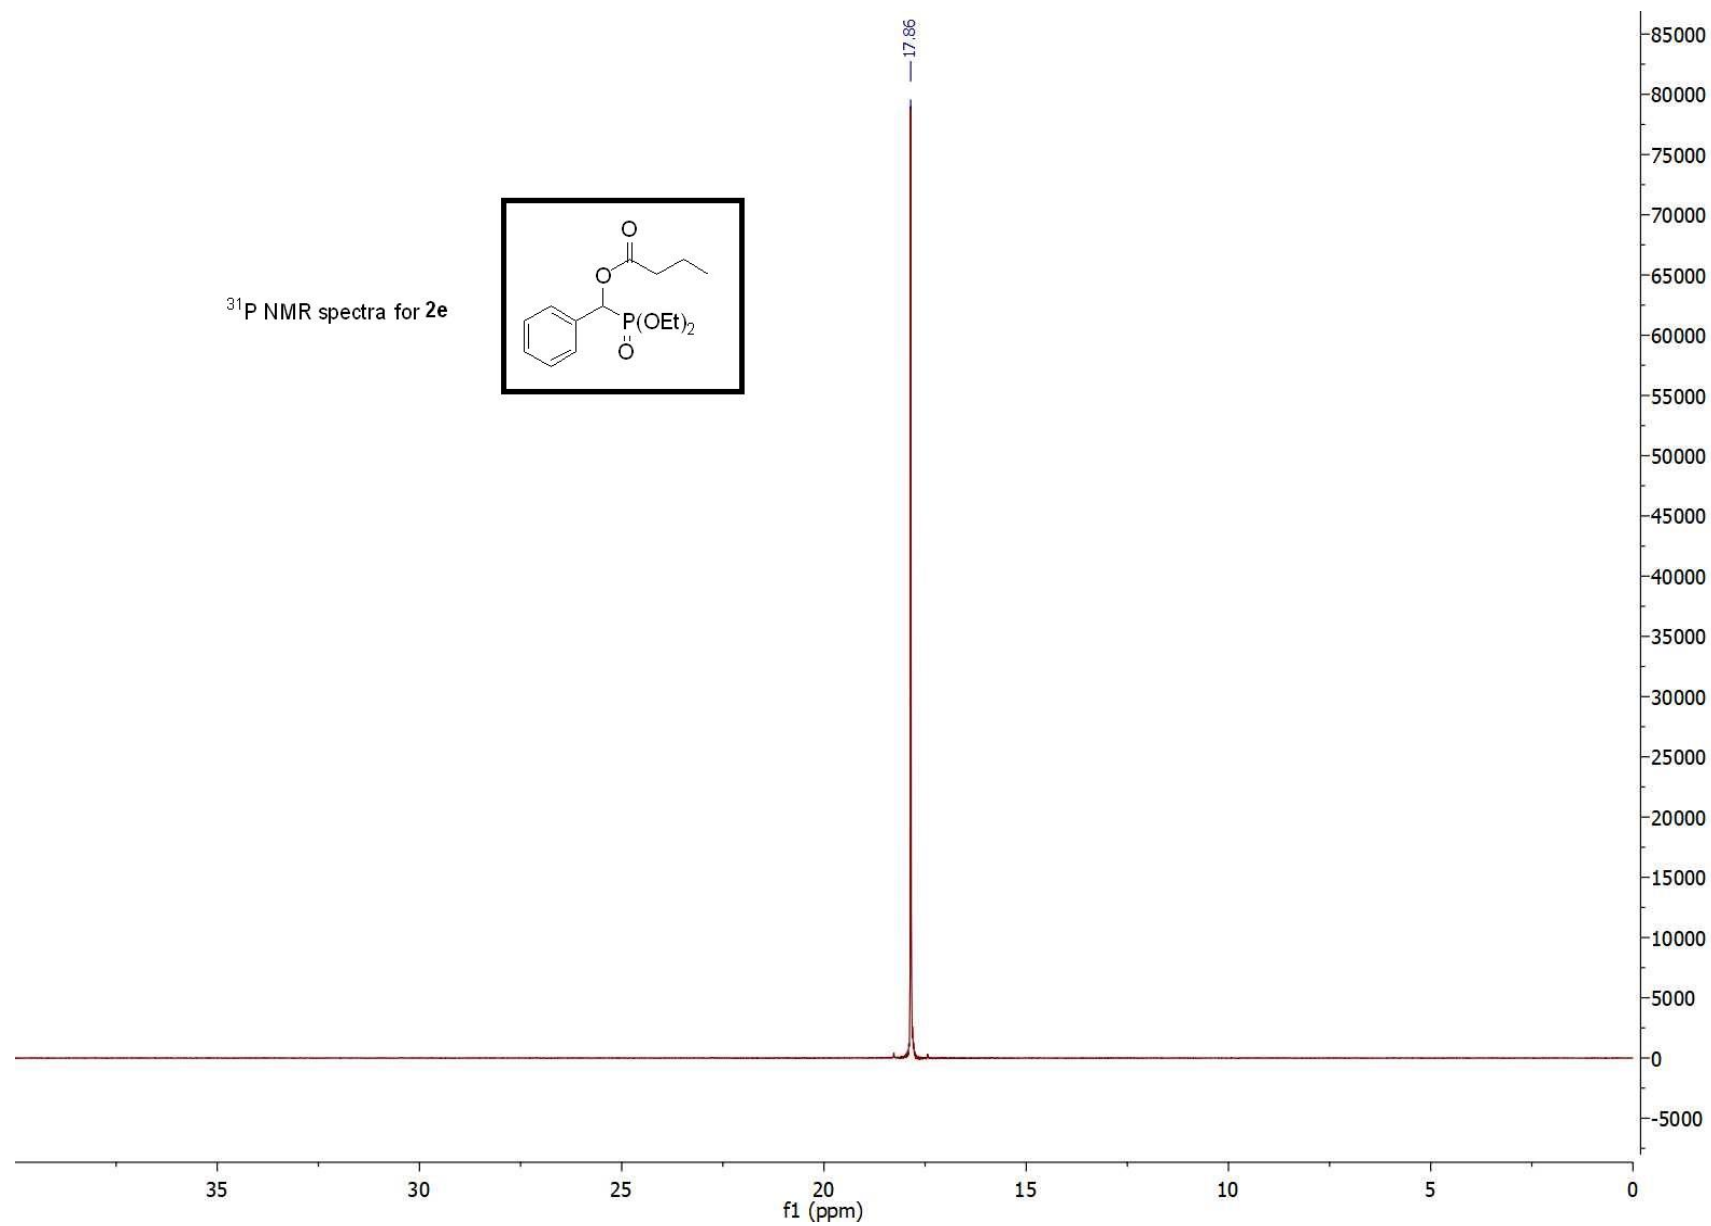

S20

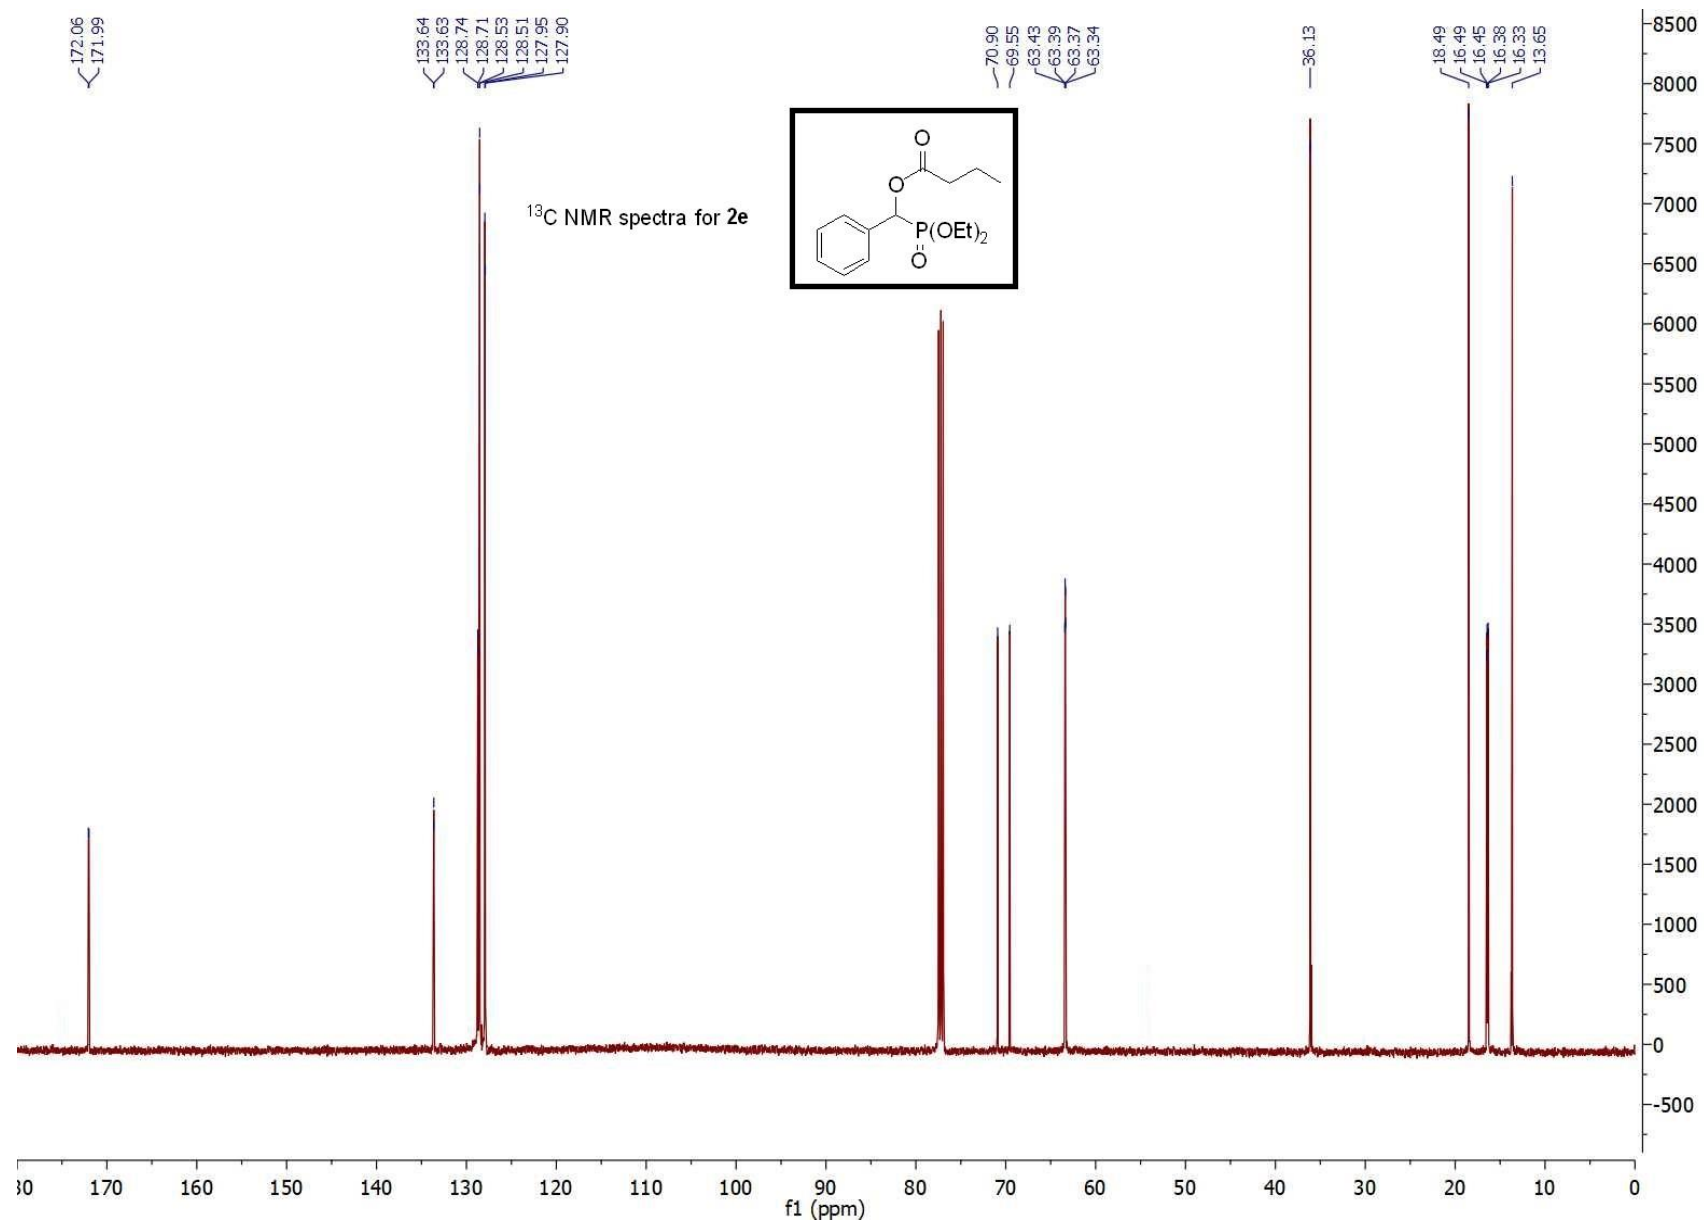

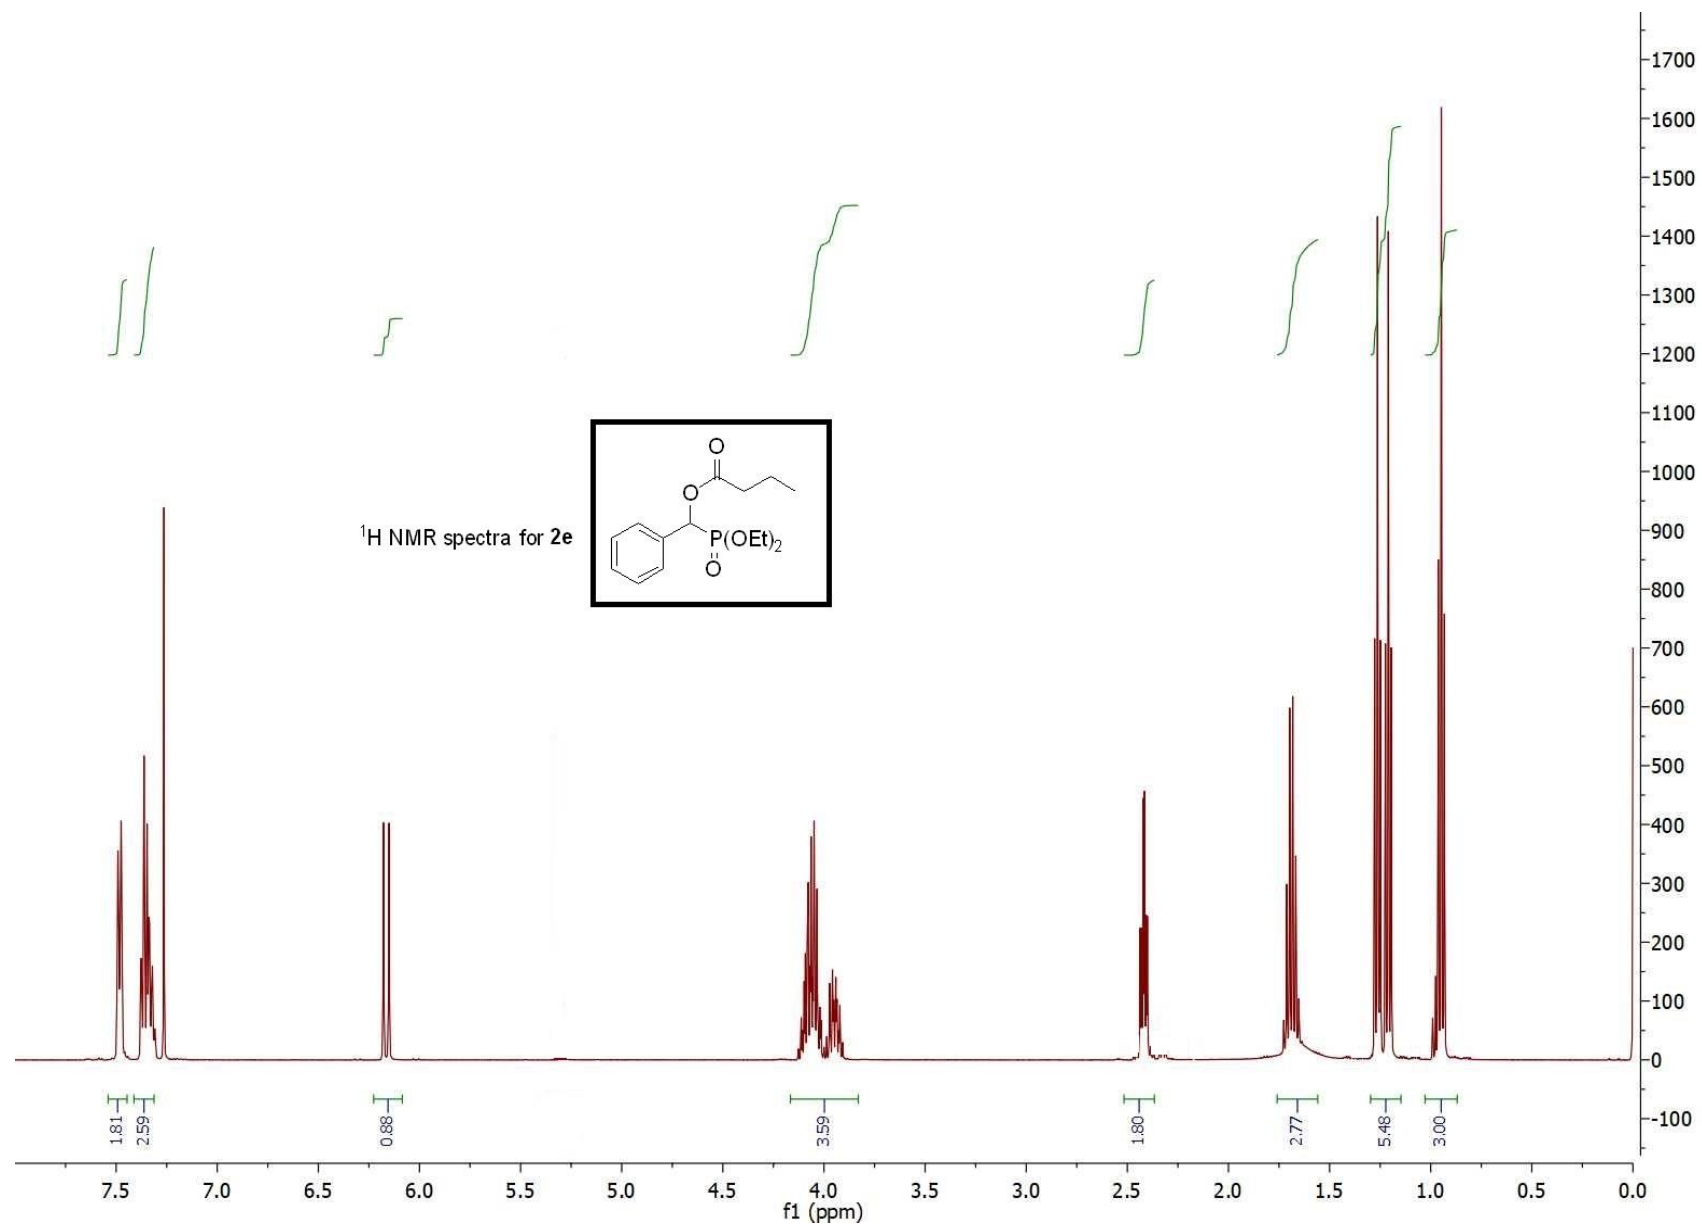

<sup>31</sup>P NMR spectra for 2f

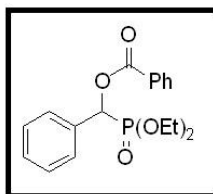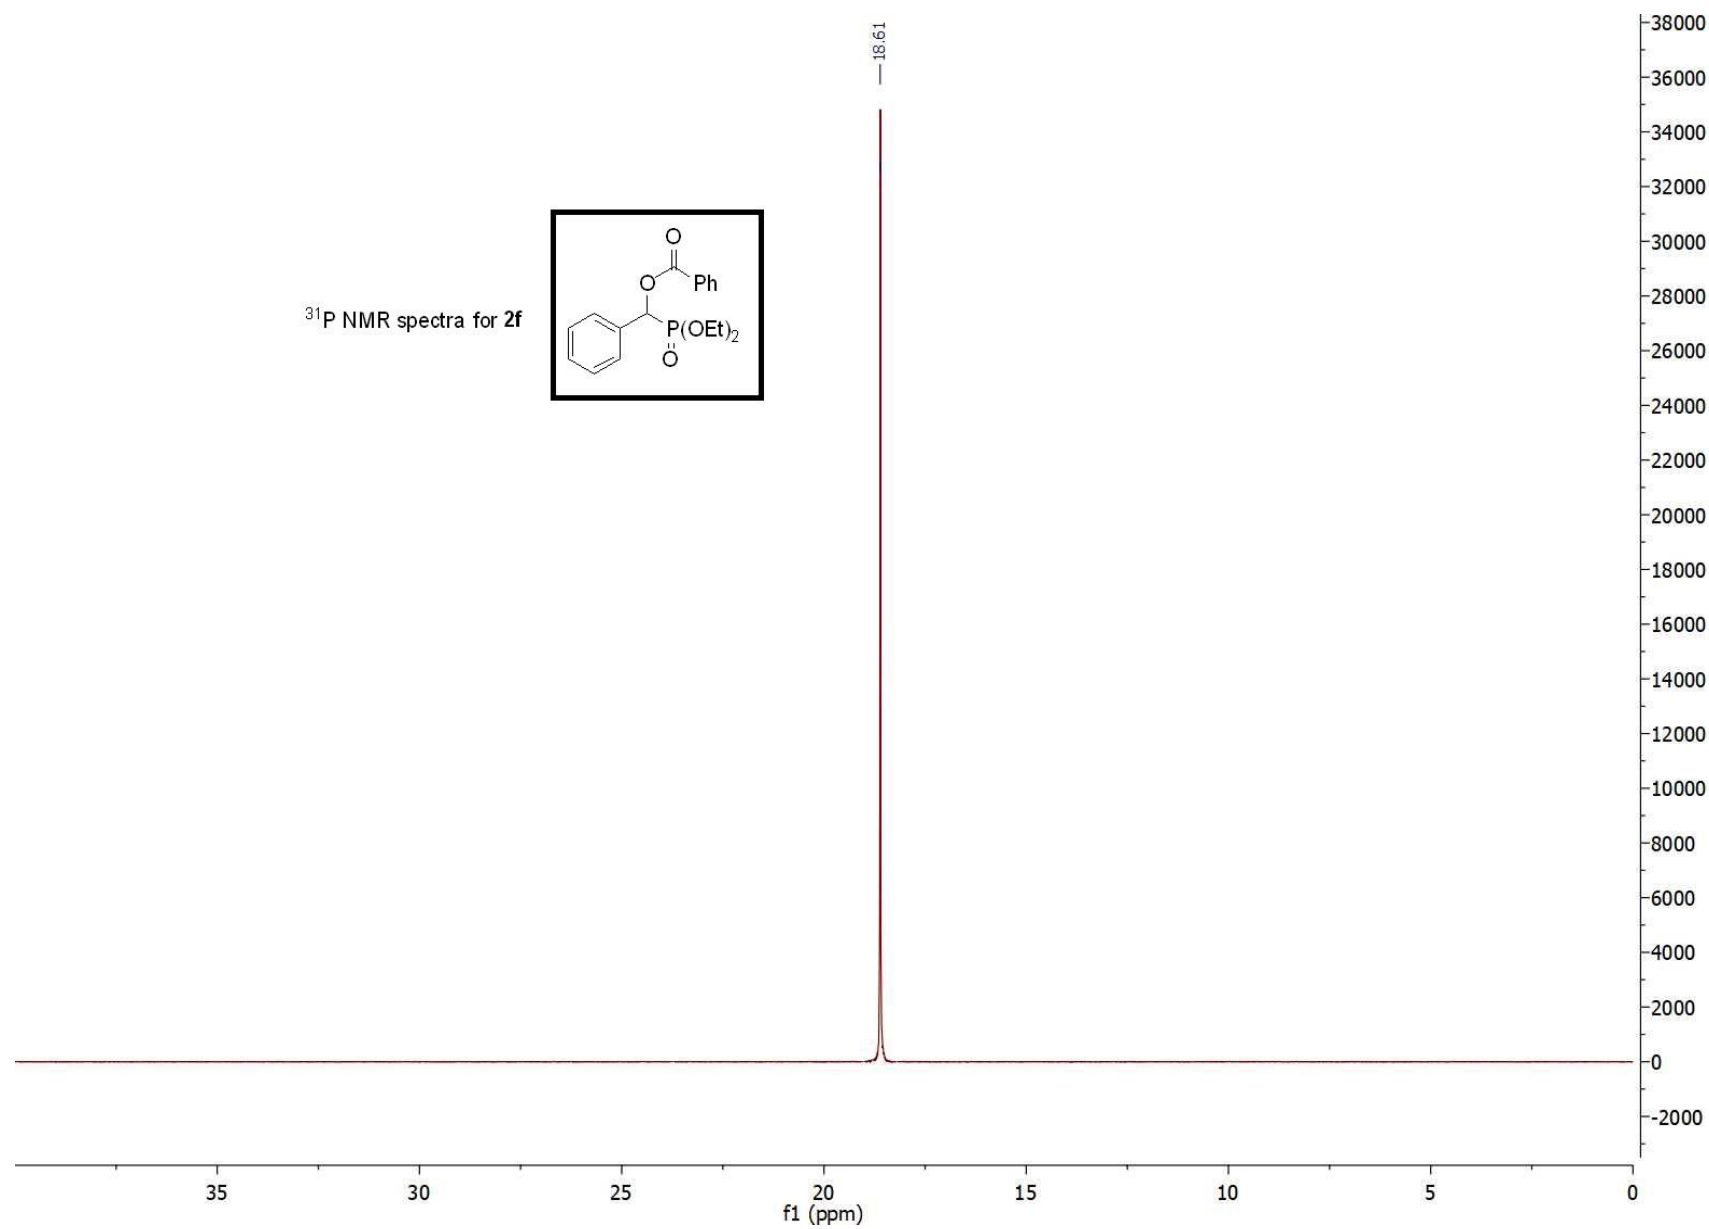

S23

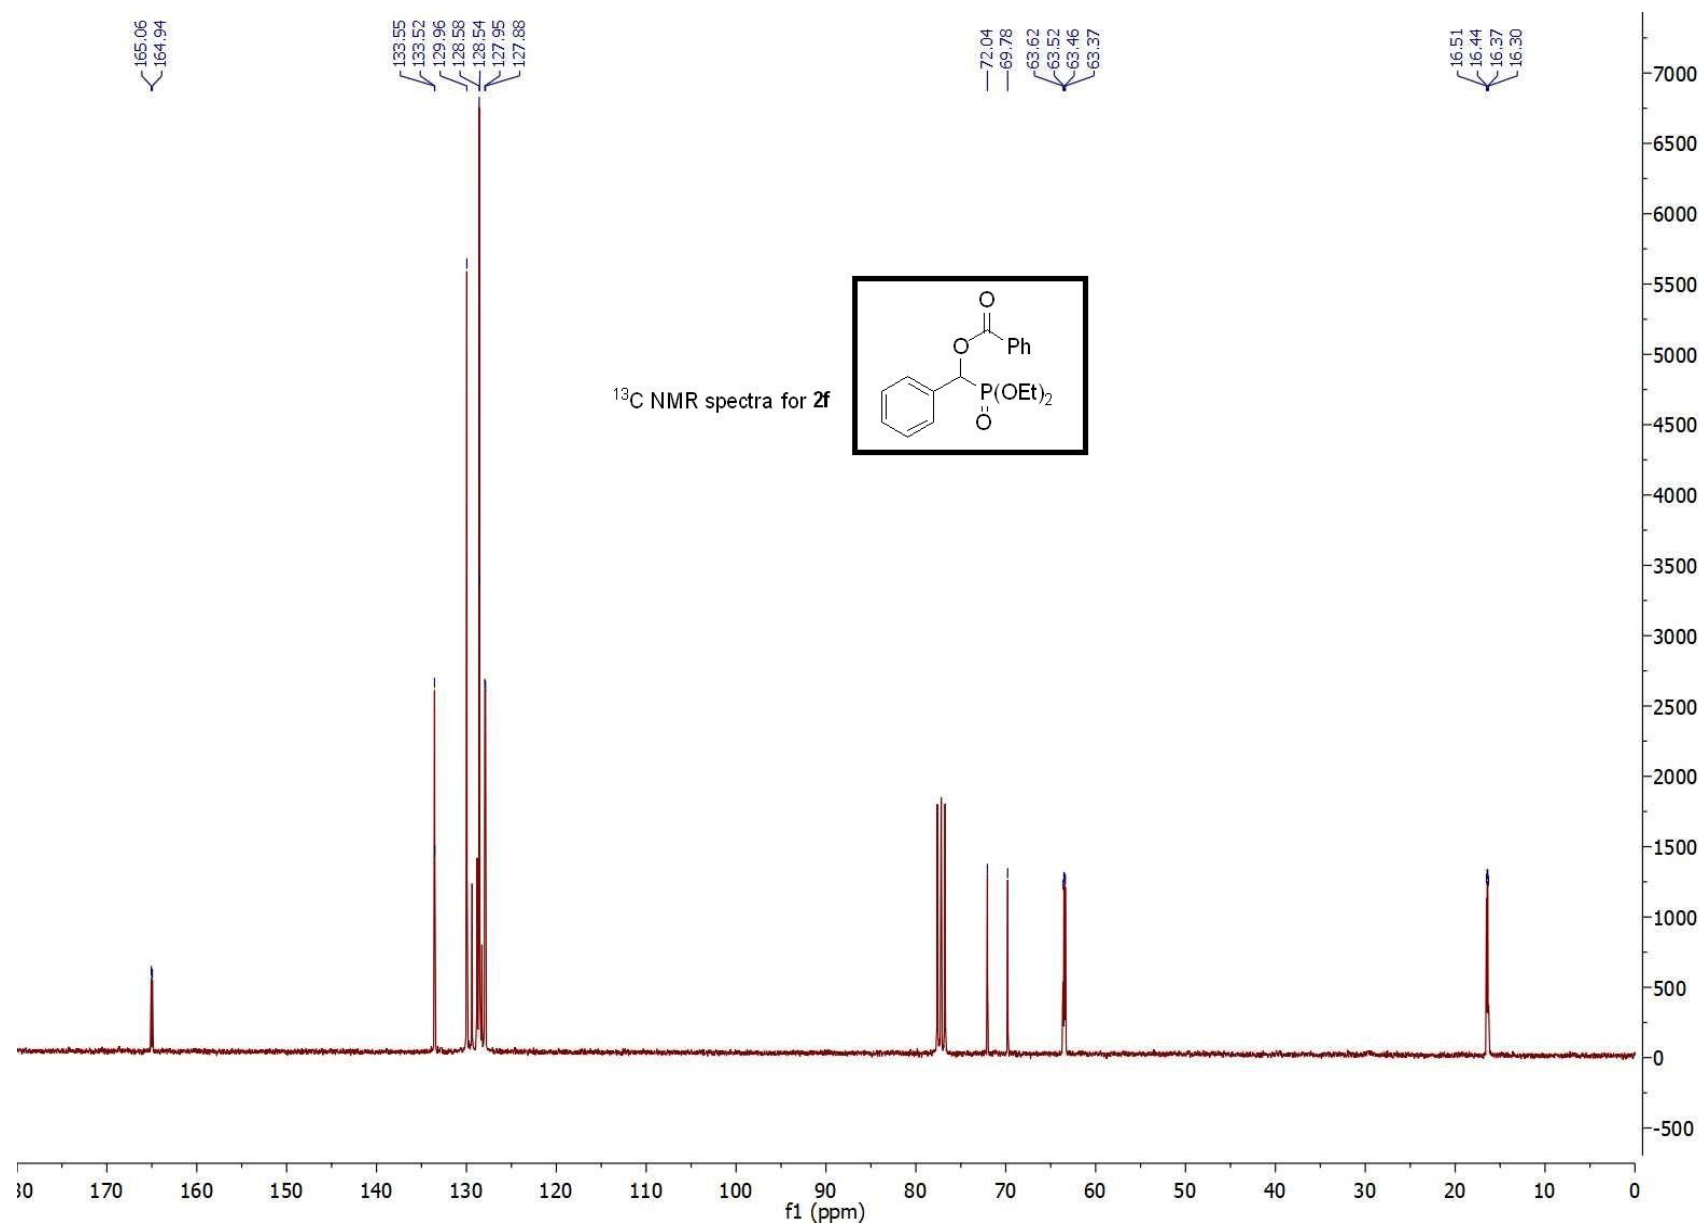



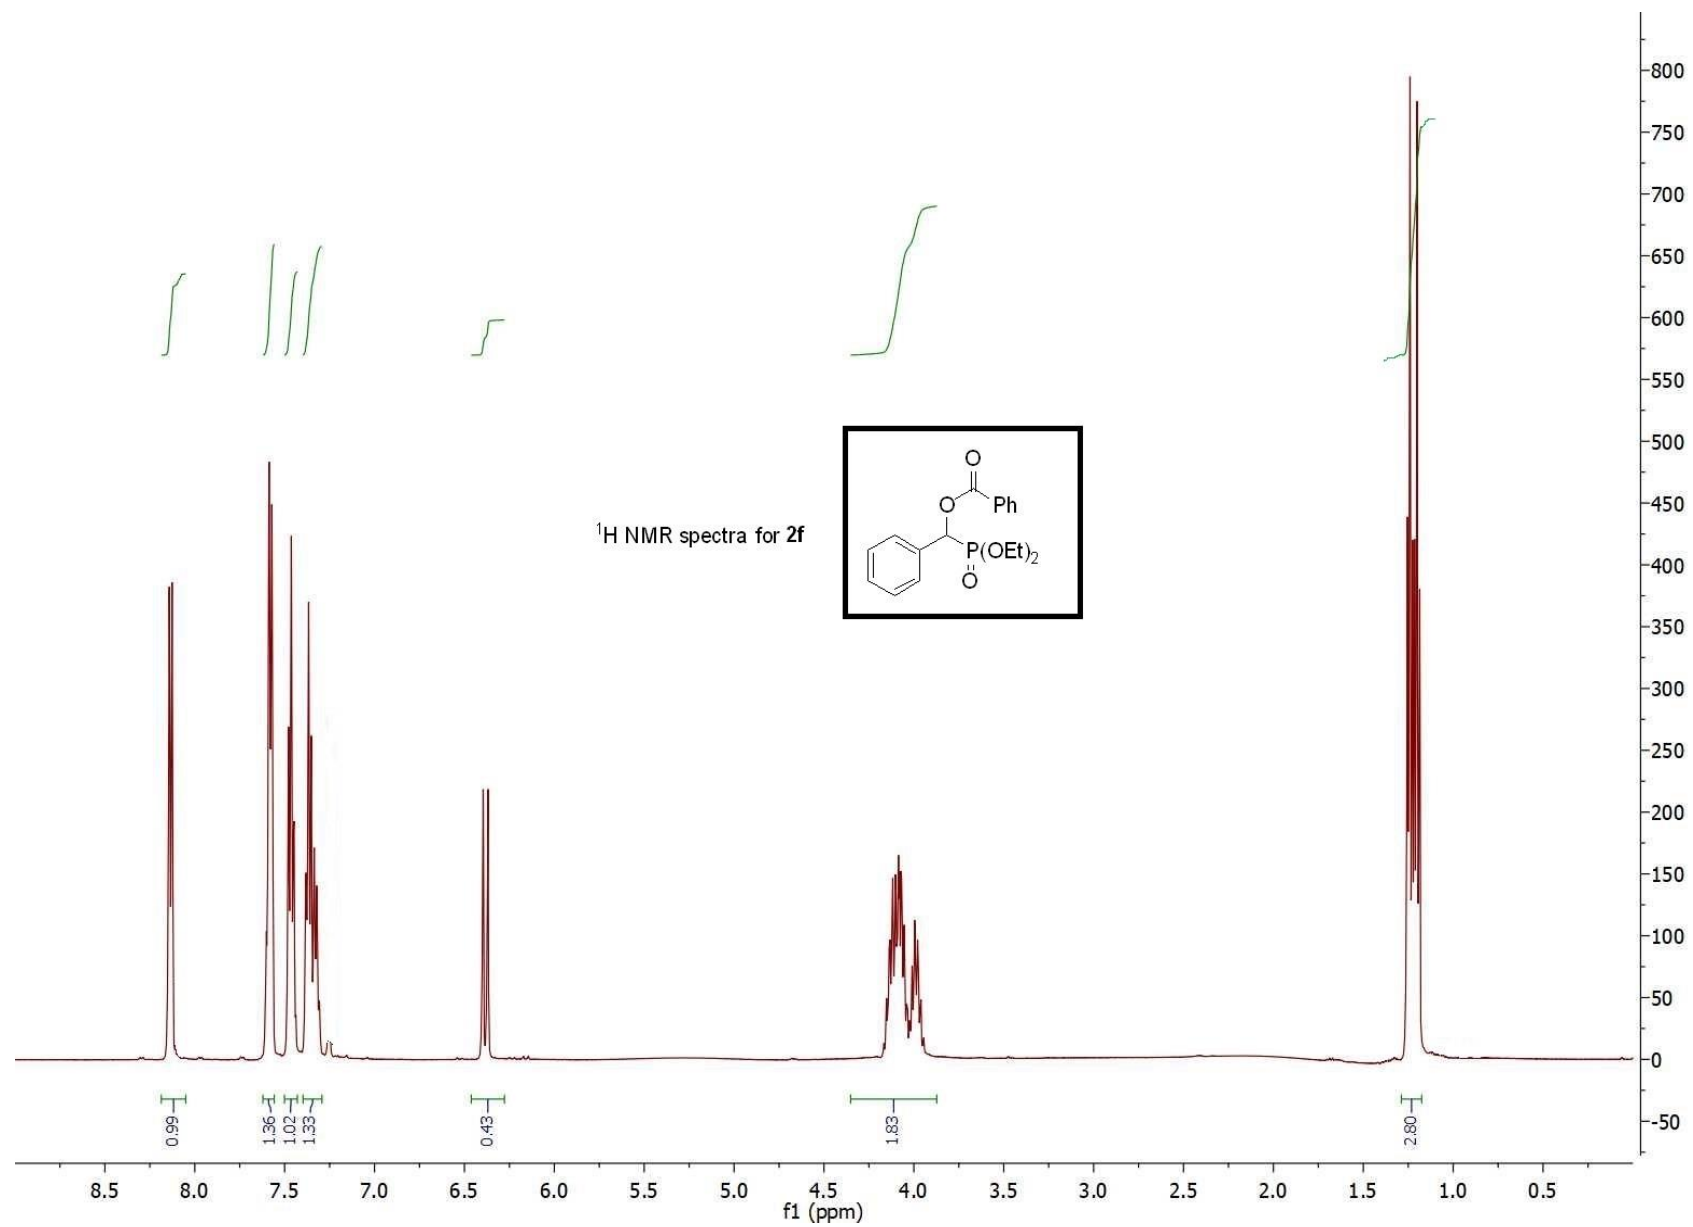

$^{31}\text{P}$  NMR spectra for **4a**

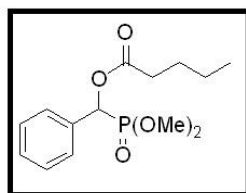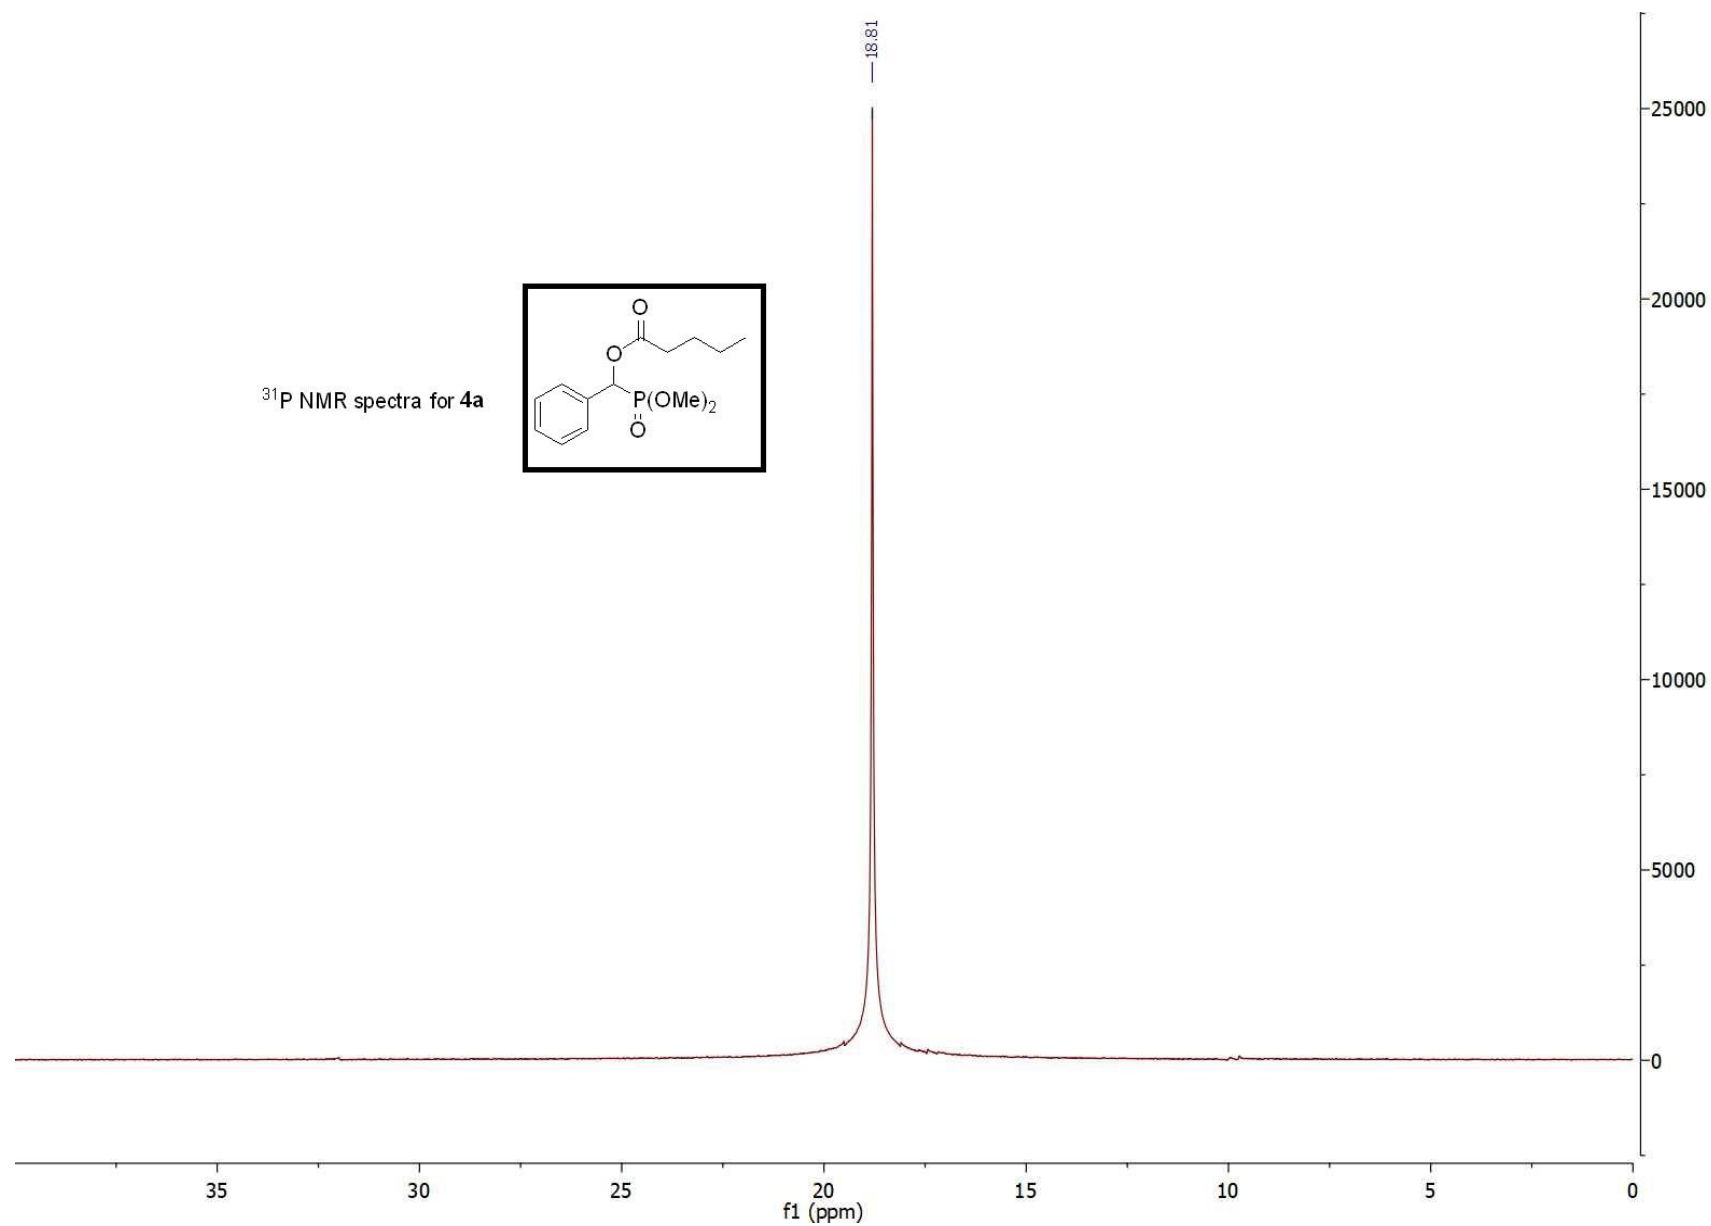

S26

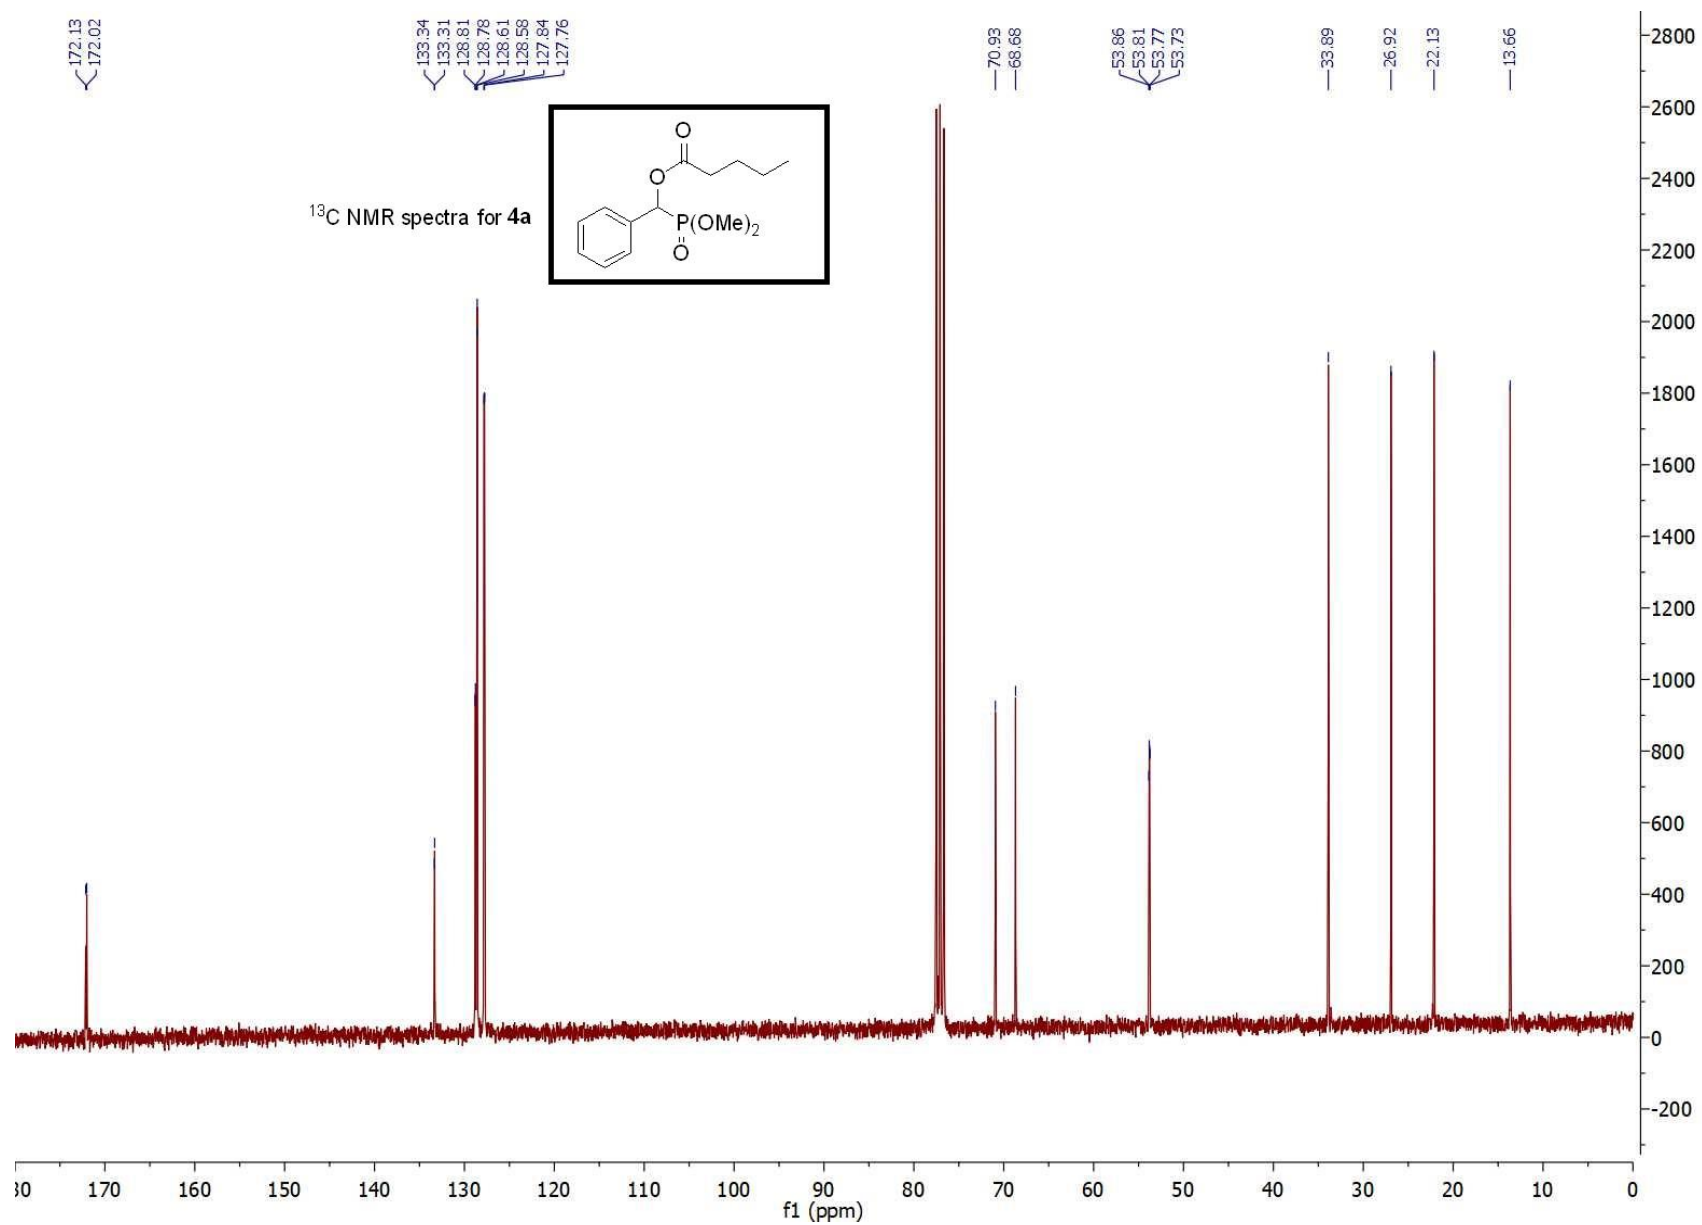

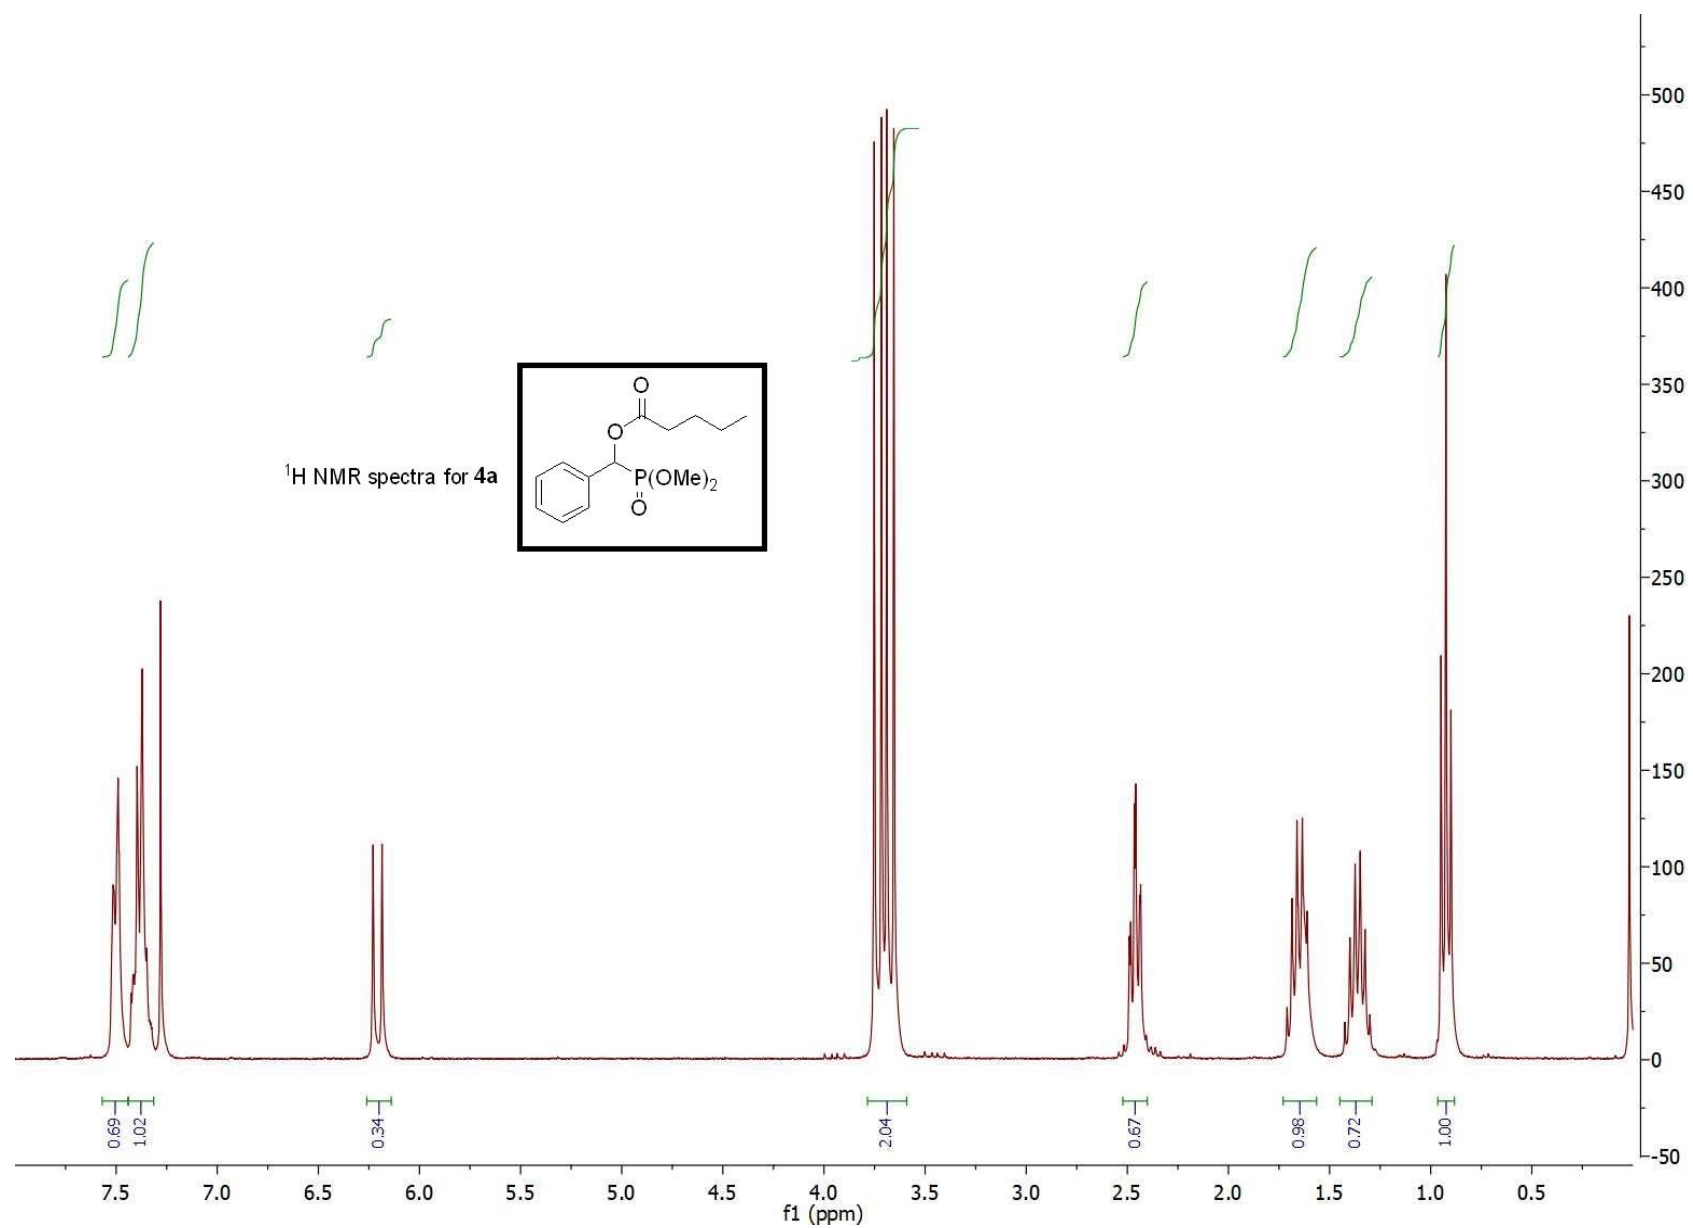

$^{31}\text{P}$  NMR spectra for **4b**

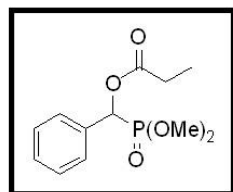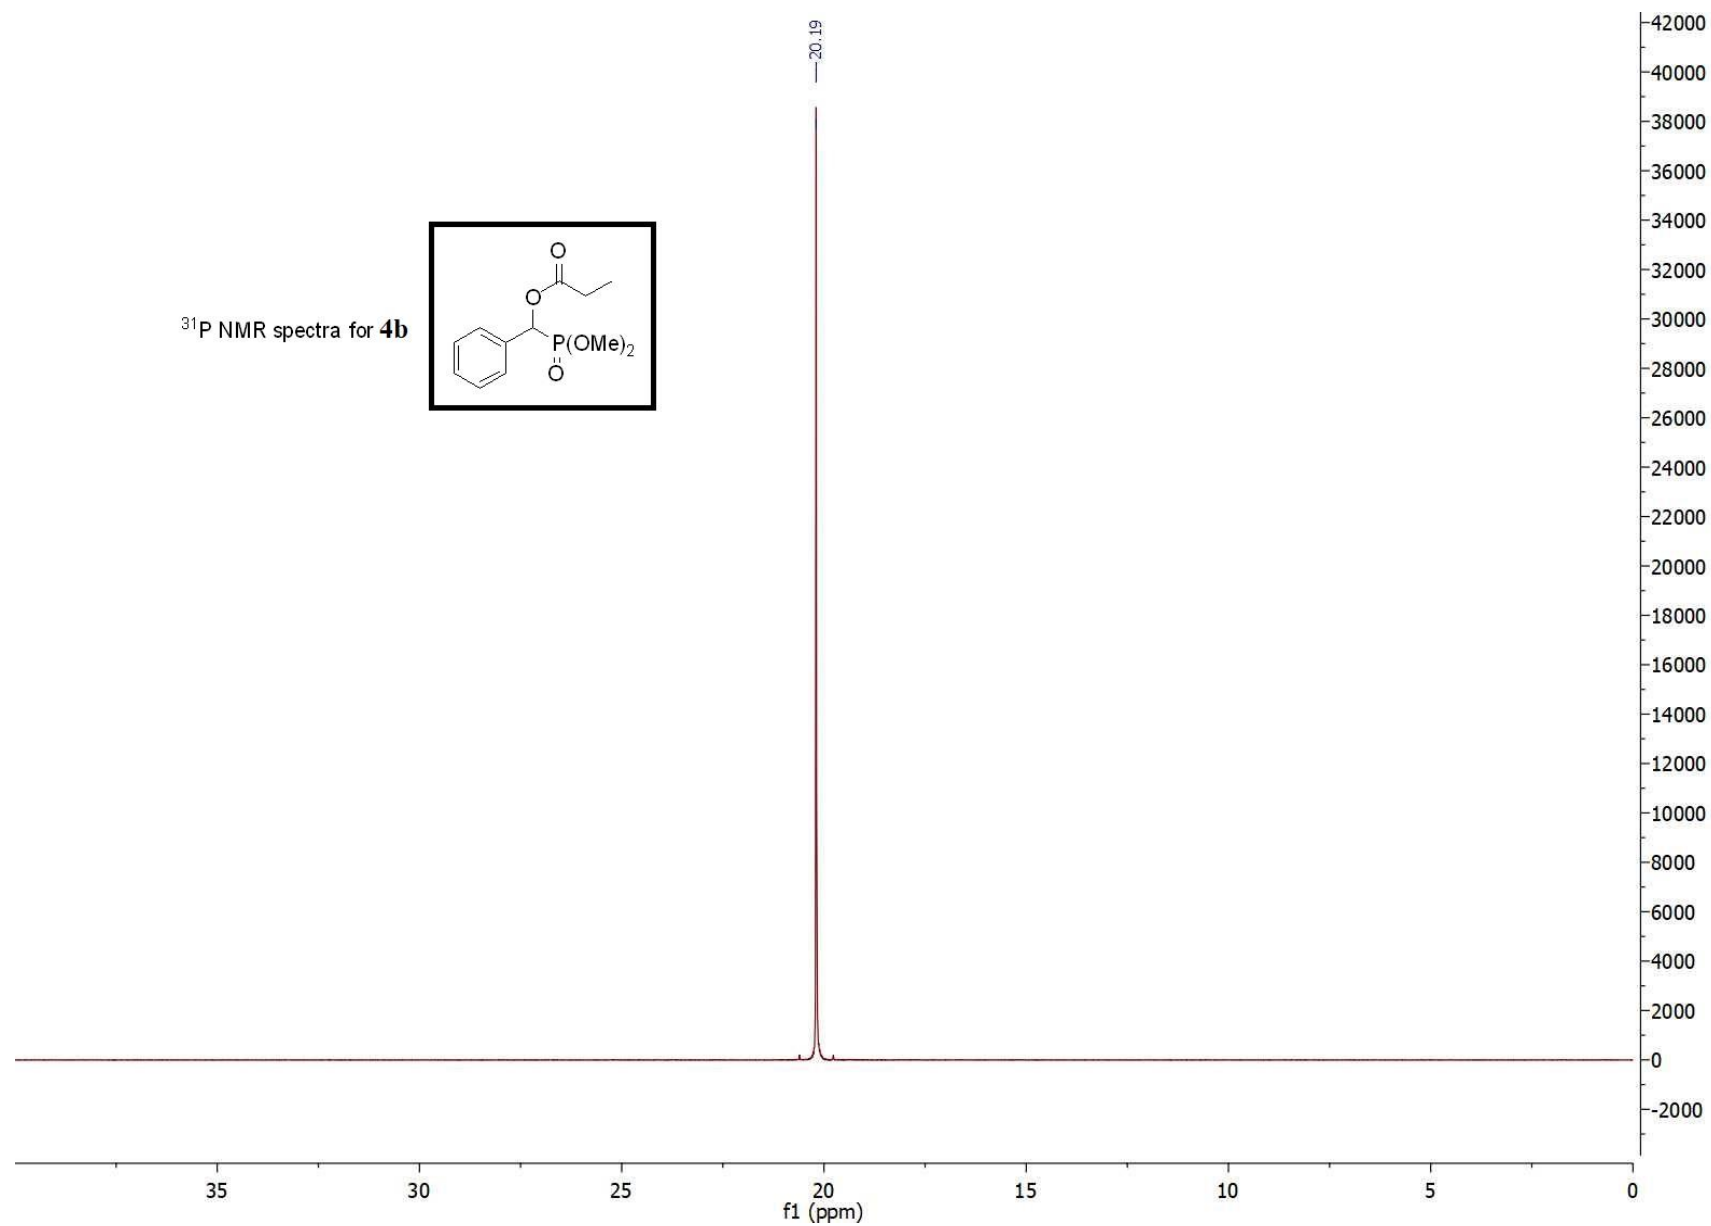

S29

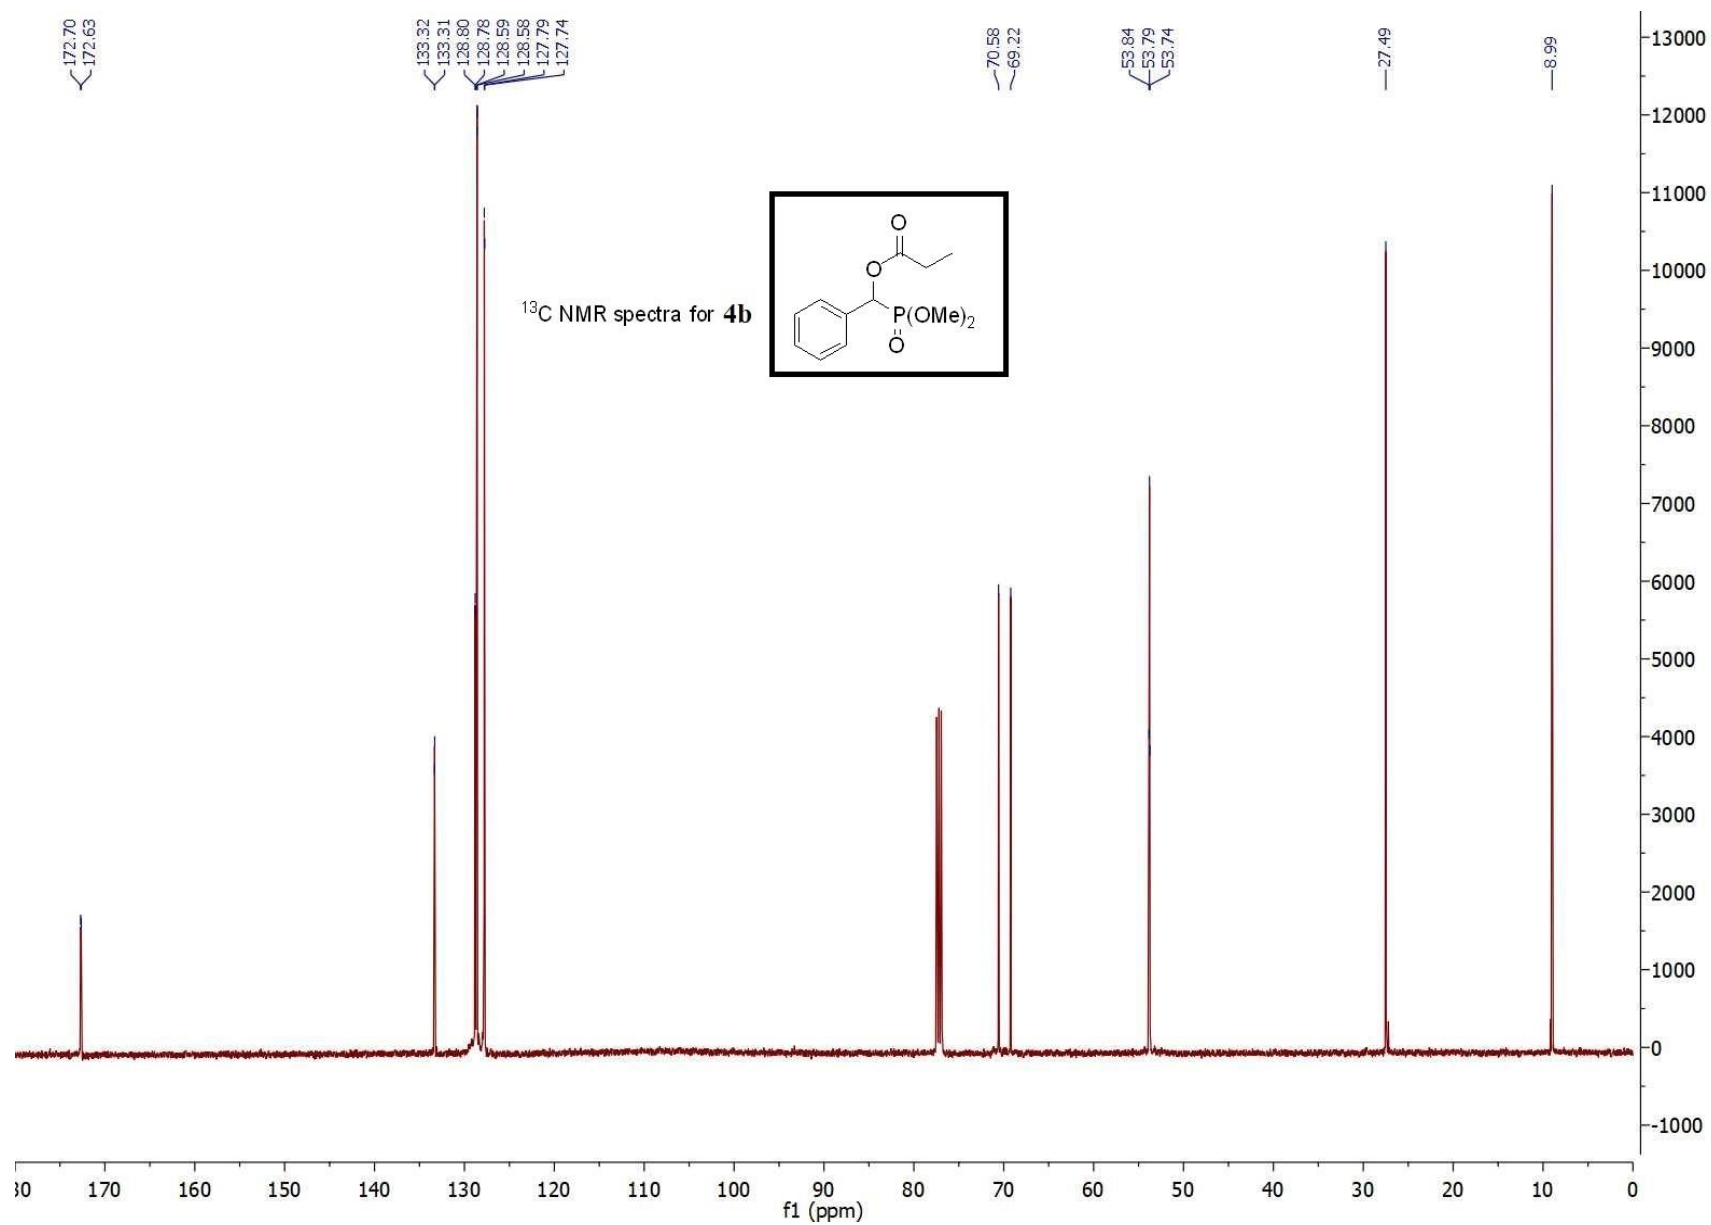

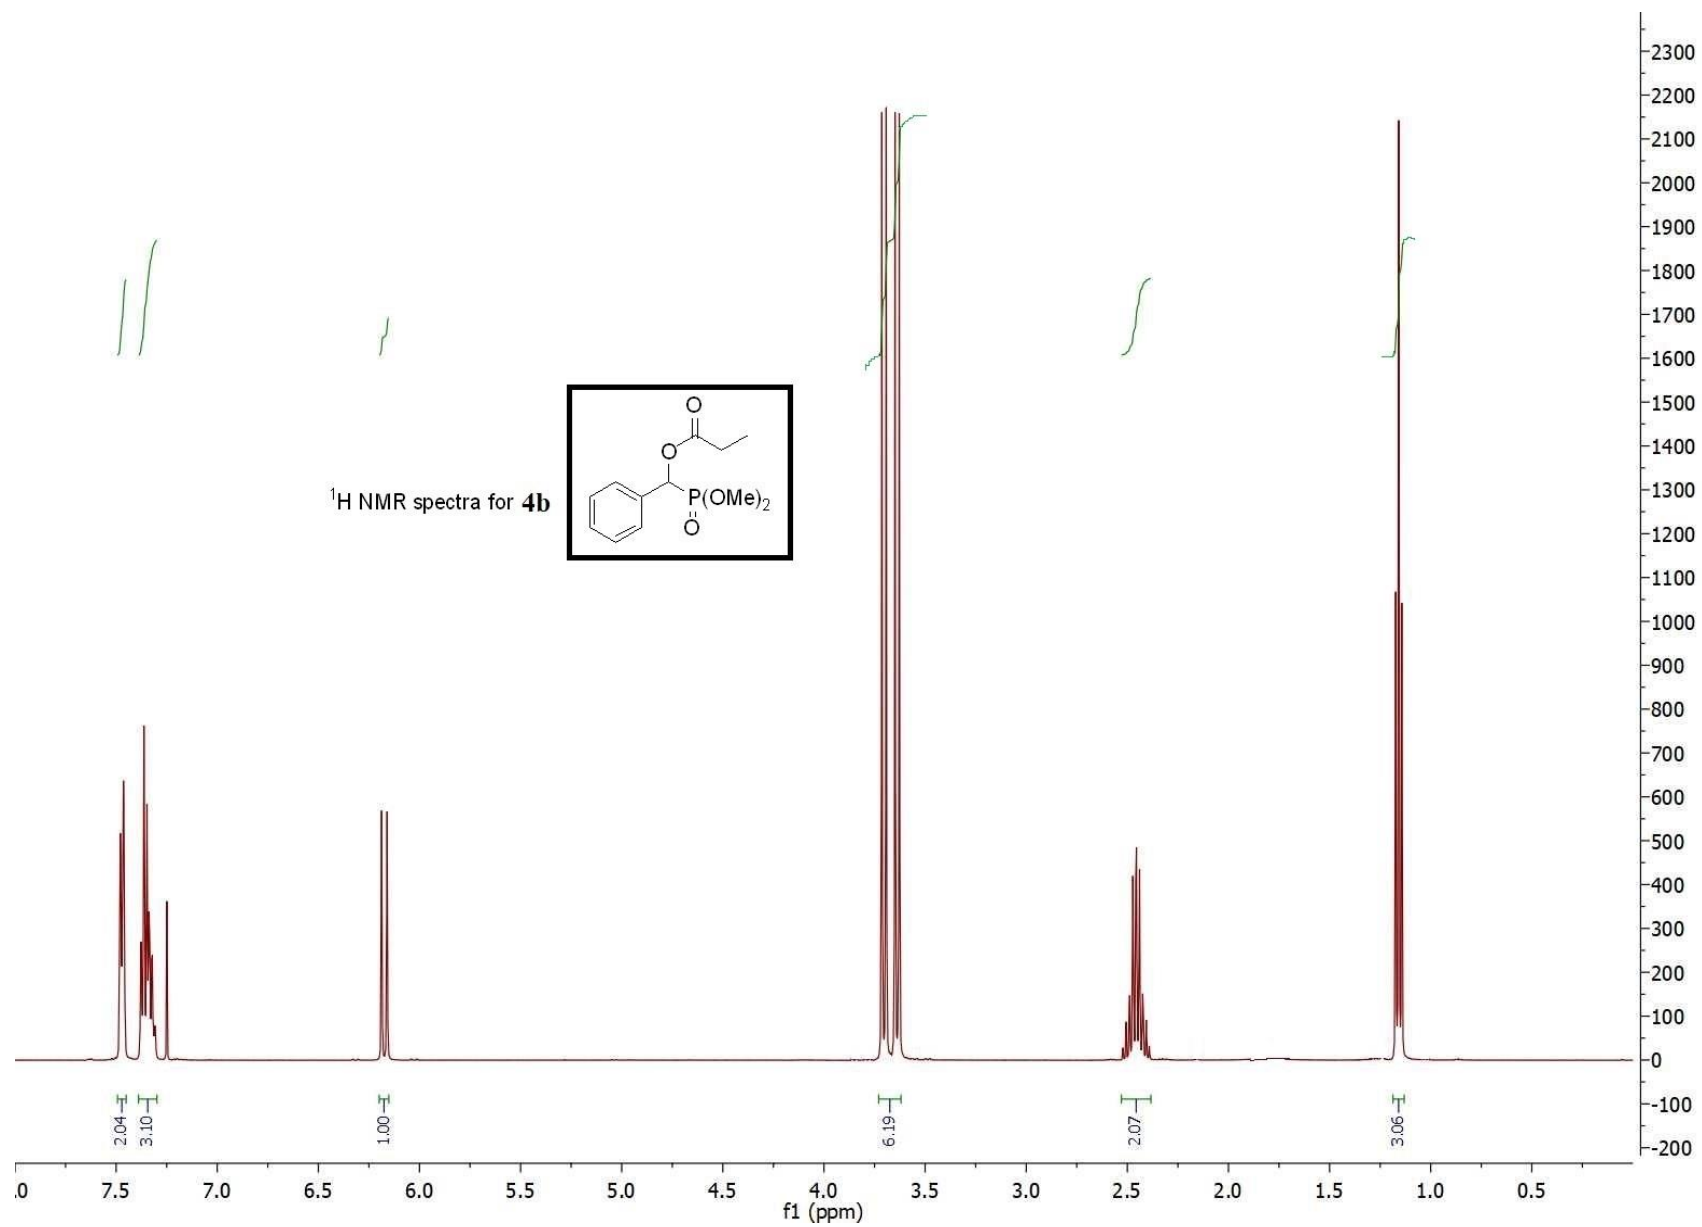

$^{31}\text{P}$  NMR spectra for **4c**

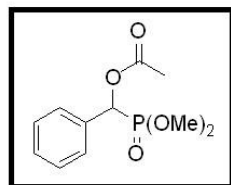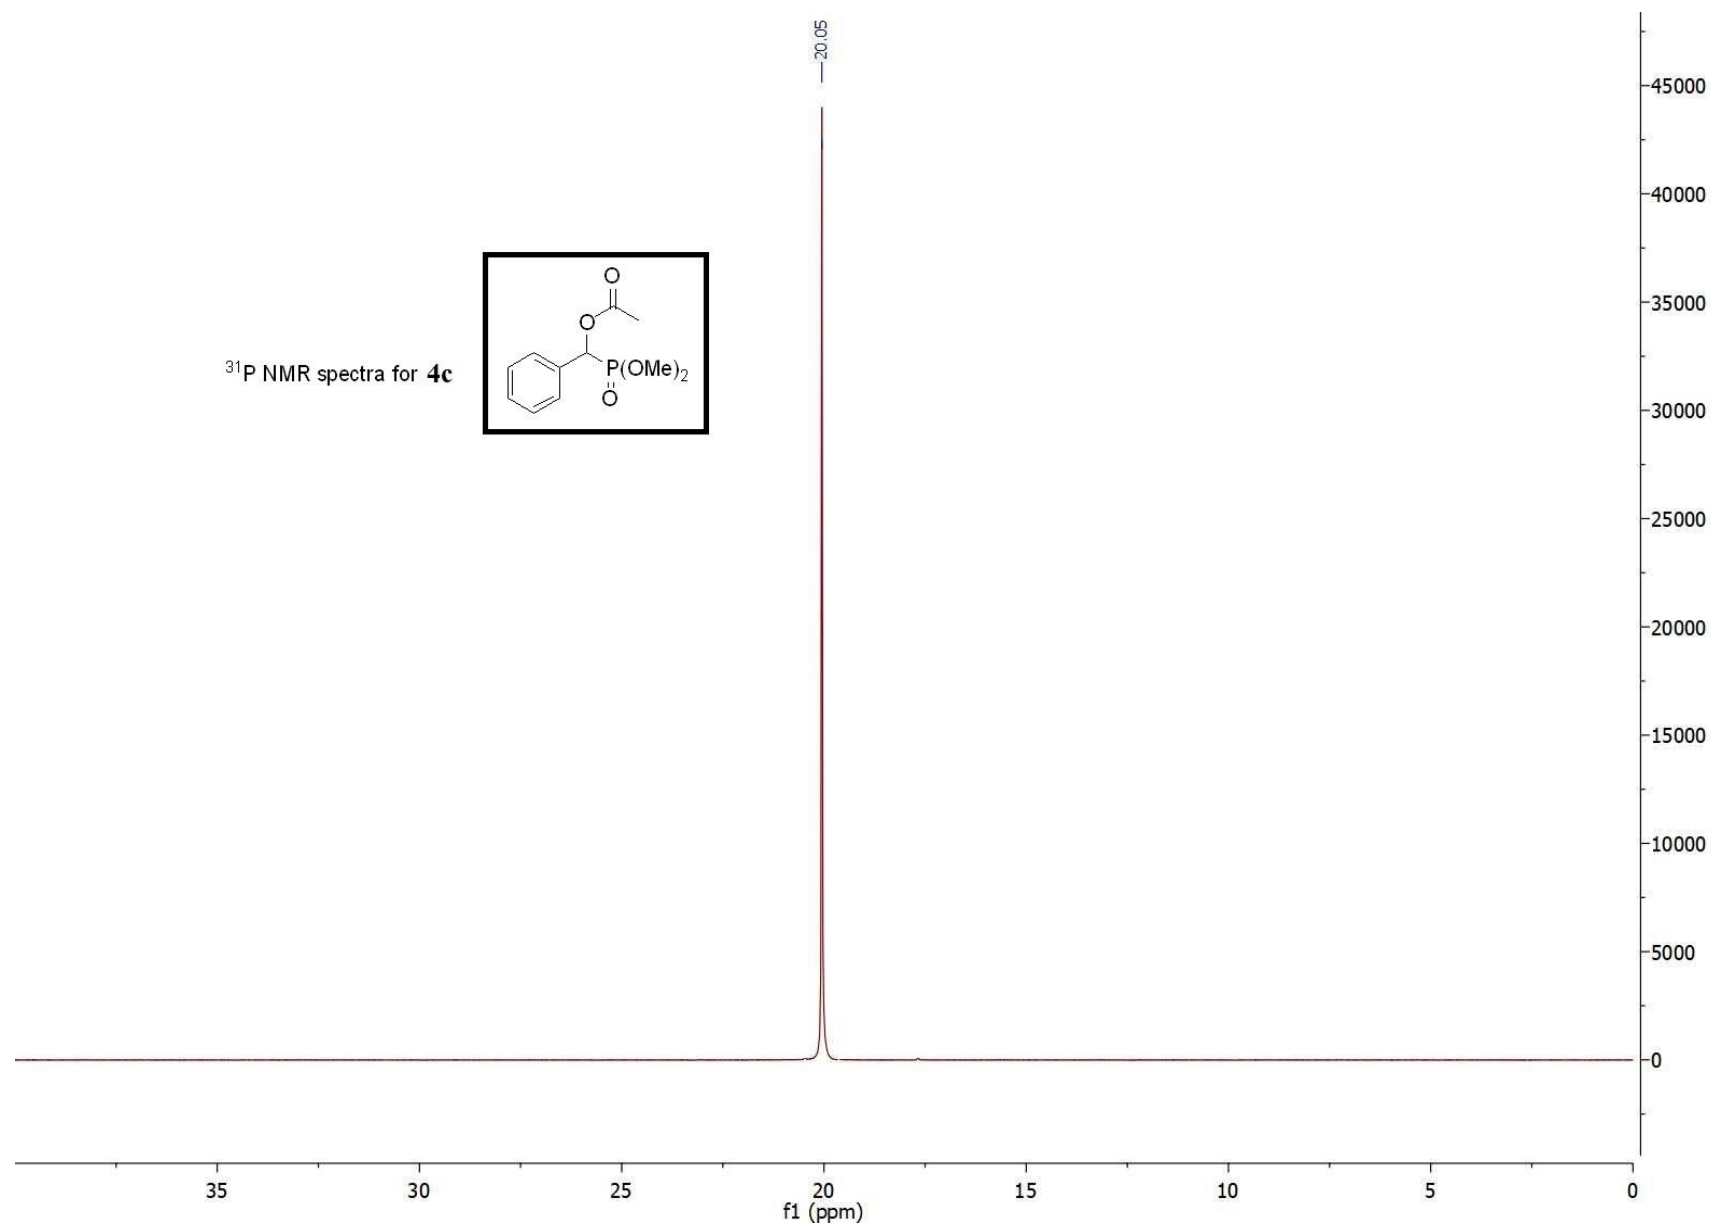

S32



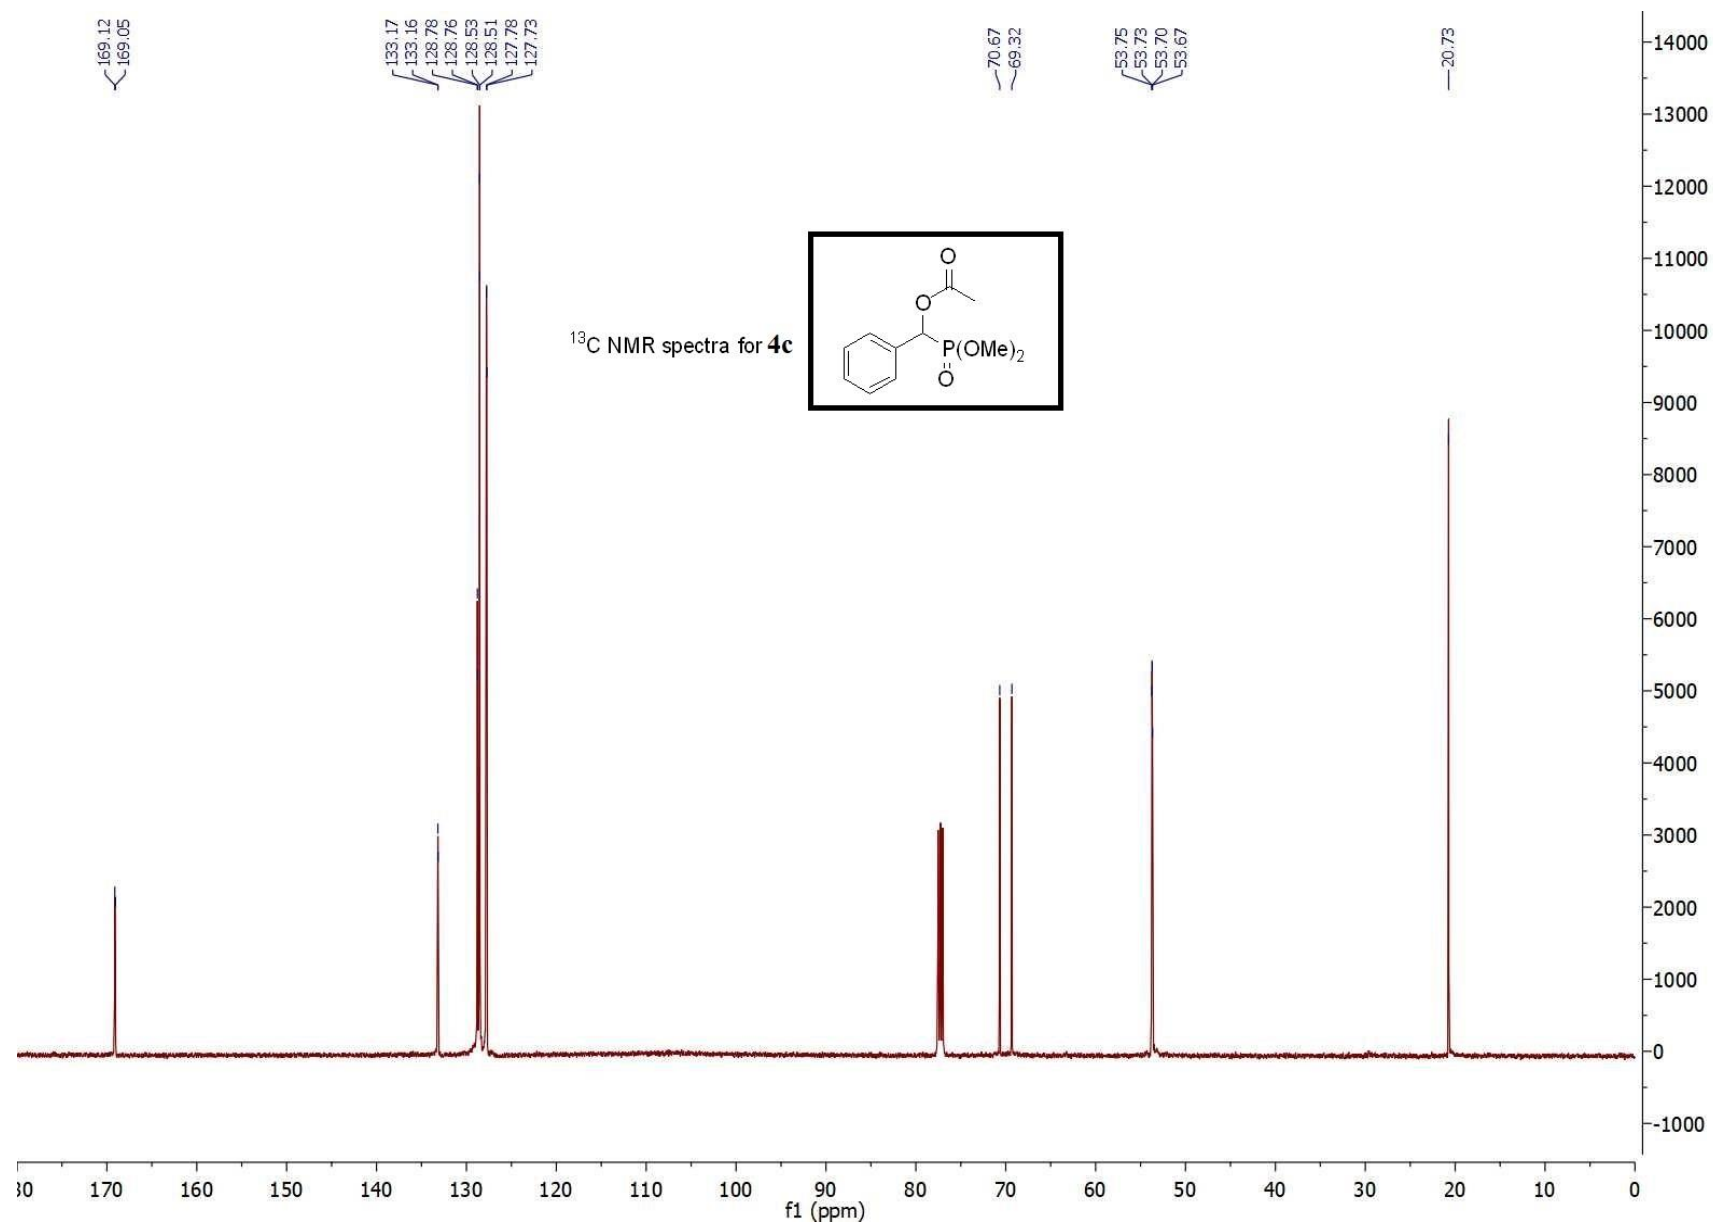

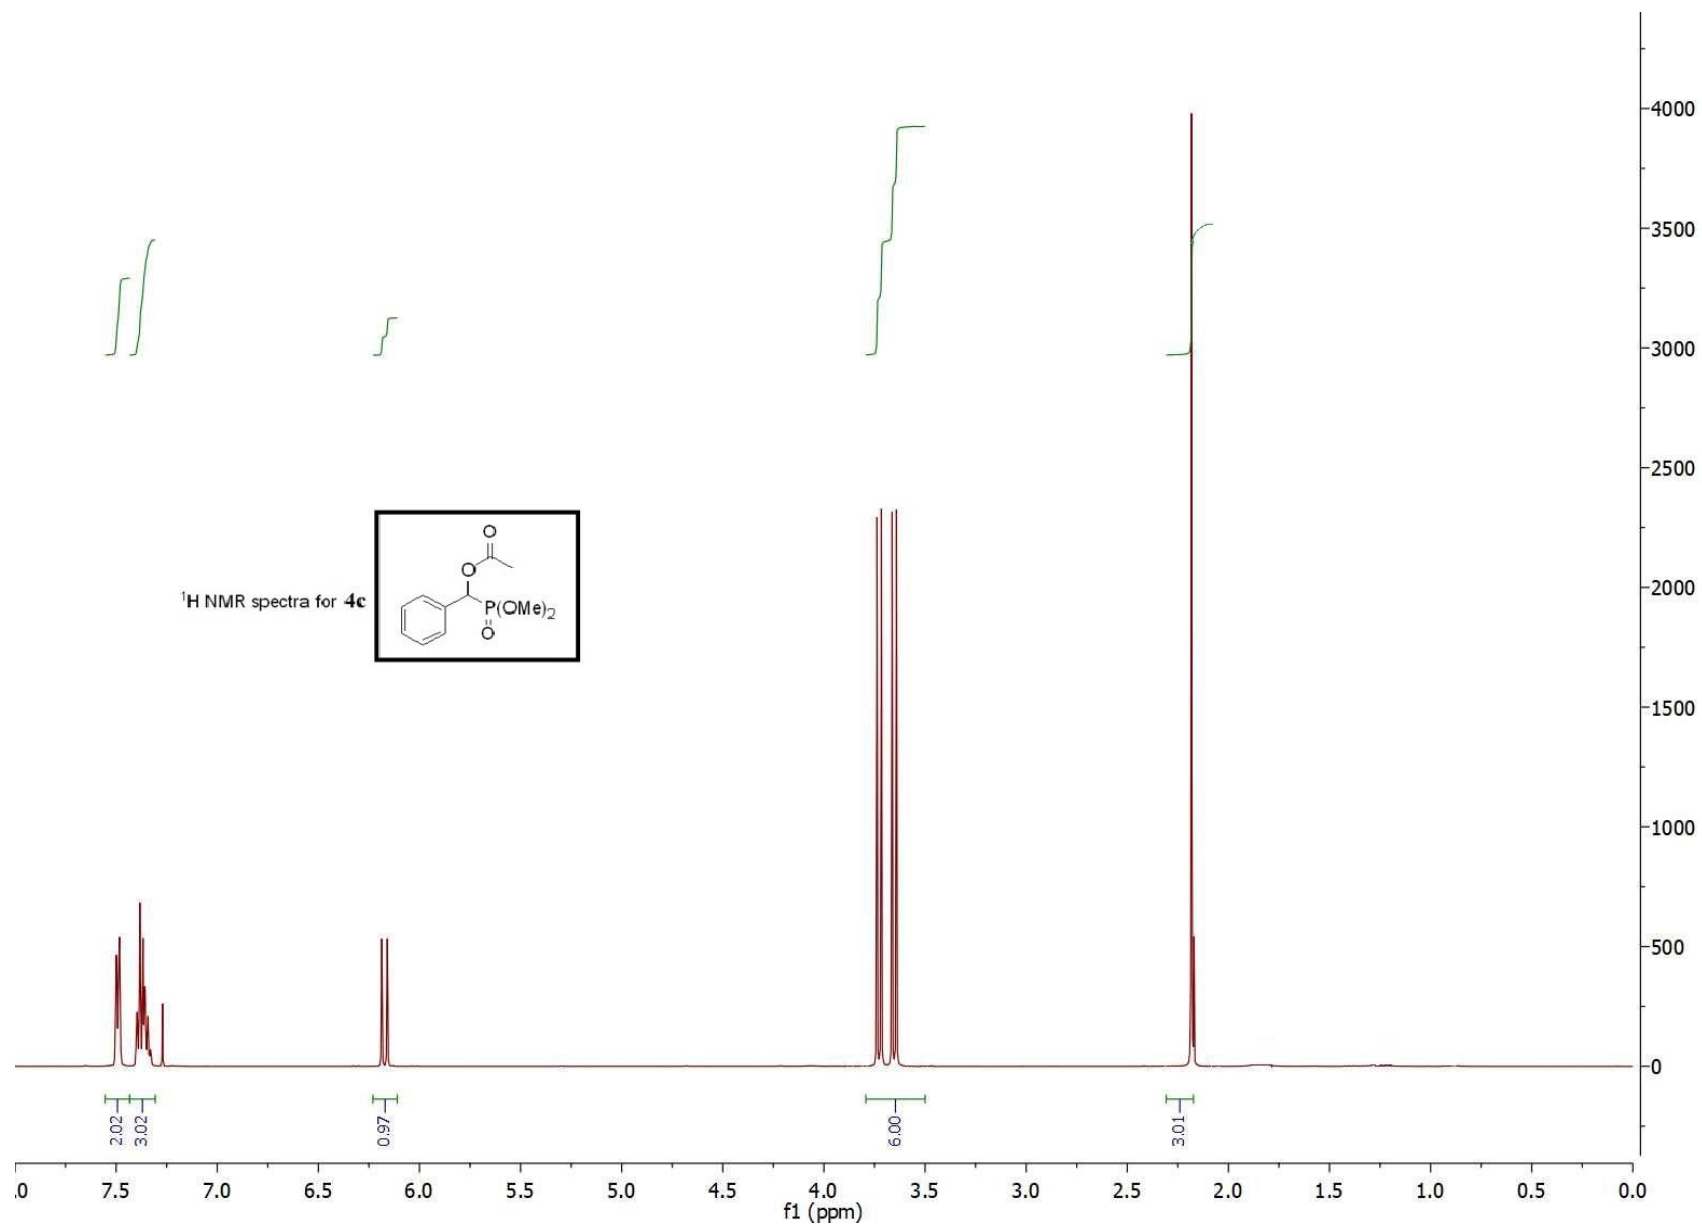

$^{31}\text{P}$  NMR spectra for **4d**

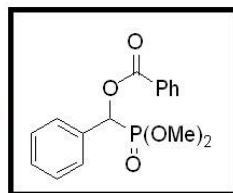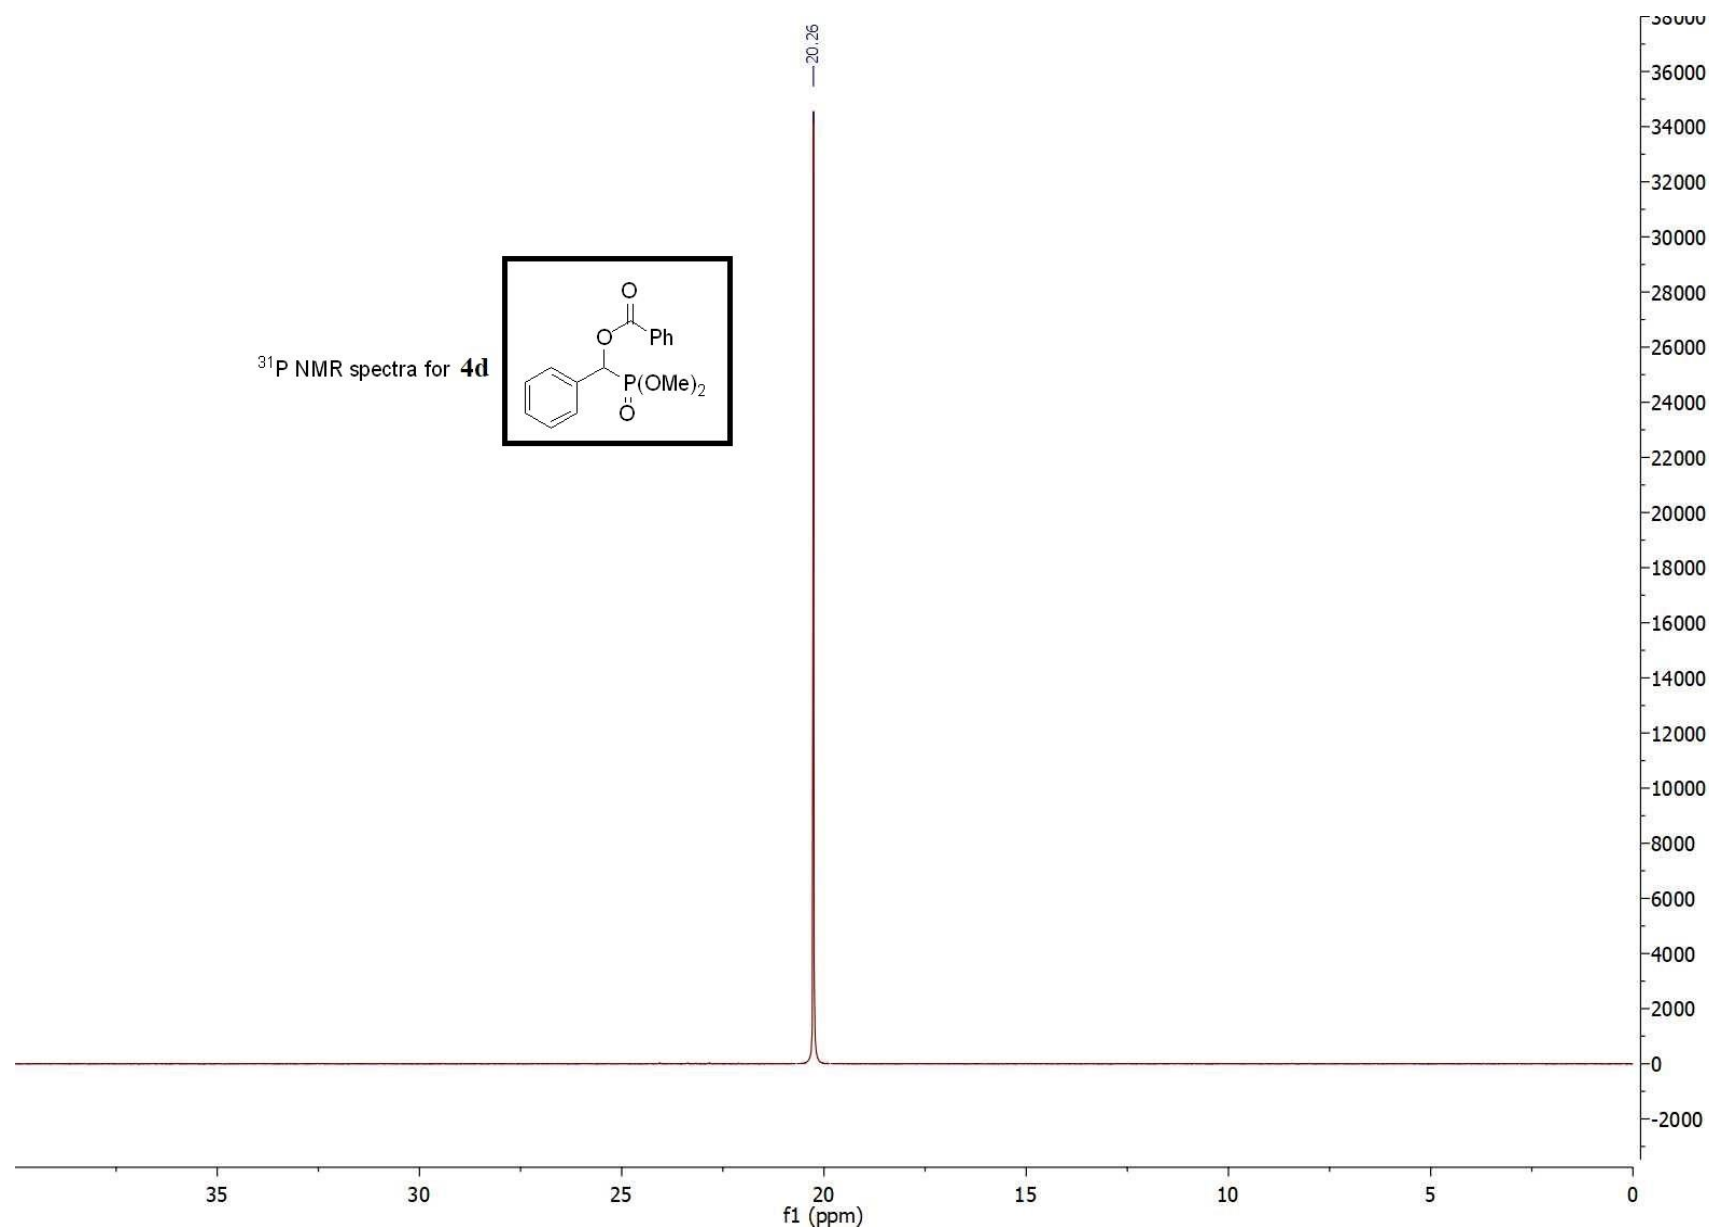

S35

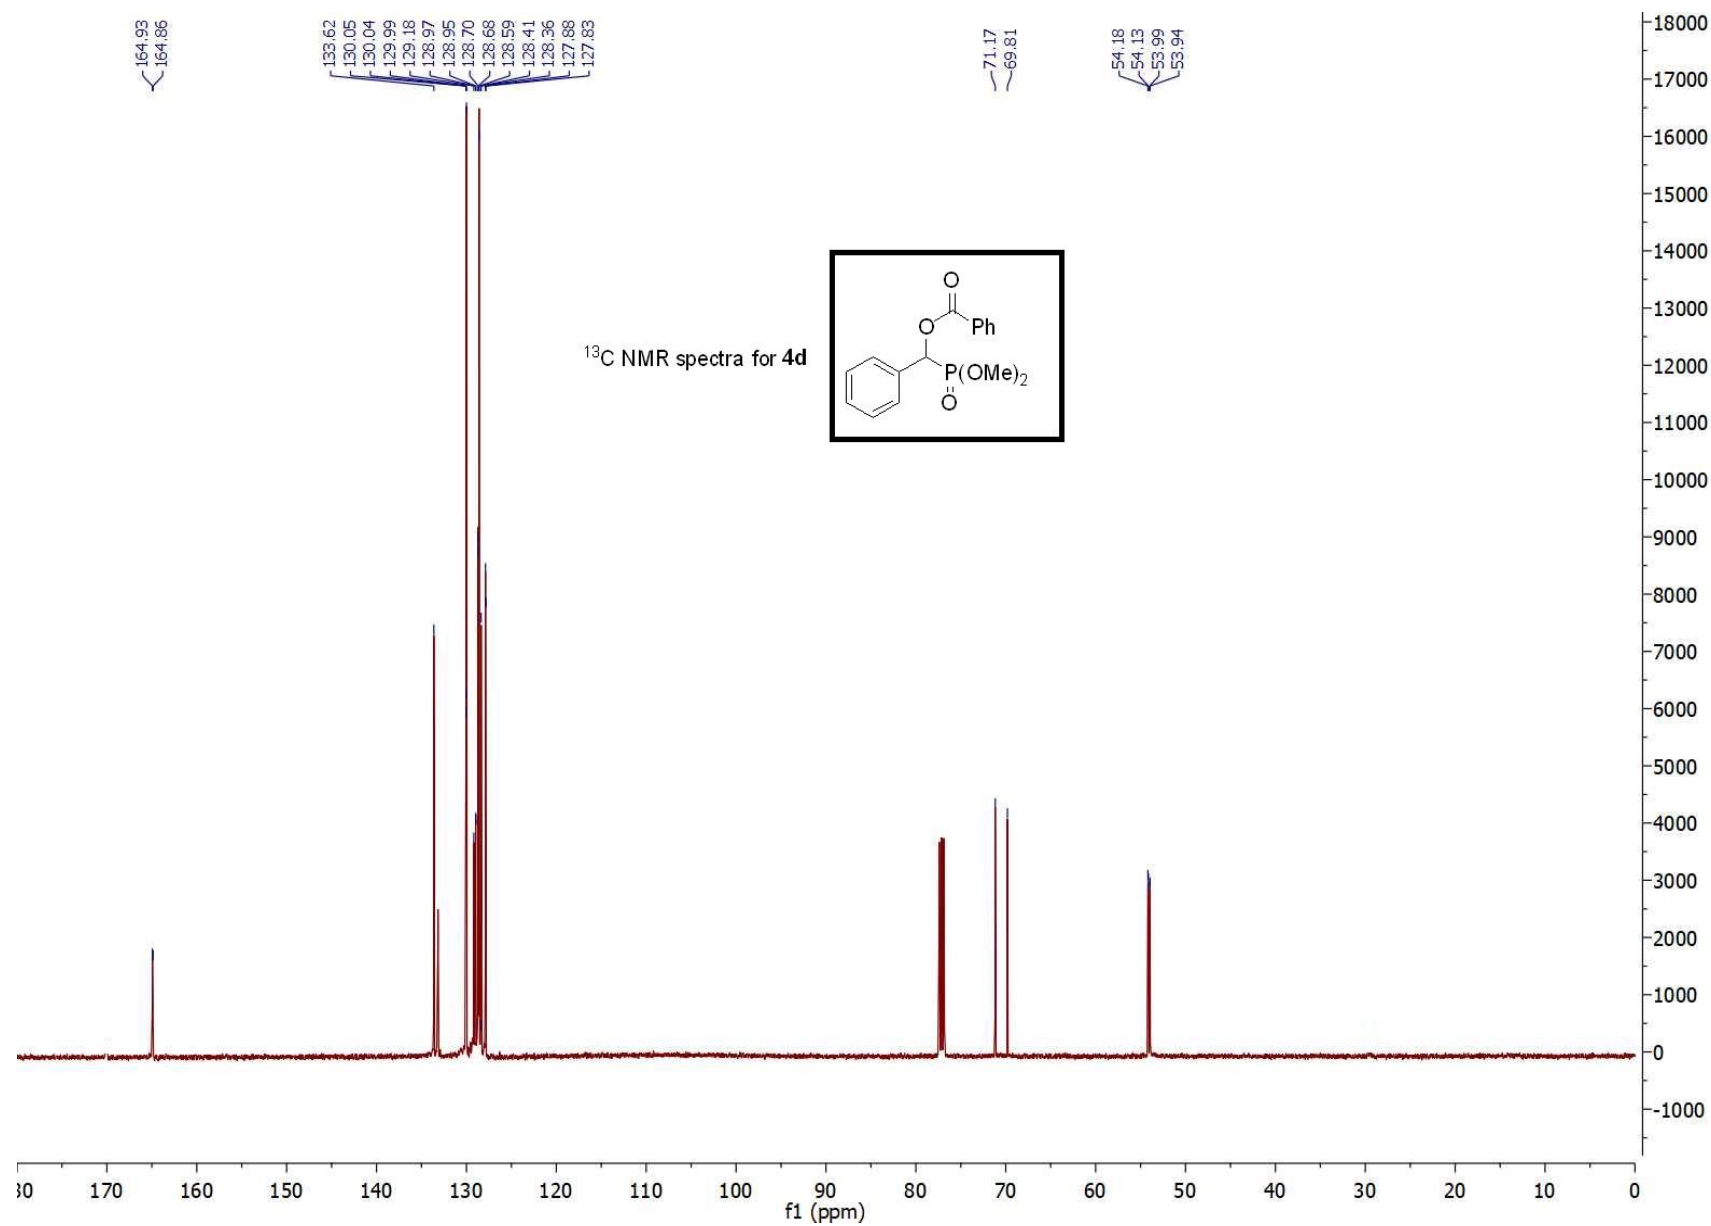

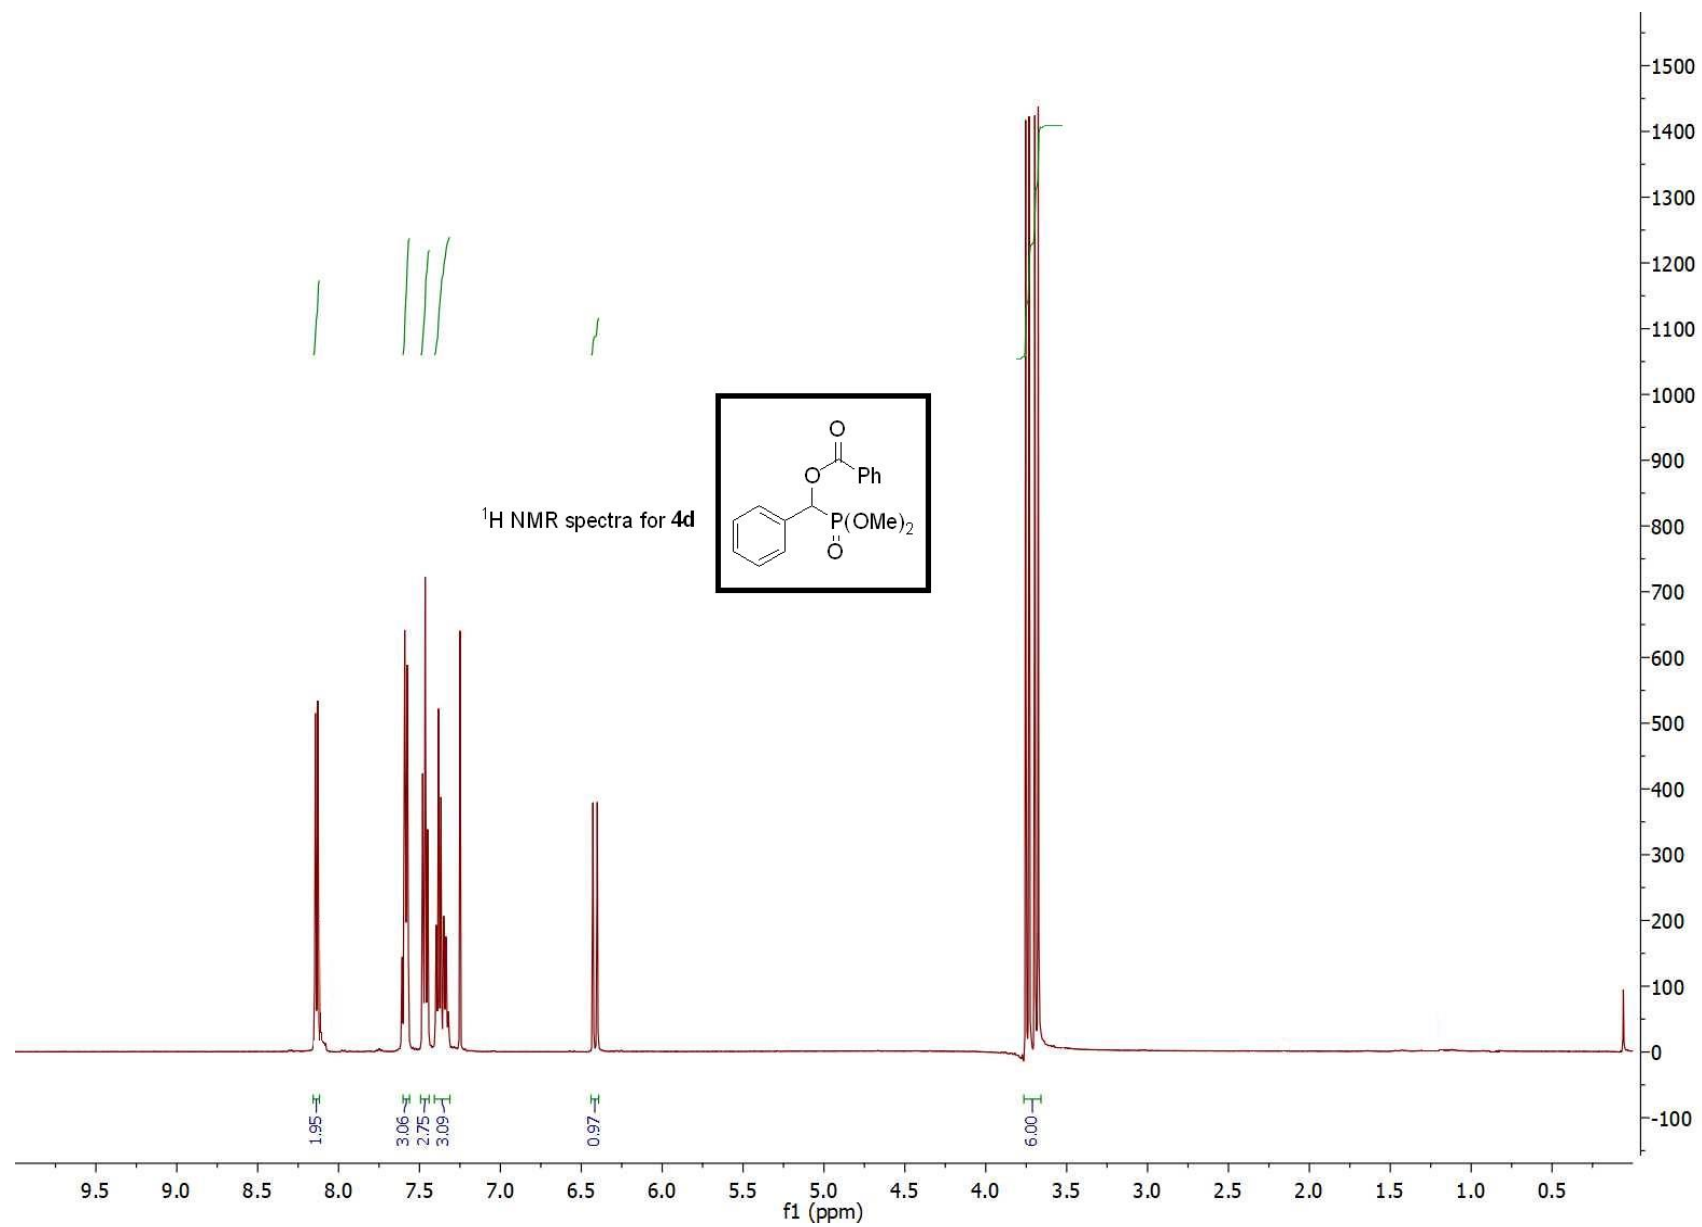

Supplement: s1 [file s1]
